# Supplementary material for: Psychiatric Disorders and Oxidative Injury: Antioxidant Effects of Zolpidem Therapy disclosed In Silico
Source: PubMed Central journal article supplement — Comput Struct Biotechnol J. 2019 Feb 7;17:311–8. doi: 10.1016/j.csbj.2019.02.004 (PMC6396081; doi:10.1016/j.csbj.2019.02.004), 2019-02-07
Supplement: mmc1.pdf [file mmc1.pdf]

# - SUPPORTING INFORMATION -

## Psychiatric Disorders and Oxidative Injury: Antioxidant

### Effects of Zolpidem Therapy disclosed *in silico*

Marco Bortoli,<sup>a</sup> Marco Dalla Tiezza,<sup>a</sup> Cecilia Muraro,<sup>a</sup> Chiara Pavan,<sup>b</sup> Giovanni Ribaudò,<sup>c</sup>

Anna Rodighiero,<sup>a</sup> Cristina Tubaro,<sup>a</sup> Giuseppe Zagotto,<sup>c</sup> Laura Orian\*<sup>a</sup>

<sup>a</sup> Dipartimento di Scienze Chimiche, Università degli Studi di Padova, Via Marzolo 1, 35131 Padova, Italy.

<sup>b</sup> Dipartimento di Medicina, Università degli Studi di Padova, Via Giustiniani 2, 35128 Padova, Italy.

<sup>c</sup> Dipartimento di Scienze del Farmaco, Università degli Studi di Padova, Via Marzolo 5, 35131 Padova, Italy.

#### LIST of TABLES and FIGURES:

**Table S1.**  $\Delta G^{\circ}_{\text{HAT}}$  (kcal mol<sup>-1</sup>) in gas-phase, water and benzene, for the scavenging of HO<sup>•</sup>, HOO<sup>•</sup>, CH<sub>3</sub>O<sup>•</sup>, CH<sub>3</sub>OO<sup>•</sup> and CH<sub>2</sub>CHOO<sup>•</sup> radicals through HAT from all the sites of **1** (Scheme 1). Level of theory: (SMD)-M06-2X/6-311+G(d,p)//M06-2X/6-31G(d)..... 3

**Table S2.**  $\Delta G^{\circ}_{\text{HAT}}$  (kcal mol<sup>-1</sup>) in gas-phase, water and benzene, for the scavenging of HO<sup>•</sup>, HOO<sup>•</sup>, CH<sub>3</sub>O<sup>•</sup>, CH<sub>3</sub>OO<sup>•</sup> and CH<sub>2</sub>=CHOO<sup>•</sup> radicals through HAT from C4 for **1** and its metabolites. Level of theory: (SMD)-M06-2X/6-311+G(d,p)//M06-2X/6-31G(d).....4

**Table S3.**  $\Delta G^{\circ}_{\text{HAT}}$  (kcal mol<sup>-1</sup>) in gas-phase, water and benzene, for the scavenging of HO<sup>•</sup>, HOO<sup>•</sup>, CH<sub>3</sub>O<sup>•</sup>, CH<sub>3</sub>OO<sup>•</sup> and CH<sub>2</sub>=CHOO<sup>•</sup> radicals through HAT from neutral Trolox (see Scheme 1 in the text). For comparison the values of HAT from C4 of zolpidem **1** are also included. Level of theory: (SMD)-M06-2X/6-311+G(d,p)//M06-2X/6-31G(d).....5

**Figure S1.** Conformers of melatonin **2** considered in this work .....6

**Table S4.**  $\Delta G^{\circ}_{\text{HAT}}$  (kcal mol<sup>-1</sup>) in gas-phase, water and benzene, for the scavenging of HO<sup>•</sup>, HOO<sup>•</sup>, CH<sub>3</sub>O<sup>•</sup>, CH<sub>3</sub>OO<sup>•</sup> and CH<sub>2</sub>=CHOO<sup>•</sup> radicals through HAT from C4 site of melatonin **2** (see Scheme 1 in the text). Two lowest energy conformers of melatonin, **2a** and **2b**, have been considered (Figure S1)<sup>[a]</sup>. Level of theory: (SMD)-M06-2X/6-311+G(d,p)//M06-2X/6-31G(d).....7

**Table S5.**  $\Delta G^{\circ}_{\text{HAT}}$  (kcal mol<sup>-1</sup>) in gas-phase, water and benzene, for the scavenging of HO<sup>•</sup>, HOO<sup>•</sup>, CH<sub>3</sub>O<sup>•</sup>, CH<sub>3</sub>OO<sup>•</sup> and CH<sub>2</sub>=CHOO<sup>•</sup> radicals through HAT from the OH or COOH sites of zolpidem metabolites (see Scheme 3 in the text). For comparison the values of HAT from

|                                                                                                                                                                                                                                                                                                                                                                                                                                                                                                                               |    |
|-------------------------------------------------------------------------------------------------------------------------------------------------------------------------------------------------------------------------------------------------------------------------------------------------------------------------------------------------------------------------------------------------------------------------------------------------------------------------------------------------------------------------------|----|
| C4 of zolpidem <b>1</b> are also included. Level of theory: (SMD)-M06-2X/6-311+G(d,p)//M06-2X/6-31G(d).....                                                                                                                                                                                                                                                                                                                                                                                                                   | 8  |
| <b>Table S6.</b> $\Delta G^{\ddagger}_{\text{HAT}}$ (kcal mol <sup>-1</sup> ) in gas-phase, water and benzene, for the scavenging of HO <sup>•</sup> , HOO <sup>•</sup> , CH <sub>3</sub> O <sup>•</sup> , CH <sub>3</sub> OO <sup>•</sup> and CH <sub>2</sub> =CHOO <sup>•</sup> through HAT from the OH or COOH sites of zolpidem metabolites (see Scheme 3 in the text). For comparison the values of HAT from C4 of zolpidem <b>1</b> are also included. Level of theory: (SMD)-M06-2X/6-311+G(d,p)//M06-2X/6-31G(d)..... | 9  |
| <b>Table S7.</b> Coordinates and energies of the structures of melatonin and melatonin radicals at the C4 site. Level of theory: M06-2X/6-31G(d).....                                                                                                                                                                                                                                                                                                                                                                         | 10 |
| <b>Table S8.</b> Coordinates and energies of the structures of zolpidem and zolpidem radicals at each available site. Level of theory: M06-2X/6-31G(d).....                                                                                                                                                                                                                                                                                                                                                                   | 11 |
| <b>Table S9.</b> Coordinates and energies of the stationary points of the HAT from C4 site of zolpidem to between HO <sup>•</sup> . Level of theory: M06-2X/6-31G(d).....                                                                                                                                                                                                                                                                                                                                                     | 15 |
| <b>Table S10.</b> Coordinates and energies of the stationary points of the HAT from C4 site of zolpidem to HOO <sup>•</sup> Level of theory: M06-2X/6-31G(d).....                                                                                                                                                                                                                                                                                                                                                             | 16 |
| <b>Table S11.</b> Coordinates and energies of the stationary points of the HAT from c4 site of zolpidem to CH <sub>3</sub> O <sup>•</sup> . Level of theory: M06-2X/6-31G(d).....                                                                                                                                                                                                                                                                                                                                             | 16 |
| <b>Table S12.</b> Coordinates and energies of the stationary points of the HAT from C4 site of zolpidem to CH <sub>3</sub> OO <sup>•</sup> . Level of theory: M06-2X/6-31G(d).....                                                                                                                                                                                                                                                                                                                                            | 17 |
| <b>Table S13.</b> Coordinates and energies of the zolpidem metabolites, their radical form at the C4 site and at the OH/COOH sites, and of the transition states for the HAT from the C4 site and from the OH/COOH site to the studied radicals. Level of theory: M06-2X/6-31G(d) .....                                                                                                                                                                                                                                       | 18 |

**Table S1.**  $\Delta G^\circ_{\text{HAT}}$  (kcal mol<sup>-1</sup>) in gas-phase, water and benzene, for the scavenging of HO<sup>•</sup>, HOO<sup>•</sup>, CH<sub>3</sub>O<sup>•</sup>, CH<sub>3</sub>OO<sup>•</sup> and CH<sub>2</sub>CHOO<sup>•</sup> radicals through HAT from all the sites of **1** (Scheme 1). Level of theory: (SMD)-M06-2X/6-311+G(d,p)//M06-2X/6-31G(d).

|     | $\Delta G^\circ_{\text{HAT,gas}}$ |                  |                                |                                 |                                    | $\Delta G^\circ_{\text{HAT,water}}$ |                  |                                |                                 |                                    | $\Delta G^\circ_{\text{HAT,benzene}}$ |                  |                                |                                 |                                    |
|-----|-----------------------------------|------------------|--------------------------------|---------------------------------|------------------------------------|-------------------------------------|------------------|--------------------------------|---------------------------------|------------------------------------|---------------------------------------|------------------|--------------------------------|---------------------------------|------------------------------------|
|     | HO <sup>•</sup>                   | HOO <sup>•</sup> | CH <sub>3</sub> O <sup>•</sup> | CH <sub>3</sub> OO <sup>•</sup> | CH <sub>2</sub> =CHOO <sup>•</sup> | HO <sup>•</sup>                     | HOO <sup>•</sup> | CH <sub>3</sub> O <sup>•</sup> | CH <sub>3</sub> OO <sup>•</sup> | CH <sub>2</sub> =CHOO <sup>•</sup> | HO <sup>•</sup>                       | HOO <sup>•</sup> | CH <sub>3</sub> O <sup>•</sup> | CH <sub>3</sub> OO <sup>•</sup> | CH <sub>2</sub> =CHOO <sup>•</sup> |
| C1  | -21.7                             | 9.9              | -7.2                           | 11.5                            | 8.6                                | -25.9                               | 6.5              | -10.8                          | 7.8                             | 4.3                                | -23.1                                 | 9.0              | -8.0                           | 10.8                            | 7.5                                |
| C2  | -22.6                             | 8.9              | -8.1                           | 10.5                            | 7.7                                | -25.4                               | 7.0              | -10.4                          | 8.3                             | 4.7                                | -23.8                                 | 8.2              | -8.8                           | 10.1                            | 6.7                                |
| C4  | -33.3                             | -1.7             | -18.8                          | -0.1                            | -3.0                               | -34.4                               | -1.9             | -19.3                          | -0.7                            | -4.2                               | -33.8                                 | -1.7             | -18.7                          | -0.1                            | -3.2                               |
| C6  | -1.2                              | 30.4             | 13.3                           | 31.9                            | 29.0                               | -5.2                                | 27.3             | 9.9                            | 28.5                            | 25.0                               | -2.8                                  | 29.2             | 12.3                           | 31.1                            | 27.8                               |
| C8  | -25.2                             | 6.4              | -10.7                          | 8.0                             | 5.1                                | -29.5                               | 3.0              | -14.4                          | 4.2                             | 0.7                                | -26.3                                 | 5.8              | -11.2                          | 7.6                             | 4.3                                |
| C9  | -3.9                              | 27.7             | 10.6                           | 29.3                            | 26.4                               | -7.7                                | 24.8             | 7.4                            | 26.0                            | 22.5                               | -5.2                                  | 26.9             | 9.9                            | 28.8                            | 25.4                               |
| C10 | -1.2                              | 30.4             | 13.3                           | 31.9                            | 29.0                               | -5.6                                | 26.9             | 9.5                            | 28.1                            | 24.6                               | -2.7                                  | 29.4             | 12.4                           | 31.2                            | 27.9                               |
| C14 | -6.8                              | 24.8             | 7.7                            | 26.4                            | 23.5                               | -9.8                                | 22.7             | 5.3                            | 24.0                            | 20.4                               | -7.6                                  | 24.4             | 7.4                            | 26.3                            | 22.9                               |
| C15 | -3.9                              | 27.6             | 10.6                           | 29.2                            | 26.4                               | -7.9                                | 24.6             | 7.2                            | 25.8                            | 22.3                               | -5.3                                  | 26.8             | 9.8                            | 28.6                            | 25.3                               |
| C17 | -24.7                             | 6.9              | -10.2                          | 8.5                             | 5.6                                | -29.3                               | 3.2              | -14.2                          | 4.4                             | 0.9                                | -25.9                                 | 6.1              | -10.8                          | 8.0                             | 4.7                                |
| C18 | -4.2                              | 27.4             | 10.3                           | 29.0                            | 26.1                               | -8.4                                | 24.1             | 6.7                            | 25.4                            | 21.8                               | -5.6                                  | 26.5             | 9.5                            | 28.3                            | 25.0                               |
| C19 | -2.9                              | 28.7             | 11.6                           | 30.3                            | 27.4                               | -8.7                                | 23.8             | 6.4                            | 25.1                            | 21.5                               | -4.8                                  | 27.3             | 10.3                           | 29.2                            | 25.8                               |

**Table S2.**  $\Delta G^{\circ}_{\text{HAT}}$  (kcal mol<sup>-1</sup>) in gas-phase, water and benzene, for the scavenging of HO<sup>•</sup>, HOO<sup>•</sup>, CH<sub>3</sub>O<sup>•</sup>, CH<sub>3</sub>OO<sup>•</sup> and CH<sub>2</sub>=CHOO<sup>•</sup> radicals through HAT from C4 for **1** and its metabolites. Level of theory: (SMD)-M06-2X/6-311+G(d,p)//M06-2X/6-31G(d).

|             | $\Delta G^{\circ}_{\text{HAT,gas}}$ |                  |                                |                                 |                                    | $\Delta G^{\circ}_{\text{HAT,water}}$ |                  |                                |                                 |                                    | $\Delta G^{\circ}_{\text{HAT,benzene}}$ |                  |                                |                                 |                                    |
|-------------|-------------------------------------|------------------|--------------------------------|---------------------------------|------------------------------------|---------------------------------------|------------------|--------------------------------|---------------------------------|------------------------------------|-----------------------------------------|------------------|--------------------------------|---------------------------------|------------------------------------|
|             | HO <sup>•</sup>                     | HOO <sup>•</sup> | CH <sub>3</sub> O <sup>•</sup> | CH <sub>3</sub> OO <sup>•</sup> | CH <sub>2</sub> =CHOO <sup>•</sup> | HO <sup>•</sup>                       | HOO <sup>•</sup> | CH <sub>3</sub> O <sup>•</sup> | CH <sub>3</sub> OO <sup>•</sup> | CH <sub>2</sub> =CHOO <sup>•</sup> | HO <sup>•</sup>                         | HOO <sup>•</sup> | CH <sub>3</sub> O <sup>•</sup> | CH <sub>3</sub> OO <sup>•</sup> | CH <sub>2</sub> =CHOO <sup>•</sup> |
| <b>1</b>    | -33.3                               | -1.7             | -18.8                          | -0.1                            | -3.0                               | -34.4                                 | -1.9             | -19.3                          | -0.7                            | -4.2                               | -33.8                                   | -1.7             | -18.7                          | -0.1                            | -3.2                               |
| <b>MI</b>   | -35.4                               | -3.8             | -20.8                          | -2.2                            | -5.1                               | -34.6                                 | -2.1             | -19.5                          | -0.9                            | -4.4                               | -34.8                                   | -2.7             | -19.7                          | -0.9                            | -4.2                               |
| <b>MII</b>  | -34.9                               | -3.3             | -20.4                          | -1.7                            | -4.6                               | -34.2                                 | -1.8             | -19.2                          | -0.5                            | -4.1                               | -34.3                                   | -2.3             | -19.3                          | -0.4                            | -3.8                               |
| <b>MIII</b> | -34.7                               | -3.1             | -20.2                          | -1.5                            | -4.4                               | -34.0                                 | -1.5             | -18.9                          | -0.2                            | -3.8                               | -34.1                                   | -2.1             | -19.1                          | -0.2                            | -3.6                               |
| <b>MIV</b>  | -35.5                               | -3.9             | -20.1                          | -2.3                            | -5.2                               | -35.2                                 | -2.7             | -20.1                          | -1.4                            | -5.0                               | -35.0                                   | -3.0             | -20.0                          | -1.1                            | -4.5                               |
| <b>MX</b>   | -36.4                               | -4.8             | -21.9                          | -3.2                            | -6.8                               | -35.7                                 | -3.3             | -20.7                          | -2.0                            | -5.6                               | -35.9                                   | -3.8             | -20.8                          | -2.0                            | -5.3                               |
| <b>MXI</b>  | -37.0                               | -5.4             | -22.5                          | -3.8                            | -6.7                               | -36.5                                 | -4.0             | -21.4                          | -2.7                            | -6.3                               | -36.1                                   | -4.1             | -21.0                          | -2.2                            | -5.6                               |

**Table S3.**  $\Delta G^\circ_{\text{HAT}}$  (kcal mol<sup>-1</sup>) in gas-phase, water and benzene, for the scavenging of HO<sup>•</sup>, HOO<sup>•</sup>, CH<sub>3</sub>O<sup>•</sup>, CH<sub>3</sub>OO<sup>•</sup> and CH<sub>2</sub>=CHOO<sup>•</sup> radicals through HAT from neutral Trolox (see Scheme 1 in the text). For comparison the values of HAT from C4 of zolpidem **1** are also included. Level of theory: (SMD)-M06-2X/6-311+G(d,p)//M06-2X/6-31G(d).

|          | $\Delta G^\circ_{\text{HAT,gas}}$ |                  |                                |                                 |                                    | $\Delta G^\circ_{\text{HAT,water}}$ |                  |                                |                                 |                                    | $\Delta G^\circ_{\text{HAT,benzene}}$ |                  |                                |                                 |                                    |
|----------|-----------------------------------|------------------|--------------------------------|---------------------------------|------------------------------------|-------------------------------------|------------------|--------------------------------|---------------------------------|------------------------------------|---------------------------------------|------------------|--------------------------------|---------------------------------|------------------------------------|
|          | HO <sup>•</sup>                   | HOO <sup>•</sup> | CH <sub>3</sub> O <sup>•</sup> | CH <sub>3</sub> OO <sup>•</sup> | CH <sub>2</sub> =CHOO <sup>•</sup> | HO <sup>•</sup>                     | HOO <sup>•</sup> | CH <sub>3</sub> O <sup>•</sup> | CH <sub>3</sub> OO <sup>•</sup> | CH <sub>2</sub> =CHOO <sup>•</sup> | HO <sup>•</sup>                       | HOO <sup>•</sup> | CH <sub>3</sub> O <sup>•</sup> | CH <sub>3</sub> OO <sup>•</sup> | CH <sub>2</sub> =CHOO <sup>•</sup> |
| C1       | -28.3                             | 3.3              | -13.8                          | 4.9                             | 2.0                                | -31.0                               | 1.5              | -15.9                          | 2.8                             | -0.8                               | -28.6                                 | 3.5              | -13.5                          | 5.3                             | 2.0                                |
| C2       | -27.4                             | 4.2              | -12.9                          | 5.8                             | 2.9                                | -29.5                               | 2.9              | -14.4                          | 4.2                             | 0.6                                | -27.3                                 | 4.7              | -12.3                          | 6.6                             | 3.3                                |
| C3       | -27.7                             | 3.9              | -13.2                          | 5.4                             | 2.6                                | -30.4                               | 2.1              | -15.3                          | 3.3                             | -0.2                               | -27.9                                 | 4.1              | -12.9                          | 6.0                             | 2.6                                |
| C4       | -16.6                             | 15.0             | -2.1                           | 16.6                            | 13.7                               | -19.0                               | 13.5             | -3.9                           | 14.7                            | 11.2                               | -16.9                                 | 15.2             | -1.8                           | 17.0                            | 13.7                               |
| C5       | -19.4                             | 12.2             | -4.9                           | 13.8                            | 10.9                               | -21.7                               | 10.7             | -6.6                           | 12.0                            | 8.5                                | -19.7                                 | 12.4             | -4.6                           | 14.2                            | 10.9                               |
| C6       | -31.4                             | 0.2              | -16.9                          | 1.8                             | -1.2                               | -33.5                               | -1.0             | -18.4                          | 0.2                             | -3.3                               | -31.7                                 | 0.3              | -16.7                          | 2.2                             | -1.2                               |
| O1       | -38.7                             | -7.1             | -24.2                          | -5.5                            | -8.4                               | -41.7                               | -9.3             | -26.7                          | -8.0                            | -11.6                              | -39.9                                 | -7.8             | -24.8                          | -6.0                            | -9.3                               |
| O2       | -6.6                              | 25.0             | 8.0                            | 26.6                            | 23.7                               | -5.6                                | 26.9             | 9.5                            | 28.2                            | 24.6                               | -7.2                                  | 24.9             | 7.9                            | 26.7                            | 23.4                               |
| <b>1</b> | -33.3                             | -1.7             | -18.8                          | -0.1                            | -3.0                               | -34.4                               | -1.9             | -19.3                          | -0.7                            | -4.2                               | -33.8                                 | -1.7             | -18.7                          | -0.1                            | -3.2                               |

**Figure S1.** Conformers of melatonin 2 considered in this work.

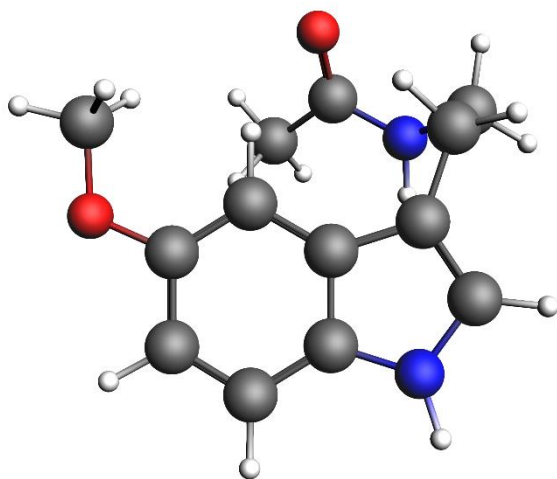

**Conformer 2a**

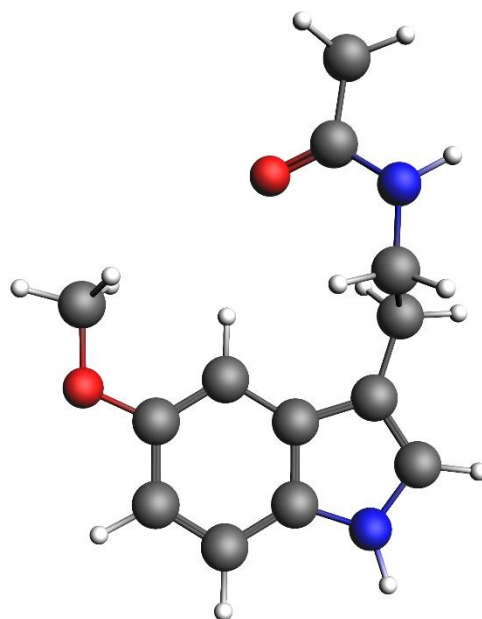

**Conformer 2b**

**Table S4.**  $\Delta G^\circ_{\text{HAT}}$  (kcal mol<sup>-1</sup>) in gas-phase, water and benzene, for the scavenging of HO<sup>•</sup>, HOO<sup>•</sup>, CH<sub>3</sub>O<sup>•</sup>, CH<sub>3</sub>OO<sup>•</sup> and CH<sub>2</sub>=CHOO<sup>•</sup> radicals through HAT from C4 site of melatonin **2** (see Scheme 1 in the text). Two lowest energy conformers of melatonin, **2a** and **2b**, have been considered (Figure S1)<sup>[a]</sup>. Level of theory: (SMD)-M06-2X/6-311+G(d,p)//M06-2X/6-31G(d).

|           | $\Delta G^\circ_{\text{HAT,gas}}$ |                  |                                |                                 |                                    | $\Delta G^\circ_{\text{HAT,water}}$ |                  |                                |                                 |                                    | $\Delta G^\circ_{\text{HAT,benzene}}$ |                  |                                |                                 |                                    |
|-----------|-----------------------------------|------------------|--------------------------------|---------------------------------|------------------------------------|-------------------------------------|------------------|--------------------------------|---------------------------------|------------------------------------|---------------------------------------|------------------|--------------------------------|---------------------------------|------------------------------------|
|           | HO <sup>•</sup>                   | HOO <sup>•</sup> | CH <sub>3</sub> O <sup>•</sup> | CH <sub>3</sub> OO <sup>•</sup> | CH <sub>2</sub> =CHOO <sup>•</sup> | HO <sup>•</sup>                     | HOO <sup>•</sup> | CH <sub>3</sub> O <sup>•</sup> | CH <sub>3</sub> OO <sup>•</sup> | CH <sub>2</sub> =CHOO <sup>•</sup> | HO <sup>•</sup>                       | HOO <sup>•</sup> | CH <sub>3</sub> O <sup>•</sup> | CH <sub>3</sub> OO <sup>•</sup> | CH <sub>2</sub> =CHOO <sup>•</sup> |
| <b>2a</b> | -28.9                             | 2.8              | -14.3                          | 4.3                             | 1.5                                | -33.8                               | -1.3             | -18.7                          | -0.1                            | -3.6                               | -31.3                                 | 0.8              | -16.2                          | 2.7                             | -0.7                               |
| <b>2b</b> | -28.6                             | 3.0              | -14.1                          | 4.5                             | 1.7                                | -31.0                               | 1.4              | -16.0                          | 2.7                             | -0.9                               | -29.1                                 | 3.0              | -14.0                          | 4.9                             | 1.5                                |
| <b>1</b>  | -33.3                             | -1.7             | -18.8                          | -0.1                            | -3.0                               | -34.4                               | -1.9             | -19.3                          | -0.7                            | -4.2                               | -33.8                                 | -1.7             | -18.7                          | -0.1                            | -3.2                               |

[a] Fogueri UR, Kozuch S, Karton A, Martin JML. The Melatonin Conformer Space: Benchmark and Assessment of Wave Function and DFT Methods for a Paradigmatic Biological and Pharmacological Molecule. *J Phys Chem A* 2013;117:2269–77.

**Table S5.**  $\Delta G^\circ_{\text{HAT}}$  (kcal mol<sup>-1</sup>) in gas-phase, water and benzene, for the scavenging of HO<sup>•</sup>, HOO<sup>•</sup>, CH<sub>3</sub>O<sup>•</sup>, CH<sub>3</sub>OO<sup>•</sup> and CH<sub>2</sub>=CHOO<sup>•</sup> radicals through HAT from the OH or COOH sites of zolpidem metabolites (see Scheme 3 in the text). For comparison the values of HAT from C4 of zolpidem **1** are also included. Level of theory: (SMD)-M06-2X/6-311+G(d,p)//M06-2X/6-31G(d).

|            | $\Delta G^\circ_{\text{HAT,gas}}$ |                  |                                |                                 |                                    | $\Delta G^\circ_{\text{HAT,water}}$ |                  |                                |                                 |                                    | $\Delta G^\circ_{\text{HAT,benzene}}$ |                  |                                |                                 |                                    |
|------------|-----------------------------------|------------------|--------------------------------|---------------------------------|------------------------------------|-------------------------------------|------------------|--------------------------------|---------------------------------|------------------------------------|---------------------------------------|------------------|--------------------------------|---------------------------------|------------------------------------|
|            | HO <sup>•</sup>                   | HOO <sup>•</sup> | CH <sub>3</sub> O <sup>•</sup> | CH <sub>3</sub> OO <sup>•</sup> | CH <sub>2</sub> =CHOO <sup>•</sup> | HO <sup>•</sup>                     | HOO <sup>•</sup> | CH <sub>3</sub> O <sup>•</sup> | CH <sub>3</sub> OO <sup>•</sup> | CH <sub>2</sub> =CHOO <sup>•</sup> | HO <sup>•</sup>                       | HOO <sup>•</sup> | CH <sub>3</sub> O <sup>•</sup> | CH <sub>3</sub> OO <sup>•</sup> | CH <sub>2</sub> =CHOO <sup>•</sup> |
| <b>1</b>   | -33.3                             | -1.7             | -18.8                          | -0.1                            | -3.0                               | -34.4                               | -1.9             | -19.3                          | -0.7                            | -4.2                               | -33.8                                 | -1.7             | -18.7                          | -0.1                            | -3.2                               |
| <b>MI</b>  | -5.0                              | 26.6             | 9.5                            | 28.2                            | 25.3                               | -5.3                                | 27.2             | 9.8                            | 28.4                            | 25.3                               | -5.6                                  | 26.4             | 9.4                            | 28.3                            | 25.0                               |
| <b>MI</b>  | 5.6                               | 37.2             | 20.1                           | 38.8                            | 35.9                               | 4.4                                 | 36.8             | 19.4                           | 38.1                            | 34.5                               | 5.1                                   | 37.1             | 20.2                           | 39.0                            | 35.6                               |
| <b>MI</b>  | -14.1                             | 17.5             | 0.4                            | 19.1                            | 16.2                               | -15.0                               | 17.4             | 0.08                           | 18.7                            | 15.2                               | -14.8                                 | 17.2             | 0.2                            | 19.1                            | 15.7                               |
| <b>MI</b>  | -14.5                             | 17.1             | 0.01                           | 18.7                            | 15.8                               | -15.2                               | 17.2             | -0.1                           | 18.5                            | 15.0                               | -15.2                                 | 16.8             | -0.1                           | 18.7                            | 15.4                               |
| <b>MX</b>  | -37.3                             | -5.7             | -22.8                          | -4.1                            | -7.0                               | -40.8                               | -8.3             | -25.7                          | -7.1                            | -10.6                              | -38.6                                 | -6.5             | -23.5                          | -4.7                            | -8.0                               |
| <b>MXI</b> | -14.0                             | 17.6             | 0.5                            | 19.2                            | 16.3                               | -14.6                               | 17.9             | 0.5                            | 19.2                            | 15.6                               | -14.5                                 | 17.6             | 0.6                            | 19.4                            | 16.1                               |



**Table S6.**  $\Delta G^{\ddagger}_{\text{HAT}}$  (kcal mol<sup>-1</sup>) in gas-phase, water and benzene, for the scavenging of HO<sup>•</sup>, HOO<sup>•</sup>, CH<sub>3</sub>O<sup>•</sup>, CH<sub>3</sub>OO<sup>•</sup> and CH<sub>2</sub>=CHOO<sup>•</sup> through HAT from the OH or COOH sites of zolpidem metabolites (see Scheme 3 in the text). For comparison the values of HAT from C4 of zolpidem **1** are also included. Level of theory: (SMD)-M06-2X/6-311+G(d,p)//M06-2X/6-31G(d).

|             | $\Delta G^{\ddagger}_{\text{HAT,gas}}$ |                                |                                 | $\Delta G^{\ddagger}_{\text{HAT,water}}$ |                                |                                 | $\Delta G^{\ddagger}_{\text{HAT,benzene}}$ |                                |                                 |
|-------------|----------------------------------------|--------------------------------|---------------------------------|------------------------------------------|--------------------------------|---------------------------------|--------------------------------------------|--------------------------------|---------------------------------|
|             | HO <sup>•</sup>                        | CH <sub>3</sub> O <sup>•</sup> | CH <sub>3</sub> OO <sup>•</sup> | HO <sup>•</sup>                          | CH <sub>3</sub> O <sup>•</sup> | CH <sub>3</sub> OO <sup>•</sup> | HO <sup>•</sup>                            | CH <sub>3</sub> O <sup>•</sup> | CH <sub>3</sub> OO <sup>•</sup> |
| <b>MI</b>   | 8.9                                    | 22.9                           | 35.6                            | 13.7                                     | 26.8                           | 39.9                            | 10.6                                       | 24.7                           | 37.7                            |
| <b>MII</b>  | 12.6                                   | 21.5                           | 33.7                            | 19.7                                     | 26.3                           | 37.3                            | 15.0                                       | 23.4                           | 35.6                            |
| <b>MIII</b> | 9.9                                    | 16.2                           | 27.3                            | 14.2                                     | 20.4                           | 30.9                            | 11.3                                       | 18.1                           | 29.3                            |
| <b>MIV</b>  | 8.6                                    | 15.9                           | 30.9                            | 14.2                                     | 20.9                           | 33.3                            | 10.5                                       | 17.9                           | 32.6                            |
| <b>MX</b>   | 4.0                                    | 8.7                            | 19.8                            | 5.6                                      | 16.1                           | 15.1                            | 5.3                                        | 10.2                           | 21.1                            |
| <b>MXI</b>  | 9.8                                    | 16.0                           | -                               | 14.6                                     | 20.5                           |                                 | 11.9                                       | 18.7                           |                                 |
| <b>1</b>    | 5.4                                    | 9.4                            | 19.3                            | 7.8                                      | 11.4                           | 21.7                            | 7.2                                        | 11.9                           | 22.9                            |

**Table S7.** Coordinates and energies of the structures of melatonin and melatonin radicals at the C4 site. Level of theory: M06-2X/6-31G(d).

|                       |              |              |                               |                       |              |              |              |
|-----------------------|--------------|--------------|-------------------------------|-----------------------|--------------|--------------|--------------|
| <b>Melatonin</b>      |              |              | H                             | 5.075471000           | 1.700333000  | 0.239744000  |              |
| Conformer 2a          |              |              | <b>Melatonin radical (C4)</b> |                       |              |              |              |
| E = -764.661776389 Ha |              |              | Conformer 2a                  |                       |              |              |              |
| N                     | -0.186892000 | 3.158686000  | 0.348801000                   | E = -764.004880659 Ha |              |              |              |
| C                     | 1.027742000  | 2.856951000  | -0.228284000                  | N                     | -0.522161000 | 2.985347000  | 0.199040000  |
| C                     | 1.029094000  | 1.559062000  | -0.666709000                  | C                     | 0.614264000  | 2.225066000  | 0.290763000  |
| C                     | -0.268349000 | 1.028496000  | -0.346754000                  | C                     | 0.327525000  | 0.897199000  | -0.050722000 |
| C                     | -0.849285000 | -0.235918000 | -0.558760000                  | C                     | -1.095472000 | 0.886316000  | -0.373480000 |
| C                     | -2.139458000 | -0.445991000 | -0.104076000                  | C                     | -1.962222000 | -0.136183000 | -0.785141000 |
| C                     | -2.865321000 | 0.587222000  | 0.537163000                   | C                     | -3.292933000 | 0.183057000  | -1.016932000 |
| C                     | -2.313807000 | 1.836441000  | 0.734219000                   | C                     | -3.764496000 | 1.502452000  | -0.842363000 |
| C                     | -1.003267000 | 2.049703000  | 0.286273000                   | C                     | -2.920779000 | 2.517087000  | -0.437788000 |
| H                     | -0.452884000 | 4.061685000  | 0.706699000                   | C                     | -1.580959000 | 2.193123000  | -0.206222000 |
| H                     | 1.806614000  | 3.605436000  | -0.284977000                  | H                     | -0.573243000 | 3.974656000  | 0.381971000  |
| H                     | -0.279149000 | -1.017553000 | -1.049555000                  | H                     | 1.549205000  | 2.675451000  | 0.589179000  |
| H                     | -3.874228000 | 0.363001000  | 0.866202000                   | H                     | -1.588829000 | -1.145090000 | -0.918325000 |
| H                     | -2.882059000 | 2.622020000  | 1.223192000                   | H                     | -4.814206000 | 1.691010000  | -1.039166000 |
| O                     | -2.803339000 | -1.633037000 | -0.216355000                  | H                     | -3.291190000 | 3.529154000  | -0.306956000 |
| C                     | -2.148286000 | -2.659301000 | -0.930437000                  | O                     | -4.241389000 | -0.709936000 | -1.421093000 |
| H                     | -1.191602000 | -2.364637000 | -0.467408000                  | C                     | -3.827106000 | -2.040380000 | -1.620748000 |
| H                     | -1.958183000 | -2.358484000 | -1.968190000                  | H                     | -3.439427000 | -2.481677000 | -0.693752000 |
| H                     | -2.820953000 | -3.516970000 | -0.915399000                  | H                     | -3.055331000 | -2.106245000 | -2.398040000 |
| C                     | 2.146990000  | 0.771194000  | -1.278663000                  | H                     | -4.711740000 | -2.590828000 | -1.941110000 |
| C                     | 3.048887000  | 0.099942000  | -0.226611000                  | C                     | 1.189958000  | -0.206666000 | -0.082988000 |
| N                     | 2.320971000  | -0.620136000 | 0.803814000                   | C                     | 2.644470000  | -0.148627000 | 0.245593000  |
| C                     | 1.686147000  | -1.795303000 | 0.535486000                   | N                     | 2.981944000  | -1.086842000 | 1.308657000  |
| C                     | 0.828794000  | -2.333053000 | 1.663911000                   | C                     | 4.136628000  | -1.808885000 | 1.302167000  |
| H                     | 2.774853000  | 1.405656000  | -1.914600000                  | C                     | 4.323878000  | -2.751789000 | 2.476887000  |
| H                     | 1.729516000  | -0.012859000 | -1.918872000                  | H                     | 0.793214000  | -1.173243000 | -0.380203000 |
| H                     | 3.658145000  | 0.855109000  | 0.278847000                   | H                     | 2.942436000  | 0.868860000  | 0.529537000  |
| H                     | 3.720687000  | -0.609567000 | -0.717104000                  | H                     | 3.271888000  | -0.434788000 | -0.606591000 |
| H                     | 2.011546000  | -0.095817000 | 1.610190000                   | H                     | 2.326489000  | -1.191368000 | 2.069145000  |
| O                     | 1.790409000  | -2.364637000 | -0.541363000                  | O                     | 4.970395000  | -1.712815000 | 0.417924000  |
| H                     | -0.165371000 | -1.875825000 | 1.601778000                   | H                     | 4.507356000  | -3.755365000 | 2.087318000  |
| H                     | 1.252591000  | -2.111605000 | 2.646874000                   | H                     | 3.470434000  | -2.779226000 | 3.158375000  |
| H                     | 0.727656000  | -3.411781000 | 1.541215000                   | H                     | 5.214754000  | -2.445341000 | 3.030211000  |
| Conformer 2b          |              |              | Conformer 2b                  |                       |              |              |              |
| E = -764.659393102 Ha |              |              | E = -764.011241254 Ha         |                       |              |              |              |
| N                     | -2.498515000 | -2.484134000 | -0.043777000                  | N                     | -2.191873000 | -2.404178000 | -0.609581000 |
| C                     | -1.205918000 | -2.919814000 | -0.240694000                  | C                     | -1.120280000 | -3.002777000 | -0.011268000 |
| C                     | -0.360501000 | -1.847183000 | -0.319845000                  | C                     | -0.218184000 | -2.035520000 | 0.443701000  |
| C                     | -1.177808000 | -0.674954000 | -0.160506000                  | C                     | -0.821494000 | -0.750034000 | 0.091007000  |
| C                     | -0.859523000 | 0.695594000  | -0.154397000                  | C                     | -0.445885000 | 0.590128000  | 0.299115000  |
| C                     | -1.894358000 | 1.596544000  | 0.027540000                   | C                     | -1.288347000 | 1.593726000  | -0.163195000 |
| C                     | -3.229071000 | 1.154433000  | 0.194454000                   | C                     | -2.493856000 | 1.286369000  | -0.831487000 |
| C                     | -3.550414000 | -0.18774000  | 0.185839000                   | C                     | -2.881712000 | -0.021540000 | -1.033093000 |
| C                     | -2.506839000 | -1.105205000 | 0.007813000                   | C                     | -2.037447000 | -1.030102000 | -0.560859000 |
| H                     | -3.308156000 | -3.077940000 | 0.030866000                   | H                     | -2.982172000 | -2.885443000 | -1.008018000 |
| H                     | -0.989243000 | -3.976806000 | -0.314955000                  | H                     | -1.046515000 | -4.078893000 | 0.054787000  |
| H                     | 0.171765000  | 1.011682000  | -0.282559000                  | H                     | 0.466288000  | 0.842652000  | 0.825169000  |
| H                     | -3.994787000 | 1.910577000  | 0.331081000                   | H                     | -3.107588000 | 2.113739000  | -1.170661000 |
| H                     | -4.578576000 | -0.512706000 | 0.314508000                   | H                     | -3.814785000 | -0.255379000 | -1.536757000 |
| O                     | -1.727597000 | 2.949974000  | 0.064899000                   | O                     | -1.045076000 | 2.924490000  | -0.017626000 |
| C                     | -0.406158000 | 3.422665000  | -0.084629000                  | C                     | 0.114677000  | 3.295240000  | 0.700217000  |
| H                     | 0.012866000  | 3.138904000  | -1.057738000                  | H                     | 1.029695000  | 2.939881000  | 0.214151000  |
| H                     | 0.252302000  | 3.030567000  | 0.699845000                   | H                     | 0.095953000  | 2.896317000  | 1.721645000  |
| H                     | -0.462395000 | 4.509118000  | -0.011640000                  | H                     | 0.111899000  | 4.384861000  | 0.732543000  |
| C                     | 1.124162000  | -1.804598000 | -0.498237000                  | C                     | 0.999571000  | -2.321774000 | 1.088103000  |
| C                     | 1.823122000  | -1.306134000 | 0.778658000                   | C                     | 2.034767000  | -1.296091000 | 1.419954000  |
| N                     | 3.179923000  | -0.843562000 | 0.542219000                   | N                     | 2.568264000  | -0.671764000 | 0.207178000  |
| C                     | 3.405418000  | 0.395199000  | 0.030075000                   | C                     | 2.839623000  | 0.654835000  | 0.126014000  |
| C                     | 4.853641000  | 0.748035000  | -0.245900000                  | C                     | 3.158844000  | 1.166280000  | -1.264310000 |
| H                     | 1.371669000  | -1.102364000 | -1.304124000                  | H                     | 1.230474000  | -3.362671000 | 1.291791000  |
| H                     | 1.519552000  | -2.785171000 | -0.786468000                  | H                     | 2.849844000  | -1.754753000 | 1.989827000  |
| H                     | 1.846944000  | -2.092945000 | 1.537575000                   | H                     | 1.641451000  | -0.478965000 | 2.036640000  |
| H                     | 1.262595000  | -0.463220000 | 1.190904000                   | H                     | 2.543890000  | -1.221299000 | -0.640334000 |
| H                     | 3.950787000  | -1.487478000 | 0.632689000                   | O                     | 2.769414000  | 1.402376000  | 1.093116000  |
| O                     | 2.500110000  | 1.186277000  | -0.195150000                  | H                     | 2.220276000  | 1.470289000  | -1.741189000 |
| H                     | 4.980182000  | 0.888896000  | -1.322227000                  | H                     | 3.638958000  | 0.412604000  | -1.893456000 |
| H                     | 5.560925000  | -0.008177000 | 0.102306000                   | H                     | 3.803350000  | 2.041201000  | -1.178487000 |

**Table S8.** Coordinates and energies of the structures of zolpidem and zolpidem radicals at each available site. Level of theory: M06-2X/6-31G(d).

**ZPD**

E = -975.763621119 Ha

|   |              |              |              |
|---|--------------|--------------|--------------|
| C | 4.290733000  | -0.700993000 | 0.137452000  |
| N | 0.537576000  | -2.298214000 | -0.378156000 |
| C | -0.179679000 | -1.192718000 | -0.029876000 |
| C | 0.644796000  | -0.139296000 | 0.335987000  |
| C | 4.204305000  | -2.068153000 | -0.278904000 |
| C | 2.998670000  | -2.672626000 | -0.483054000 |
| C | 1.806075000  | -1.940139000 | -0.257723000 |
| N | 1.924350000  | -0.617558000 | 0.168061000  |
| C | 3.140569000  | -0.001233000 | 0.341537000  |
| H | -1.830669000 | -0.849750000 | -0.718635000 |
| H | 2.906923000  | -3.700748000 | -0.812674000 |
| C | 5.634341000  | -0.047069000 | 0.314434000  |
| H | 6.209751000  | -0.077055000 | -0.616540000 |
| H | 5.530087000  | 0.998993000  | 0.612416000  |
| H | 6.223320000  | -0.562067000 | 1.080759000  |
| C | -1.649255000 | -1.187912000 | -0.047444000 |
| C | -2.360273000 | -2.351828000 | 0.266879000  |
| C | -3.747778000 | -2.350715000 | 0.264405000  |
| C | -4.472663000 | -1.196046000 | -0.053046000 |
| C | -3.760258000 | -0.045347000 | -0.390092000 |
| C | -2.367505000 | -0.040371000 | -0.395899000 |
| H | -1.802771000 | -3.251621000 | 0.507513000  |
| H | -4.285620000 | -3.262753000 | 0.513214000  |
| H | -6.376011000 | -2.053382000 | -0.604365000 |
| H | -4.301861000 | 0.854226000  | -0.673870000 |
| C | -5.979917000 | -1.207974000 | -0.033221000 |
| H | -6.359717000 | -1.300052000 | 0.990236000  |
| H | -6.389872000 | -0.289123000 | -0.460432000 |
| C | 0.331492000  | 1.174331000  | 0.970212000  |
| H | -0.672180000 | 1.110451000  | 1.393145000  |
| H | 1.020216000  | 1.355635000  | 1.808562000  |
| C | 0.500493000  | 2.347533000  | 0.005114000  |
| H | 0.465232000  | 4.201065000  | -1.624181000 |
| H | -0.085876000 | 5.329311000  | -0.362419000 |
| N | -0.493190000 | 3.282718000  | -0.032369000 |
| H | -2.265014000 | 2.476366000  | 0.826219000  |
| O | 1.501435000  | 2.414834000  | -0.693971000 |
| C | -0.337835000 | 4.421742000  | -0.923851000 |
| H | -1.269365000 | 4.591999000  | -1.471559000 |
| C | -1.588257000 | 3.331022000  | 0.928438000  |
| H | -1.225796000 | 3.374353000  | 1.961004000  |
| H | -2.162798000 | 4.238945000  | 0.738349000  |
| H | 5.125308000  | -2.619000000 | -0.448159000 |
| H | 3.105744000  | 1.054185000  | 0.582346000  |

**C1**

E = -975.103960631 Ha

|   |              |              |              |
|---|--------------|--------------|--------------|
| C | 4.286065000  | -0.676534000 | 0.138266000  |
| N | 0.532738000  | -2.279802000 | -0.361188000 |
| C | -0.184314000 | -1.169984000 | -0.027530000 |
| C | 0.640207000  | -0.112916000 | 0.326680000  |
| C | 4.199643000  | -2.048487000 | -0.262167000 |
| C | 2.994206000  | -2.655612000 | -0.459531000 |
| C | 1.801401000  | -1.920680000 | -0.243574000 |
| N | 1.919674000  | -0.593244000 | 0.166691000  |
| C | 3.135658000  | 0.025095000  | 0.333940000  |
| H | -1.825341000 | 0.859974000  | -0.766646000 |
| H | 2.902878000  | -3.687532000 | -0.777140000 |
| C | 5.629587000  | -0.020696000 | 0.308292000  |
| H | 6.204849000  | -0.060890000 | -0.622348000 |
| H | 5.525557000  | 1.028544000  | 0.594913000  |
| H | 6.218377000  | -0.527530000 | 1.080133000  |
| C | -1.653894000 | -1.161613000 | -0.047793000 |
| C | -2.370010000 | -2.315411000 | 0.290820000  |
| C | -3.757548000 | -2.308529000 | 0.285970000  |
| C | -4.477277000 | -1.158311000 | -0.058356000 |
| C | -3.759843000 | -0.018189000 | -0.420040000 |
| C | -2.367137000 | -0.019330000 | -0.422916000 |
| H | -1.816768000 | -3.212098000 | 0.552082000  |
| H | -4.299553000 | -3.212680000 | 0.553716000  |
| H | -6.382653000 | -2.020719000 | -0.593925000 |
| H | -4.297346000 | 0.876364000  | -0.726483000 |
| C | -5.984571000 | -1.164014000 | -0.041371000 |

|   |              |              |              |
|---|--------------|--------------|--------------|
| H | -6.366660000 | -1.231358000 | 0.983147000  |
| H | -6.390175000 | -0.253645000 | -0.490282000 |
| C | 0.325096000  | 1.207882000  | 0.944780000  |
| H | -0.683265000 | 1.146921000  | 1.356963000  |
| H | 1.003424000  | 1.392131000  | 1.791907000  |
| C | 0.501338000  | 2.369058000  | -0.027985000 |
| H | 0.492695000  | 4.363803000  | -1.619370000 |
| N | -0.460728000 | 3.362739000  | -0.034735000 |
| H | -2.270033000 | 2.556351000  | 0.732840000  |
| O | 1.473669000  | 2.420508000  | -0.765280000 |
| C | -0.308525000 | 4.425459000  | -0.902741000 |
| H | -1.121229000 | 5.129524000  | -0.984790000 |
| C | -1.572349000 | 3.379042000  | 0.915133000  |
| H | -1.209477000 | 3.319984000  | 1.944266000  |
| H | -2.105343000 | 4.322003000  | 0.797681000  |
| H | 5.120756000  | -2.601152000 | -0.424594000 |
| H | 3.101770000  | 1.082713000  | 0.565533000  |

**C2**

E = -975.105411808 Ha

|   |              |              |              |
|---|--------------|--------------|--------------|
| C | 4.268362000  | -0.746509000 | 0.156597000  |
| N | 0.487113000  | -2.239667000 | -0.450451000 |
| C | -0.213194000 | -1.140330000 | -0.051982000 |
| C | 0.631026000  | -0.118553000 | 0.359924000  |
| C | 4.156504000  | -2.088481000 | -0.328884000 |
| C | 2.939620000  | -2.656504000 | -0.567715000 |
| C | 1.761394000  | -1.911124000 | -0.311925000 |
| N | 1.903314000  | -0.612124000 | 0.174572000  |
| C | 3.131704000  | -0.033073000 | 0.388336000  |
| H | -1.880692000 | 0.969909000  | -0.524133000 |
| H | 2.827701000  | -3.665584000 | -0.946265000 |
| C | 5.623861000  | -0.131909000 | 0.378439000  |
| H | 6.208718000  | -0.129667000 | -0.547103000 |
| H | 5.539067000  | 0.900563000  | 0.725878000  |
| H | 6.193076000  | -0.696197000 | 1.124697000  |
| C | -1.683361000 | -1.125321000 | -0.053881000 |
| C | -2.391747000 | -2.313302000 | 0.165029000  |
| C | -3.778688000 | -2.311489000 | 0.185082000  |
| C | -4.506208000 | -1.131289000 | -0.010467000 |
| C | -3.796892000 | 0.044850000  | -0.249814000 |
| C | -2.405052000 | 0.049454000  | -0.281810000 |
| H | -1.831910000 | -3.231185000 | 0.314217000  |
| H | -4.314181000 | -3.242419000 | 0.357236000  |
| H | -6.422312000 | -1.942246000 | -0.588012000 |
| H | -4.337110000 | 0.971448000  | -0.429170000 |
| C | -6.012839000 | -1.143089000 | 0.037718000  |
| H | -6.373107000 | -1.312084000 | 1.058504000  |
| H | -6.428324000 | -0.193687000 | -0.310005000 |
| C | 0.341131000  | 1.179143000  | 1.040329000  |
| H | -0.672420000 | 1.119471000  | 1.436047000  |
| H | 1.020649000  | 1.314280000  | 1.893751000  |
| C | 0.553156000  | 2.369835000  | 0.111272000  |
| H | 0.385733000  | 3.958469000  | -1.816305000 |
| H | 0.229731000  | 5.217152000  | -0.572558000 |
| N | -0.459820000 | 3.298373000  | -0.025289000 |
| O | 1.599904000  | 2.486419000  | -0.509708000 |
| C | -0.252503000 | 4.345739000  | -1.025094000 |
| H | -1.222907000 | 4.635775000  | -1.431410000 |
| C | -1.610401000 | 3.354624000  | 0.737695000  |
| H | -1.658761000 | 2.837624000  | 1.681785000  |
| H | -2.298213000 | 4.156800000  | 0.519445000  |
| H | 5.066772000  | -2.649774000 | -0.520301000 |
| H | 3.119765000  | 1.007908000  | 0.686477000  |

**C4**

E = -975.125687502 Ha

|   |              |              |              |
|---|--------------|--------------|--------------|
| C | 3.871632000  | -1.594305000 | 0.026502000  |
| N | -0.164215000 | -2.369661000 | 0.025471000  |
| C | -0.625621000 | -1.113104000 | -0.032800000 |
| C | 0.434314000  | -0.149150000 | -0.055943000 |
| C | 3.459405000  | -2.957875000 | 0.077398000  |
| C | 2.132381000  | -3.291229000 | 0.069742000  |
| C | 1.167707000  | -2.267477000 | 0.015529000  |
| N | 1.588938000  | -0.943602000 | -0.048621000 |
| C | 2.924225000  | -0.612857000 | -0.034672000 |

|   |              |              |              |
|---|--------------|--------------|--------------|
| H | -1.984449000 | 0.843230000  | -1.397676000 |
| H | 1.780293000  | -4.314828000 | 0.111966000  |
| C | 5.334926000  | -1.241663000 | 0.028076000  |
| H | 5.846082000  | -1.691179000 | -0.829483000 |
| H | 5.479599000  | -0.160182000 | -0.021192000 |
| H | 5.826301000  | -1.611174000 | 0.934217000  |
| C | -2.069457000 | -0.847567000 | -0.064040000 |
| C | -2.931609000 | -1.710485000 | 0.627417000  |
| C | -4.302129000 | -1.504133000 | 0.606095000  |
| C | -4.863230000 | -0.440165000 | -0.110109000 |
| C | -4.004719000 | 0.400244000  | -0.818237000 |
| C | -2.627082000 | 0.202498000  | -0.801606000 |
| H | -2.502568000 | -2.543297000 | 1.175292000  |
| H | -4.955456000 | -2.180205000 | 1.152640000  |
| H | -6.892391000 | -1.147304000 | -0.314018000 |
| H | -4.420464000 | 1.214841000  | -1.405866000 |
| C | -6.353591000 | -0.217131000 | -0.109070000 |
| H | -6.694845000 | 0.149200000  | 0.865456000  |
| H | -6.645576000 | 0.518245000  | -0.863093000 |
| C | 0.292007000  | 1.234382000  | 0.056224000  |
| H | -0.722912000 | 1.547073000  | 0.267278000  |
| C | 1.282448000  | 2.278279000  | -0.196125000 |
| H | 2.559198000  | 4.304090000  | -0.802078000 |
| H | 2.252121000  | 5.139714000  | 0.742252000  |
| N | 0.978853000  | 3.530268000  | 0.286527000  |
| H | -1.067006000 | 4.038624000  | 0.575232000  |
| O | 2.315680000  | 2.085276000  | -0.847408000 |
| C | 1.784575000  | 4.661223000  | -0.126586000 |
| H | 1.164340000  | 5.406329000  | -0.640028000 |
| C | -0.152469000 | 3.819558000  | 1.143613000  |
| H | -0.347199000 | 2.987571000  | 1.822501000  |
| H | 0.087628000  | 4.697131000  | 1.750655000  |
| H | 4.216964000  | -3.735354000 | 0.121797000  |
| H | 3.147582000  | 0.441962000  | -0.118683000 |

### C6

E = -975.073714152 Ha

|   |              |              |              |
|---|--------------|--------------|--------------|
| C | 4.266064000  | -0.763073000 | 0.155431000  |
| N | 0.467741000  | -2.307184000 | -0.378202000 |
| C | -0.227732000 | -1.192067000 | -0.004386000 |
| C | 0.616350000  | -0.167088000 | 0.388923000  |
| C | 4.147517000  | -2.122977000 | -0.298616000 |
| C | 2.934984000  | -2.715812000 | -0.505926000 |
| C | 1.742604000  | -1.987621000 | -0.255558000 |
| N | 1.884736000  | -0.670104000 | 0.210871000  |
| C | 3.103198000  | -0.119478000 | 0.392260000  |
| H | -1.818954000 | 0.907611000  | -0.654334000 |
| H | 2.840942000  | -3.733864000 | -0.863992000 |
| C | 5.611091000  | -0.112060000 | 0.334665000  |
| H | 6.174081000  | -0.121519000 | -0.603893000 |
| H | 5.500015000  | 0.925607000  | 0.654785000  |
| H | 6.205702000  | -0.643037000 | 1.085250000  |
| C | -1.696457000 | -1.150131000 | -0.031632000 |
| C | -2.439503000 | -2.302332000 | 0.248646000  |
| C | -3.826494000 | -2.264670000 | 0.235712000  |
| C | -4.518145000 | -1.083974000 | -0.058780000 |
| C | -3.773347000 | 0.055637000  | -0.362118000 |
| C | -2.381286000 | 0.024501000  | -0.357005000 |
| H | -1.908048000 | -3.222321000 | 0.471226000  |
| H | -4.389984000 | -3.168091000 | 0.457490000  |
| H | -6.439722000 | -1.889194000 | -0.625229000 |
| H | -4.289223000 | 0.975545000  | -0.627753000 |
| C | -6.025266000 | -1.055970000 | -0.049382000 |
| H | -6.414152000 | -1.140110000 | 0.971373000  |
| H | -6.407708000 | -0.125376000 | -0.476678000 |
| C | 0.367079000  | 1.167507000  | 1.000931000  |
| H | -0.646277000 | 1.176990000  | 1.404684000  |
| H | 1.059594000  | 1.320259000  | 1.841581000  |
| C | 0.634374000  | 2.298409000  | 0.005869000  |
| H | 0.759296000  | 4.121610000  | -1.647713000 |
| H | 0.250632000  | 5.327064000  | -0.439621000 |
| N | -0.268769000 | 3.321182000  | -0.037629000 |
| H | -2.140958000 | 2.710413000  | 0.771728000  |
| O | 1.625276000  | 2.252905000  | -0.706823000 |
| C | -0.040989000 | 4.413200000  | -0.970382000 |
| H | -0.953063000 | 4.612156000  | -1.541478000 |
| C | -1.362104000 | 3.468207000  | 0.913673000  |
| H | -1.010453000 | 3.422594000  | 1.949142000  |
| H | -1.814122000 | 4.449325000  | 0.759263000  |

|   |             |              |              |
|---|-------------|--------------|--------------|
| H | 5.062630000 | -2.677416000 | -0.490452000 |
|---|-------------|--------------|--------------|

### C8

E = -975.109746577 Ha

|   |              |              |              |
|---|--------------|--------------|--------------|
| C | 4.353659000  | -0.686687000 | 0.145938000  |
| N | 0.589285000  | -2.291510000 | -0.366990000 |
| C | -0.137840000 | -1.185371000 | -0.023763000 |
| C | 0.681670000  | -0.129804000 | 0.339041000  |
| C | 4.252818000  | -2.071491000 | -0.268530000 |
| C | 3.050949000  | -2.666309000 | -0.469353000 |
| C | 1.851740000  | -1.929062000 | -0.246822000 |
| N | 1.966433000  | -0.603561000 | 0.173685000  |
| C | 3.171168000  | 0.020982000  | 0.346367000  |
| H | -1.798829000 | 0.849939000  | -0.708174000 |
| H | 2.954430000  | -3.695528000 | -0.794254000 |
| C | 5.603405000  | -0.069865000 | 0.317660000  |
| H | 6.520649000  | -0.620006000 | 0.150645000  |
| H | 5.678727000  | 0.970156000  | 0.609705000  |
| C | -1.606230000 | -1.189960000 | -0.045814000 |
| C | -2.311019000 | -2.359987000 | 0.260680000  |
| C | -3.698405000 | -2.367047000 | 0.254920000  |
| C | -4.429540000 | -1.215090000 | -0.058137000 |
| C | -3.723267000 | -0.058388000 | -0.387715000 |
| C | -2.330723000 | -0.044862000 | -0.390342000 |
| H | -1.749111000 | -3.257820000 | 0.498324000  |
| H | -4.231262000 | -3.283580000 | 0.497734000  |
| H | -6.326343000 | -2.081388000 | -0.617638000 |
| H | -4.269622000 | 0.839235000  | -0.668437000 |
| C | -5.936674000 | -1.236170000 | -0.041837000 |
| H | -6.318085000 | -1.335157000 | 0.980367000  |
| H | -6.351204000 | -0.317896000 | -0.465811000 |
| C | 0.364572000  | 1.183535000  | 0.971330000  |
| H | -0.638153000 | 1.115932000  | 1.396038000  |
| H | 1.054687000  | 1.368254000  | 1.807736000  |
| C | 0.526525000  | 2.355163000  | 0.002809000  |
| H | 0.476091000  | 4.203195000  | -1.631892000 |
| H | -0.075801000 | 5.335450000  | -0.373998000 |
| N | -0.468345000 | 3.288662000  | -0.029431000 |
| H | -2.244826000 | 2.487636000  | 0.825703000  |
| O | 1.522789000  | 2.421395000  | -0.702888000 |
| C | -0.324802000 | 4.423117000  | -0.928817000 |
| H | -1.260142000 | 4.584110000  | -1.472848000 |
| C | -1.559307000 | 3.334515000  | 0.936191000  |
| H | -1.191954000 | 3.360469000  | 1.967394000  |
| H | -2.125397000 | 4.250718000  | 0.761183000  |
| H | 5.173663000  | -2.622681000 | -0.432936000 |
| H | 3.136363000  | 1.079345000  | 0.570577000  |

### C9

E = -975.077874836 Ha

|   |              |              |              |
|---|--------------|--------------|--------------|
| C | 4.316066000  | -0.792597000 | 0.128821000  |
| N | 0.515858000  | -2.332104000 | -0.385248000 |
| C | -0.175713000 | -1.207605000 | -0.034348000 |
| C | 0.671881000  | -0.175459000 | 0.329522000  |
| C | 4.142738000  | -2.135098000 | -0.280231000 |
| C | 2.972733000  | -2.766830000 | -0.499522000 |
| C | 1.789417000  | -2.005364000 | -0.268624000 |
| N | 1.943640000  | -0.682290000 | 0.158585000  |
| C | 3.167462000  | -0.081167000 | 0.330726000  |
| H | -1.781536000 | 0.869096000  | -0.725186000 |
| H | 2.878188000  | -3.794431000 | -0.832086000 |
| C | 5.676669000  | -0.172997000 | 0.297261000  |
| H | 6.245725000  | -0.224738000 | -0.635607000 |
| H | 5.592240000  | 0.876571000  | 0.588820000  |
| H | 6.252716000  | -0.699121000 | 1.064556000  |
| C | -1.644692000 | -1.170521000 | -0.049650000 |
| C | -2.380657000 | -2.317909000 | 0.267878000  |
| C | -3.767779000 | -2.285971000 | 0.267600000  |
| C | -4.467337000 | -1.116057000 | -0.050988000 |
| C | -3.730185000 | 0.017951000  | -0.391403000 |
| C | -2.337707000 | -0.007957000 | -0.399475000 |
| H | -1.843069000 | -3.229563000 | 0.509202000  |
| H | -4.325314000 | -3.185408000 | 0.518791000  |
| H | -6.389762000 | -1.931872000 | -0.598677000 |
| H | -4.252213000 | 0.928652000  | -0.676323000 |
| C | -5.974432000 | -1.094668000 | -0.029148000 |
| H | -6.354648000 | -1.177127000 | 0.994958000  |
| H | -6.364598000 | -0.167526000 | -0.456936000 |
| C | 0.388219000  | 1.142821000  | 0.968364000  |

|   |              |             |              |
|---|--------------|-------------|--------------|
| H | -0.617769000 | 1.100054000 | 1.388408000  |
| H | 1.078365000  | 1.304540000 | 1.809624000  |
| C | 0.586308000  | 2.316055000 | 0.008995000  |
| H | 0.597889000  | 4.175785000 | -1.613836000 |
| H | 0.067875000  | 5.311135000 | -0.349387000 |
| N | -0.385745000 | 3.272990000 | -0.028195000 |
| H | -2.178022000 | 2.503205000 | 0.821707000  |
| O | 1.591438000  | 2.363843000 | -0.686290000 |
| C | -0.202255000 | 4.411546000 | -0.915111000 |
| H | -1.128087000 | 4.604290000 | -1.464945000 |
| C | -1.482807000 | 3.342196000 | 0.929242000  |
| H | -1.122768000 | 3.373820000 | 1.963044000  |
| H | -2.036235000 | 4.263396000 | 0.740555000  |
| H | 3.145697000  | 0.976104000 | 0.568185000  |

**C10**

E = -975.074271924 Ha

|   |              |              |              |
|---|--------------|--------------|--------------|
| C | 4.305587000  | -0.780743000 | 0.121813000  |
| N | 0.512613000  | -2.334416000 | -0.396600000 |
| C | -0.182834000 | -1.217626000 | -0.041752000 |
| C | 0.660105000  | -0.178895000 | 0.326969000  |
| C | 4.213783000  | -2.154409000 | -0.301412000 |
| C | 2.991561000  | -2.689277000 | -0.487995000 |
| C | 1.785770000  | -1.998869000 | -0.279066000 |
| N | 1.931405000  | -0.672857000 | 0.153499000  |
| C | 3.159348000  | -0.074451000 | 0.327628000  |
| H | -1.801228000 | 0.853899000  | -0.720808000 |
| C | 5.654861000  | -0.139046000 | 0.299211000  |
| H | 6.228293000  | -0.171753000 | -0.632768000 |
| H | 5.558254000  | 0.906926000  | 0.599920000  |
| H | 6.239297000  | -0.661426000 | 1.063854000  |
| C | -1.652259000 | -1.188687000 | -0.055848000 |
| C | -2.381180000 | -2.341918000 | 0.256509000  |
| C | -3.768453000 | -2.318094000 | 0.256239000  |
| C | -4.474841000 | -1.150813000 | -0.056812000 |
| C | -3.744459000 | -0.010786000 | -0.391659000 |
| C | -2.351846000 | -0.028386000 | -0.399727000 |
| H | -1.838242000 | -3.251563000 | 0.493385000  |
| H | -4.320619000 | -3.222002000 | 0.503106000  |
| H | -6.392274000 | -1.975289000 | -0.608631000 |
| H | -4.271829000 | 0.898207000  | -0.672093000 |
| C | -5.982022000 | -1.138447000 | -0.034921000 |
| H | -6.361696000 | -1.228312000 | 0.988756000  |
| H | -6.377691000 | -0.211533000 | -0.458109000 |
| C | 0.365929000  | 1.135747000  | 0.969045000  |
| H | -0.637952000 | 1.083086000  | 1.392977000  |
| H | 1.058670000  | 1.302010000  | 1.807032000  |
| C | 0.550306000  | 2.311265000  | 0.009423000  |
| H | 0.540266000  | 4.175167000  | -1.608249000 |
| H | 0.009229000  | 5.303994000  | -0.338350000 |
| N | -0.428210000 | 3.262025000  | -0.019232000 |
| H | -2.210820000 | 2.477991000  | 0.837716000  |
| O | 1.550218000  | 2.365853000  | -0.692241000 |
| C | -0.257663000 | 4.403794000  | -0.904620000 |
| H | -1.187816000 | 4.591209000  | -1.448977000 |
| C | -1.520372000 | 3.321077000  | 0.944411000  |
| H | -1.154959000 | 3.351592000  | 1.976363000  |
| H | -2.080751000 | 4.239299000  | 0.761842000  |
| H | 5.124604000  | -2.721035000 | -0.476667000 |
| H | 3.136948000  | 0.980842000  | 0.569349000  |

**C14**

E = -975.082836686 Ha

|   |              |              |              |
|---|--------------|--------------|--------------|
| C | -4.266398000 | -0.775728000 | -0.163798000 |
| N | -0.462822000 | -2.208988000 | 0.425383000  |
| C | 0.218984000  | -1.116914000 | -0.020512000 |
| C | -0.638810000 | -0.110093000 | -0.439701000 |
| C | -4.132645000 | -2.103606000 | 0.353950000  |
| C | -2.906212000 | -2.650857000 | 0.589914000  |
| C | -1.741406000 | -1.897158000 | 0.298587000  |
| N | -1.903252000 | -0.613225000 | -0.220283000 |
| C | -3.142795000 | -0.054092000 | -0.430528000 |
| H | -2.775908000 | -3.648645000 | 0.991710000  |
| C | -5.632108000 | -0.182520000 | -0.381490000 |
| H | -6.203641000 | -0.163383000 | 0.552184000  |
| H | -5.563846000 | 0.841632000  | -0.755810000 |
| H | -6.205277000 | -0.772032000 | -1.104916000 |
| C | 1.686141000  | -1.107744000 | -0.032779000 |
| C | 2.414868000  | -2.280257000 | 0.231954000  |

|   |              |              |              |
|---|--------------|--------------|--------------|
| C | 3.804273000  | -2.271431000 | 0.230220000  |
| C | 4.536005000  | -1.107938000 | -0.034272000 |
| C | 3.824914000  | 0.073496000  | -0.290349000 |
| C | 2.452844000  | 0.015352000  | -0.276193000 |
| H | 1.858468000  | -3.187644000 | 0.445887000  |
| H | 4.340556000  | -3.193091000 | 0.441488000  |
| H | 6.443870000  | -1.810006000 | 0.689749000  |
| H | 4.355844000  | 1.002390000  | -0.488109000 |
| C | 6.042851000  | -1.127164000 | -0.064517000 |
| H | 6.410533000  | -1.462756000 | -1.040738000 |
| H | 6.456803000  | -0.132391000 | 0.121009000  |
| C | -0.384424000 | 1.207554000  | -1.098145000 |
| H | 0.610916000  | 1.175945000  | -1.537971000 |
| H | -1.100287000 | 1.351202000  | -1.917930000 |
| C | -0.620843000 | 2.369891000  | -0.129744000 |
| H | -0.853797000 | 4.128488000  | 1.570482000  |
| H | 0.291339000  | 5.234101000  | 0.762154000  |
| N | 0.399370000  | 3.215541000  | 0.187945000  |
| H | 2.452088000  | 2.792703000  | 0.426415000  |
| O | -1.743214000 | 2.500751000  | 0.343731000  |
| C | 0.161397000  | 4.235994000  | 1.195911000  |
| H | 0.875483000  | 4.117822000  | 2.018887000  |
| C | 1.756595000  | 3.191075000  | -0.322734000 |
| H | 1.842516000  | 2.593293000  | -1.227080000 |
| H | 2.057769000  | 4.216126000  | -0.565599000 |
| H | -5.033481000 | -2.670434000 | 0.571990000  |
| H | -3.146689000 | 0.980212000  | -0.749616000 |

**C15**

E = -975.079122347 Ha

|   |              |              |              |
|---|--------------|--------------|--------------|
| C | 4.268827000  | -0.691557000 | 0.144332000  |
| N | 0.519073000  | -2.294021000 | -0.380297000 |
| C | -0.199401000 | -1.189779000 | -0.031106000 |
| C | 0.622477000  | -0.135923000 | 0.339078000  |
| C | 4.185062000  | -2.058565000 | -0.273789000 |
| C | 2.980950000  | -2.664875000 | -0.480542000 |
| C | 1.786767000  | -1.934460000 | -0.255981000 |
| N | 1.902444000  | -0.612557000 | 0.172727000  |
| C | 3.117424000  | 0.005922000  | 0.348179000  |
| H | -1.847795000 | 0.872679000  | -0.728759000 |
| H | 2.891423000  | -3.692583000 | -0.812008000 |
| C | 5.611258000  | -0.035791000 | 0.323050000  |
| H | 6.187047000  | -0.063453000 | -0.607736000 |
| H | 5.505281000  | 1.009605000  | 0.622683000  |
| H | 6.200554000  | -0.551241000 | 1.088801000  |
| C | -1.668535000 | -1.182557000 | -0.053949000 |
| C | -2.389569000 | -2.341736000 | 0.249175000  |
| C | -3.780892000 | -2.341462000 | 0.242818000  |
| C | -4.514233000 | -1.185005000 | -0.063424000 |
| C | -3.750993000 | -0.077675000 | -0.375515000 |
| C | -2.379676000 | -0.019254000 | -0.402630000 |
| H | -1.837362000 | -3.245651000 | 0.485040000  |
| H | -4.319242000 | -3.256342000 | 0.481423000  |
| H | -6.426938000 | -2.174741000 | -0.070475000 |
| C | -6.021170000 | -1.160199000 | -0.046140000 |
| H | -6.394523000 | -0.670052000 | 0.859286000  |
| H | -6.415420000 | -0.609587000 | -0.904224000 |
| C | 0.305213000  | 1.177670000  | 0.971544000  |
| H | -0.700438000 | 1.112146000  | 1.389941000  |
| H | 0.990550000  | 1.361308000  | 1.812058000  |
| C | 0.471055000  | 2.347205000  | 0.000594000  |
| H | 0.404561000  | 4.170469000  | -1.659143000 |
| H | -0.170285000 | 5.327078000  | -0.433503000 |
| N | -0.519275000 | 3.284782000  | -0.028978000 |
| H | -2.355016000 | 2.544446000  | 0.761344000  |
| O | 1.463788000  | 2.405358000  | -0.711015000 |
| C | -0.400266000 | 4.394411000  | -0.961783000 |
| H | -1.339172000 | 4.520474000  | -1.509313000 |
| C | -1.614278000 | 3.333836000  | 0.932058000  |
| H | -1.251970000 | 3.263245000  | 1.961878000  |
| H | -2.115014000 | 4.297290000  | 0.823034000  |
| H | 5.107247000  | -2.607574000 | -0.442488000 |
| H | 3.080398000  | 1.060964000  | 0.590304000  |

**C17**

E = -975.111192774 Ha

|   |              |              |              |
|---|--------------|--------------|--------------|
| C | 4.254709000  | -0.662304000 | 0.134969000  |
| N | 0.519331000  | -2.305723000 | -0.361261000 |
| C | -0.211222000 | -1.203362000 | -0.025726000 |

|   |              |              |              |
|---|--------------|--------------|--------------|
| C | 0.604215000  | -0.137289000 | 0.330480000  |
| C | 4.182680000  | -2.034866000 | -0.266888000 |
| C | 2.983840000  | -2.654695000 | -0.463992000 |
| C | 1.783137000  | -1.932880000 | -0.245497000 |
| N | 1.887630000  | -0.604314000 | 0.166490000  |
| C | 3.097274000  | 0.027086000  | 0.332548000  |
| H | -1.883232000 | 0.839942000  | -0.668434000 |
| H | 2.903198000  | -3.687150000 | -0.782705000 |
| C | 5.591379000  | 0.007720000  | 0.303486000  |
| H | 6.166069000  | -0.026152000 | -0.627783000 |
| H | 5.476395000  | 1.055705000  | 0.590494000  |
| H | 6.186486000  | -0.492927000 | 1.074554000  |
| C | -1.675171000 | -1.216172000 | -0.046919000 |
| C | -2.374223000 | -2.403690000 | 0.232290000  |
| C | -3.752532000 | -2.426790000 | 0.236108000  |
| C | -4.514460000 | -1.259891000 | -0.050450000 |
| C | -3.793454000 | -0.076352000 | -0.363906000 |
| C | -2.412464000 | -0.062116000 | -0.367566000 |
| H | -1.800530000 | -3.299874000 | 0.446338000  |
| H | -4.279815000 | -3.349878000 | 0.461973000  |
| H | -6.462373000 | -2.188838000 | 0.191378000  |
| H | -4.347975000 | 0.820933000  | -0.627557000 |
| C | -5.918814000 | -1.280777000 | -0.040064000 |
| H | -6.493407000 | -0.390984000 | -0.268131000 |
| C | 0.281763000  | 1.175091000  | 0.962560000  |
| H | -0.717591000 | 1.103186000  | 1.394404000  |
| H | 0.975125000  | 1.384927000  | 1.795269000  |
| C | 0.431228000  | 2.347300000  | -0.007339000 |
| H | 0.354631000  | 4.194428000  | -1.642623000 |
| H | -0.179418000 | 5.327276000  | -0.377584000 |
| N | -0.564583000 | 1.384927000  | -0.025387000 |
| H | -2.335259000 | 2.483169000  | 0.846685000  |
| O | 1.418389000  | 2.415022000  | -0.725491000 |
| C | -0.435810000 | 4.414157000  | -0.927741000 |
| H | -1.379377000 | 4.573760000  | -1.457805000 |
| C | -1.642393000 | 3.324498000  | 0.955020000  |
| H | -1.260951000 | 3.338596000  | 1.981232000  |
| H | -2.204527000 | 4.246078000  | 0.796218000  |
| H | 5.109568000  | -2.577329000 | -0.430940000 |
| H | 3.051137000  | 1.084657000  | 0.561833000  |

### C18

E = -975.079088903 Ha

|   |              |              |              |
|---|--------------|--------------|--------------|
| C | 4.277882000  | -0.642591000 | 0.136084000  |
| N | 0.554318000  | -2.310566000 | -0.368118000 |
| C | -0.181989000 | -1.217046000 | -0.022954000 |
| C | 0.622963000  | -0.147320000 | 0.338978000  |
| C | 4.215997000  | -2.012788000 | -0.275333000 |
| C | 3.021656000  | -2.640207000 | -0.475616000 |
| C | 1.816127000  | -1.928791000 | -0.250946000 |
| N | 1.910529000  | -0.602883000 | 0.170333000  |
| C | 3.115549000  | 0.036594000  | 0.339716000  |
| H | -1.878652000 | 0.792146000  | -0.702168000 |
| H | 2.948302000  | -3.670969000 | -0.801502000 |
| C | 5.609609000  | 0.036359000  | 0.308232000  |
| H | 6.183494000  | 0.013743000  | -0.623866000 |
| H | 5.486935000  | 1.081281000  | 0.603093000  |
| H | 6.209296000  | -0.465457000 | 1.074953000  |
| C | -1.651032000 | -1.241484000 | -0.037986000 |
| C | -2.335495000 | -2.428703000 | 0.278466000  |
| C | -3.704942000 | -2.390487000 | 0.264971000  |
| C | -4.495616000 | -1.296320000 | -0.036796000 |
| C | -3.791479000 | -0.133399000 | -0.372458000 |
| C | -2.397487000 | -0.108167000 | -0.379763000 |
| H | -1.769285000 | -3.323764000 | 0.517943000  |
| H | -6.371596000 | -2.169979000 | -0.642459000 |
| H | -4.347256000 | 0.759042000  | -0.654132000 |
| C | -6.001484000 | -1.351686000 | -0.018211000 |

|   |              |              |              |
|---|--------------|--------------|--------------|
| H | -6.375167000 | -1.519941000 | 0.996742000  |
| H | -6.430163000 | -0.416741000 | -0.387993000 |
| C | 0.286737000  | 1.162695000  | 0.968734000  |
| H | -0.714458000 | 1.082041000  | 1.394596000  |
| H | 0.974093000  | 1.359943000  | 1.804539000  |
| C | 0.431660000  | 2.324477000  | -0.002200000 |
| H | 0.356092000  | 4.180160000  | -1.639628000 |
| H | -0.203240000 | 5.304350000  | -0.377908000 |
| N | -0.577339000 | 3.253009000  | -0.037855000 |
| H | -2.331230000 | 2.422811000  | 0.834725000  |
| O | 1.427545000  | 2.414631000  | -0.706992000 |
| C | -0.445329000 | 4.391127000  | -0.934438000 |
| H | -1.383127000 | 4.545221000  | -1.476153000 |
| C | -1.666793000 | 3.287901000  | 0.929965000  |
| H | -1.298412000 | 3.339774000  | 1.960014000  |
| H | -2.256160000 | 4.186472000  | 0.740946000  |
| H | 5.146805000  | -2.547049000 | -0.443976000 |
| H | 3.061615000  | 1.091978000  | 0.576995000  |

### C19

E = -975.076517092 Ha

|   |              |              |              |
|---|--------------|--------------|--------------|
| C | 4.292778000  | -0.683428000 | 0.138164000  |
| N | 0.554051000  | -2.316230000 | -0.373973000 |
| C | -0.170248000 | -1.219024000 | -0.018544000 |
| C | 0.642775000  | -0.157173000 | 0.347452000  |
| C | 4.218169000  | -2.050242000 | -0.282721000 |
| C | 3.018077000  | -2.665460000 | -0.485800000 |
| C | 1.818836000  | -1.945084000 | -0.255201000 |
| N | 1.925967000  | -0.622458000 | 0.175217000  |
| C | 3.136964000  | 0.004835000  | 0.347814000  |
| H | -1.850418000 | 0.805616000  | -0.747792000 |
| H | 2.934784000  | -3.693475000 | -0.817909000 |
| C | 5.630775000  | -0.017885000 | 0.314062000  |
| H | 6.203369000  | -0.038040000 | -0.618915000 |
| H | 5.517882000  | 1.025690000  | 0.617568000  |
| H | 6.226926000  | -0.531267000 | 1.075893000  |
| C | -1.638899000 | -1.217462000 | -0.037313000 |
| C | -2.388841000 | -2.333385000 | 0.291116000  |
| C | -3.757776000 | -2.400826000 | 0.305789000  |
| C | -4.485269000 | -1.249288000 | -0.043487000 |
| C | -3.773044000 | -0.103569000 | -0.402622000 |
| C | -2.378869000 | -0.084935000 | -0.410104000 |
| H | -4.278952000 | -3.315507000 | 0.579186000  |
| H | -6.379045000 | -2.080003000 | -0.660226000 |
| H | -4.319306000 | 0.786739000  | -0.704219000 |
| C | -5.992477000 | -1.269814000 | -0.033910000 |
| H | -6.377045000 | -1.428589000 | 0.979158000  |
| H | -6.403620000 | -0.328229000 | -0.406573000 |
| C | 0.313098000  | 1.154360000  | 0.977272000  |
| H | -0.691944000 | 1.080196000  | 1.395641000  |
| H | 0.995673000  | 1.346067000  | 1.818246000  |
| C | 0.471589000  | 2.325718000  | 0.007913000  |
| H | 0.412646000  | 4.167260000  | -1.634811000 |
| H | -0.150377000 | 5.298183000  | -0.380828000 |
| N | -0.532674000 | 3.249374000  | -0.034860000 |
| H | -2.307818000 | 2.436715000  | 0.812166000  |
| O | 1.472310000  | 2.401002000  | -0.690416000 |
| C | -0.392158000 | 4.383496000  | -0.935065000 |
| H | -1.326338000 | 4.538462000  | -1.482837000 |
| C | -1.629384000 | 3.289093000  | 0.924441000  |
| H | -1.268314000 | 3.320190000  | 1.957724000  |
| H | -2.201580000 | 4.200488000  | 0.744106000  |
| H | 5.144011000  | -2.591716000 | -0.455717000 |
| H | 3.093004000  | 1.058824000  | 0.593262000  |

**Table S9.** Coordinates and energies of the stationary points of the HAT from C4 site of zolpidem to between HO•. Level of theory: M06-2X/6-31G(d).

| RC                    |              |              | TS                    |              |              |
|-----------------------|--------------|--------------|-----------------------|--------------|--------------|
| E = -1051.46480906 Ha |              |              | E = -1051.45624520 Ha |              |              |
| C                     | 4.112939000  | -0.688318000 | C                     | 3.723656000  | -1.674233000 |
| N                     | 0.343335000  | -2.296966000 | N                     | -0.305648000 | -2.472016000 |
| C                     | -0.360405000 | -1.188928000 | C                     | -0.755982000 | -1.205818000 |
| C                     | 0.479271000  | -0.127353000 | C                     | 0.296407000  | -0.302936000 |
| C                     | 4.015277000  | -2.064040000 | C                     | 3.329283000  | -3.029303000 |
| C                     | 2.802110000  | -2.670203000 | C                     | 2.012175000  | -3.381345000 |
| C                     | 1.614900000  | -1.933334000 | C                     | 1.019462000  | -2.383319000 |
| N                     | 1.746116000  | -0.601236000 | N                     | 1.435302000  | -1.071203000 |
| C                     | 2.962199000  | 0.026166000  | C                     | 2.758341000  | -0.716190000 |
| H                     | -2.054419000 | 0.864006000  | H                     | -2.020131000 | 1.014417000  |
| H                     | 2.704543000  | -3.706475000 | H                     | 1.689117000  | -4.401828000 |
| C                     | 5.454792000  | -0.033908000 | C                     | 5.181225000  | -1.312141000 |
| H                     | 6.064023000  | -0.139896000 | H                     | 5.703341000  | -1.552401000 |
| H                     | 5.346716000  | 1.029693000  | H                     | 5.312000000  | -0.245011000 |
| H                     | 6.001987000  | -0.494002000 | H                     | 5.673098000  | -1.868403000 |
| C                     | -1.827825000 | -1.190014000 | C                     | -2.192954000 | -0.899776000 |
| C                     | -2.515694000 | -2.363213000 | C                     | -3.093808000 | -1.843408000 |
| C                     | -3.900868000 | -2.366846000 | C                     | -4.453081000 | -1.570813000 |
| C                     | -4.645788000 | -1.207596000 | C                     | -4.960319000 | -0.355838000 |
| C                     | -3.957394000 | -0.046575000 | C                     | -4.061785000 | 0.570416000  |
| C                     | -2.568086000 | -0.036296000 | C                     | -2.695995000 | 0.303668000  |
| H                     | -1.943013000 | -3.266625000 | H                     | -2.705293000 | -2.789938000 |
| H                     | -4.420660000 | -3.286399000 | H                     | -5.140137000 | -2.312481000 |
| H                     | -6.576088000 | -2.092637000 | H                     | -7.021376000 | -0.906440000 |
| H                     | -4.517165000 | 0.857532000  | H                     | -4.437181000 | 1.507201000  |
| C                     | -6.148579000 | -1.222329000 | C                     | -6.438383000 | -0.066995000 |
| H                     | -6.461396000 | -1.270032000 | H                     | -6.763814000 | 0.102832000  |
| H                     | -6.589637000 | -0.323448000 | H                     | -6.692846000 | 0.823165000  |
| C                     | 0.220894000  | 1.180336000  | C                     | 0.334347000  | 1.107884000  |
| H                     | -0.748205000 | 1.117329000  | H                     | -0.664543000 | 1.446742000  |
| H                     | 0.980567000  | 1.330990000  | H                     | 0.982905000  | 1.216437000  |
| C                     | 0.321040000  | 2.359259000  | C                     | 0.992179000  | 2.050893000  |
| H                     | -0.285416000 | 5.365501000  | H                     | 2.297270000  | 4.914578000  |
| H                     | -1.544525000 | 4.619699000  | H                     | 0.693267000  | 5.035782000  |
| N                     | -0.647186000 | 3.317261000  | N                     | 0.958649000  | 3.374850000  |
| H                     | -2.191124000 | 4.306971000  | H                     | 0.843256000  | 4.855016000  |
| O                     | 1.246105000  | 2.410637000  | O                     | 1.520336000  | 1.614577000  |
| C                     | -0.572117000 | 4.456442000  | C                     | 1.481776000  | 4.340138000  |
| H                     | 0.175914000  | 4.241949000  | H                     | 1.854649000  | 3.801502000  |
| C                     | -1.658012000 | 3.358483000  | C                     | 0.356113000  | 3.905337000  |
| H                     | -2.389510000 | 2.548600000  | H                     | -0.718592000 | 4.093796000  |
| H                     | -1.211253000 | 3.312595000  | H                     | 0.518961000  | 3.237656000  |
| H                     | 2.932688000  | 1.092418000  | H                     | 2.965273000  | 0.336194000  |
| O                     | 3.210967000  | -0.020958000 | O                     | 2.188497000  | 1.490796000  |
| H                     | 3.070216000  | -0.985930000 | H                     | 2.243762000  | 0.596088000  |
| H                     | 4.931405000  | -2.623093000 | H                     | 4.102280000  | -3.786642000 |

**Table S10.** Coordinates and energies of the stationary points of the HAT from C4 site of zolpidem to HOO<sup>•</sup> Level of theory: M06-2X/6-31G(d).

| TS                    |              |              | TS                    |   |              |              |              |
|-----------------------|--------------|--------------|-----------------------|---|--------------|--------------|--------------|
| E = -1126.58025454 Ha |              |              | E = -1126.58025454 Ha |   |              |              |              |
| C                     | 3.728152000  | -1.620687000 | -0.230740000          | C | -6.450385000 | -0.085237000 | -0.092629000 |
| N                     | -0.302151000 | -2.404888000 | -0.434559000          | H | -6.749898000 | 0.701563000  | -0.789737000 |
| C                     | -0.752587000 | -1.140103000 | -0.308504000          | H | -7.029319000 | -0.984236000 | -0.323810000 |
| C                     | 0.303805000  | -0.213385000 | -0.213626000          | C | 0.291274000  | 1.177289000  | 0.180844000  |
| C                     | 3.327644000  | -2.978090000 | -0.407222000          | H | -0.729417000 | 1.523178000  | 0.353535000  |
| C                     | 2.007460000  | -3.322551000 | -0.501063000          | H | 0.784804000  | 1.150396000  | 1.354222000  |
| C                     | 1.028427000  | -2.310298000 | -0.421357000          | C | 1.127236000  | 2.174843000  | -0.583040000 |
| N                     | 1.446193000  | -0.994014000 | -0.295819000          | H | 2.262730000  | 4.040903000  | -1.728307000 |
| C                     | 2.767950000  | -0.652673000 | -0.176369000          | H | 2.412768000  | 5.057634000  | -0.269300000 |
| H                     | -2.082293000 | 1.009583000  | -1.357713000          | N | 1.046114000  | 3.469572000  | -0.152299000 |
| H                     | 1.673345000  | -4.346070000 | -0.620235000          | H | -0.781166000 | 4.217835000  | 0.626987000  |
| C                     | 5.185498000  | -1.266507000 | -0.110096000          | O | 1.842537000  | 1.834023000  | -1.516410000 |
| H                     | 5.738043000  | -1.575280000 | -1.003367000          | C | 1.715745000  | 4.508416000  | -0.911880000 |
| H                     | 5.321324000  | -0.190002000 | 0.015797000           | H | 0.984541000  | 5.217214000  | -1.318817000 |
| H                     | 5.639856000  | -1.769122000 | 0.749839000           | C | 0.221241000  | 3.912739000  | 0.956426000  |
| C                     | -2.192823000 | -0.848555000 | -0.273789000          | H | 0.128616000  | 3.137415000  | 1.717939000  |
| C                     | -3.063847000 | -1.776558000 | 0.311356000           | H | 0.703529000  | 4.776673000  | 1.422410000  |
| C                     | -4.427684000 | -1.528450000 | 0.360745000           | H | 2.983920000  | 0.400849000  | -0.069720000 |
| C                     | -4.969837000 | -0.354518000 | -0.174545000          | O | 1.116608000  | 0.843794000  | 2.568228000  |
| C                     | -4.101636000 | 0.554643000  | -0.779678000          | O | 0.828509000  | -0.500546000 | 2.576118000  |
| C                     | -2.732196000 | 0.313390000  | -0.835143000          | H | -0.089617000 | -0.539193000 | 2.898143000  |
| H                     | -2.648855000 | -2.694434000 | 0.715990000           | H | -6.735334000 | 0.236585000  | 0.915306000  |
| H                     | -5.090172000 | -2.258461000 | 0.819847000           | H | 4.094718000  | -3.745649000 | -0.460796000 |
| H                     | -4.505074000 | 1.457513000  | -1.231106000          |   |              |              |              |

**Table S11.** Coordinates and energies of the stationary points of the HAT from c4 site of zolpidem to CH<sub>3</sub>O<sup>•</sup>. Level of theory: M06-2X/6-31G(d).

| RC                    |              |              | TS                    |   |              |              |              |
|-----------------------|--------------|--------------|-----------------------|---|--------------|--------------|--------------|
| E = -1090.76658061 Ha |              |              | E = -1090.75321899 Ha |   |              |              |              |
| C                     | 4.143322000  | -0.331524000 | -0.365738000          | H | -1.376474000 | 3.184195000  | 2.109717000  |
| N                     | 0.448673000  | -2.046093000 | -0.923757000          | H | -2.371167000 | 4.265387000  | 1.130767000  |
| C                     | -0.301025000 | -1.028510000 | -0.408260000          | H | 2.899072000  | 1.289474000  | 0.347699000  |
| C                     | 0.491692000  | 0.022112000  | 0.030176000           | C | 1.851623000  | -2.030835000 | 2.309053000  |
| C                     | 4.101317000  | -1.635531000 | -0.956555000          | H | 1.810306000  | -2.705348000 | 3.177037000  |
| C                     | 2.916170000  | -2.266694000 | -1.201489000          | H | 2.843169000  | -2.051481000 | 1.833173000  |
| C                     | 1.703776000  | -1.625989000 | -0.843998000          | H | 1.116817000  | -2.420645000 | 1.576974000  |
| N                     | 1.779004000  | -0.358582000 | -0.272213000          | O | 1.427541000  | -0.768376000 | 2.635917000  |
| C                     | 2.970795000  | 0.283030000  | -0.044886000          | H | 5.038906000  | -2.115684000 | -1.222836000 |
| H                     | -2.098236000 | 0.978779000  | -0.750889000          |   |              |              |              |
| H                     | 2.857725000  | -3.249834000 | -1.653439000          |   |              |              |              |
| C                     | 5.463398000  | 0.353080000  | -0.135435000          |   |              |              |              |
| H                     | 6.003239000  | 0.488971000  | -1.078246000          |   |              |              |              |
| H                     | 5.324942000  | 1.337080000  | 0.318607000           |   |              |              |              |
| H                     | 6.102943000  | -0.239945000 | 0.526713000           |   |              |              |              |
| C                     | -1.767181000 | -1.109060000 | -0.340621000          |   |              |              |              |
| C                     | -2.394800000 | -2.341684000 | -0.128078000          |   |              |              |              |
| C                     | -3.777859000 | -2.423819000 | -0.052618000          |   |              |              |              |
| C                     | -4.580873000 | -1.285751000 | -0.189221000          |   |              |              |              |
| C                     | -3.952482000 | -0.063341000 | -0.426755000          |   |              |              |              |
| C                     | -2.565428000 | 0.026182000  | -0.509029000          |   |              |              |              |
| H                     | -1.777761000 | -3.229538000 | -0.029820000          |   |              |              |              |
| H                     | -4.249945000 | -3.389179000 | 0.115033000           |   |              |              |              |
| H                     | -6.465247000 | -2.213744000 | -0.689627000          |   |              |              |              |
| H                     | -4.557531000 | 0.828956000  | -0.570464000          |   |              |              |              |
| C                     | -6.080988000 | -1.388243000 | -0.082645000          |   |              |              |              |
| H                     | -6.390182000 | -1.573009000 | 0.952071000           |   |              |              |              |
| H                     | -6.566432000 | -0.467406000 | -0.416238000          |   |              |              |              |
| C                     | 0.155022000  | 1.252605000  | 0.801982000           |   |              |              |              |
| H                     | -0.818268000 | 1.094903000  | 1.269218000           |   |              |              |              |
| H                     | 0.879375000  | 1.375733000  | 1.618412000           |   |              |              |              |
| C                     | 0.212536000  | 2.509867000  | -0.061757000          |   |              |              |              |
| H                     | -0.006064000 | 4.507204000  | -1.491706000          |   |              |              |              |
| H                     | -0.526002000 | 5.501493000  | -0.108921000          |   |              |              |              |
| N                     | -0.797646000 | 3.416725000  | 0.081178000           |   |              |              |              |
| H                     | -2.528769000 | 2.513352000  | 0.930060000           |   |              |              |              |
| O                     | 1.143268000  | 2.669974000  | -0.839044000          |   |              |              |              |
| C                     | -0.768143000 | 4.626809000  | -0.724064000          |   |              |              |              |
| H                     | -1.743638000 | 4.785223000  | -1.194103000          |   |              |              |              |
| C                     | -1.817117000 | 3.325283000  | 1.118165000           |   |              |              |              |



|   |              |             |              |   |             |              |              |
|---|--------------|-------------|--------------|---|-------------|--------------|--------------|
| H | 0.939515000  | 1.185980000 | 1.266352000  | H | 2.901731000 | 0.362894000  | -0.015957000 |
| C | 1.004200000  | 2.107170000 | -0.671994000 | C | 1.410113000 | -0.258042000 | 2.890086000  |
| H | 1.971981000  | 3.899005000 | -2.059143000 | H | 1.123997000 | -0.207278000 | 3.950527000  |
| H | 2.479202000  | 4.904772000 | -0.675289000 | H | 2.218359000 | -0.991931000 | 2.749231000  |
| N | 1.069147000  | 3.405855000 | -0.261254000 | H | 0.526105000 | -0.650961000 | 2.347116000  |
| H | -0.542593000 | 4.186970000 | 0.880973000  | O | 1.751886000 | 0.993040000  | 2.407762000  |
| O | 1.500395000  | 1.709144000 | -1.715869000 | H | 3.992661000 | -3.763926000 | -0.634560000 |
| C | 1.632880000  | 4.400554000 | -1.154650000 |   |             |              |              |
| H | 0.878797000  | 5.153330000 | -1.413065000 |   |             |              |              |
| C | 0.509623000  | 3.891769000 | 0.988776000  |   |             |              |              |
| H | 0.602039000  | 3.146516000 | 1.780316000  |   |             |              |              |
| H | 1.079224000  | 4.772010000 | 1.298330000  |   |             |              |              |

**Table S12.** Coordinates and energies of the stationary points of the HAT from C4 site of zolpidem to CH3OO<sup>•</sup>. Level of theory: M06-2X/6-31G(d).

| RC                    |               |              |              | TS                    |              |              |              |
|-----------------------|---------------|--------------|--------------|-----------------------|--------------|--------------|--------------|
| E = -1165.90399234 Ha |               |              |              | E = -1165.87278457 Ha |              |              |              |
| C                     | 4.572357000   | -0.705101000 | 0.290511000  | C                     | 3.818554000  | -1.482797000 | -0.402448000 |
| N                     | 0.917042000   | -2.406081000 | -0.507229000 | N                     | -0.194098000 | -2.347629000 | -0.622569000 |
| C                     | 0.154424000   | -1.288301000 | -0.333785000 | C                     | -0.673149000 | -1.091789000 | -0.501036000 |
| C                     | 0.923733000   | -0.193573000 | 0.035971000  | C                     | 0.362342000  | -0.139929000 | -0.400147000 |
| C                     | 4.545852000   | -2.103293000 | -0.018984000 | C                     | 3.444804000  | -2.850433000 | -0.567493000 |
| C                     | 3.377065000   | -2.744622000 | -0.305519000 | C                     | 2.132154000  | -3.217544000 | -0.673961000 |
| C                     | 2.160048000   | -2.017371000 | -0.275713000 | C                     | 1.132480000  | -2.223478000 | -0.609857000 |
| N                     | 2.217098000   | -0.663492000 | 0.050715000  | N                     | 1.522330000  | -0.894223000 | -0.483003000 |
| C                     | 3.400454000   | -0.012705000 | 0.307495000  | C                     | 2.842662000  | -0.529478000 | -0.366209000 |
| H                     | -1.510153000  | 0.704884000  | -1.190034000 | H                     | -2.043685000 | 0.992866000  | -1.613013000 |
| H                     | 3.332516000   | -3.797391000 | -0.558018000 | H                     | 1.816542000  | -4.247333000 | -0.790707000 |
| C                     | 5.881725000   | -0.014924000 | 0.561037000  | C                     | 5.269468000  | -1.100332000 | -0.287535000 |
| H                     | 6.557056000   | -0.107981000 | -0.295674000 | H                     | 5.823955000  | -1.401940000 | -1.181983000 |
| H                     | 5.735112000   | 1.049292000  | 0.760300000  | H                     | 5.385430000  | -0.020970000 | -0.166697000 |
| H                     | 6.386615000   | -0.456880000 | 1.426539000  | H                     | 5.737502000  | -1.591927000 | 0.571539000  |
| C                     | -1.304391000  | -1.331384000 | -0.512527000 | C                     | -2.118791000 | -0.831900000 | -0.471962000 |
| C                     | -1.997972000  | -2.522220000 | -0.263728000 | C                     | -2.968375000 | -1.758082000 | 0.144461000  |
| C                     | -3.379802000  | -2.575643000 | -0.393398000 | C                     | -4.337418000 | -1.539988000 | 0.181945000  |
| C                     | -4.117033000  | -1.449027000 | -0.777999000 | C                     | -4.904347000 | -0.399067000 | -0.397125000 |
| C                     | -3.419448000  | -0.268623000 | -1.042783000 | C                     | -4.055899000 | 0.508627000  | -1.031399000 |
| C                     | -2.033425000  | -0.210760000 | -0.925602000 | C                     | -2.681146000 | 0.297467000  | -1.073886000 |
| H                     | -1.430402000  | -3.398657000 | 0.033147000  | H                     | -2.534448000 | -2.649257000 | 0.587058000  |
| H                     | -3.901965000  | -3.508328000 | -0.192591000 | H                     | -4.984224000 | -2.266266000 | 0.668352000  |
| H                     | -6.060636000  | -2.212518000 | -0.223710000 | H                     | -6.685639000 | 0.180448000  | 0.671556000  |
| H                     | -3.967152000  | 0.614879000  | -1.362525000 | H                     | -4.478428000 | 1.386674000  | -1.513241000 |
| C                     | -5.613411000  | -1.523383000 | -0.945714000 | C                     | -6.390820000 | -0.160999000 | -0.326957000 |
| H                     | -6.077620000  | -0.542142000 | -0.814966000 | H                     | -6.705285000 | 0.600578000  | -1.045218000 |
| H                     | -5.876470000  | -1.882349000 | -1.947030000 | H                     | -6.948955000 | -1.078435000 | -0.536169000 |
| C                     | 0.540829000   | 1.172814000  | 0.495811000  | C                     | 0.286387000  | 1.228986000  | 0.057466000  |
| H                     | -0.5111767000 | 1.151397000  | 0.773871000  | H                     | -0.756648000 | 1.527828000  | 0.176497000  |
| H                     | 1.098827000   | 1.436360000  | 1.406755000  | H                     | 0.605353000  | 1.149030000  | 1.304706000  |
| C                     | 0.841764000   | 2.244921000  | -0.553488000 | C                     | 1.137729000  | 2.301370000  | -0.565575000 |
| H                     | 0.987287000   | 3.906016000  | -2.366809000 | H                     | 2.280121000  | 4.280815000  | -1.495427000 |
| H                     | 0.298819000   | 5.199602000  | -1.352019000 | H                     | 2.241397000  | 5.218233000  | -0.023201000 |
| N                     | -0.088470000  | 3.224470000  | -0.730679000 | N                     | 0.958036000  | 3.561516000  | -0.070833000 |
| H                     | -1.083222000  | 3.154883000  | 1.143260000  | H                     | -0.129451000 | 3.078855000  | 1.674472000  |
| O                     | 1.883387000   | 2.192327000  | -1.193508000 | O                     | 1.947570000  | 2.051818000  | -1.452815000 |
| C                     | 0.121001000   | 4.206583000  | -1.780696000 | C                     | 1.636995000  | 4.672648000  | -0.709888000 |
| H                     | -0.762857000  | 4.256551000  | -2.425452000 | H                     | 0.907931000  | 5.366865000  | -1.145007000 |
| C                     | -1.276541000  | 3.392424000  | 0.096082000  | C                     | 0.010952000  | 3.904680000  | 0.976178000  |
| H                     | -1.578146000  | 4.441306000  | 0.043319000  | H                     | 0.413341000  | 4.751113000  | 1.540069000  |
| H                     | -2.116047000  | 2.775529000  | -0.249850000 | H                     | -0.962306000 | 4.201701000  | 0.563107000  |
| H                     | 3.329268000   | 1.057385000  | 0.457316000  | H                     | 3.038901000  | 0.530932000  | -0.293976000 |
| C                     | -2.492382000  | -0.345901000 | 2.445409000  | C                     | 0.596158000  | -1.400617000 | 2.662919000  |
| H                     | -2.836148000  | -0.457666000 | 3.474874000  | H                     | 0.934587000  | -1.488034000 | 3.700112000  |
| H                     | -1.495131000  | -0.771715000 | 2.315407000  | H                     | 1.463879000  | -1.336147000 | 1.998769000  |
| H                     | -3.192723000  | -0.777281000 | 1.729930000  | H                     | -0.027757000 | -2.253715000 | 2.385820000  |
| O                     | -2.433997000  | 1.060166000  | 2.135556000  | O                     | -0.229674000 | -0.256468000 | 2.511996000  |
| O                     | -1.629280000  | 1.681222000  | 2.951579000  | O                     | 0.548806000  | 0.868491000  | 2.557549000  |
| H                     | 5.485292000   | -2.648632000 | -0.038986000 | H                     | 4.225980000  | -3.604364000 | -0.607771000 |

**Table S13.** Coordinates and energies of the zolpidem metabolites, their radical form at the C4 site and at the OH/COOH sites, and of the transition states for the HAT from the C4 site and from the OH/COOH site to the studied radicals. Level of theory: M06-2X/6-31G(d) .

|                        |              |              |                       |                                  |              |              |              |
|------------------------|--------------|--------------|-----------------------|----------------------------------|--------------|--------------|--------------|
| <b>MI</b>              |              |              |                       |                                  |              |              |              |
| E = -1124.97812108 Ha  |              |              |                       |                                  |              |              |              |
| C                      | 4.747559000  | -0.962823000 | 0.124848000           | C                                | -5.766691000 | -0.231178000 | -0.032837000 |
| N                      | 0.886744000  | -2.279550000 | -0.380509000          | C                                | 0.849638000  | 1.235535000  | 0.078132000  |
| C                      | 0.254854000  | -1.124993000 | -0.026905000          | H                                | -0.159544000 | 1.557779000  | 0.302124000  |
| C                      | 1.154987000  | -0.135364000 | 0.339941000           | C                                | 1.849551000  | 2.273321000  | -0.173106000 |
| C                      | 4.559368000  | -2.318962000 | -0.296629000          | H                                | 3.131896000  | 4.296067000  | -0.779201000 |
| C                      | 3.312831000  | -2.833020000 | -0.498541000          | H                                | 2.886576000  | 5.090953000  | 0.797170000  |
| C                      | 2.177977000  | -2.015467000 | -0.264759000          | N                                | 1.569004000  | 3.519096000  | 0.334050000  |
| N                      | 2.394002000  | -0.706889000 | 0.165857000           | H                                | -0.460066000 | 4.058486000  | 0.676909000  |
| C                      | 3.653419000  | -0.181442000 | 0.336749000           | O                                | 2.867490000  | 2.075832000  | -0.845776000 |
| H                      | -1.240289000 | 1.046192000  | -0.664621000          | C                                | 2.384507000  | 4.646796000  | -0.070521000 |
| H                      | 3.144591000  | -3.849984000 | -0.832352000          | H                                | 1.762422000  | 5.416759000  | -0.542770000 |
| C                      | 6.136476000  | -0.410676000 | 0.297543000           | C                                | 0.460441000  | 3.807393000  | 1.221525000  |
| H                      | 6.703603000  | -0.480957000 | -0.636267000          | H                                | 0.263391000  | 2.962521000  | 1.883483000  |
| H                      | 6.111405000  | 0.639336000  | 0.598489000           | H                                | 0.729489000  | 4.664329000  | 1.845544000  |
| H                      | 6.688604000  | -0.970374000 | 1.059849000           | H                                | 4.737583000  | -3.762037000 | 0.055650000  |
| C                      | -1.209715000 | -1.017284000 | -0.041849000          | H                                | 3.696619000  | 0.424863000  | -0.128789000 |
| C                      | -1.993939000 | -2.141776000 | 0.245754000           | O                                | -6.539600000 | -0.947616000 | 0.557036000  |
| C                      | -3.376840000 | -2.047322000 | 0.250555000           | O                                | -6.178777000 | 0.840716000  | -0.741542000 |
| C                      | -3.998481000 | -0.829369000 | -0.038201000          | H                                | -7.147222000 | 0.862739000  | -0.655552000 |
| C                      | -3.227502000 | 0.290808000  | -0.353511000          | <b>MI TS(C4) HO<sup>•</sup></b>  |              |              |              |
| C                      | -1.841812000 | 0.191951000  | -0.362104000          | E = -1200.67043700 Ha            |              |              |              |
| H                      | -1.494934000 | -3.080475000 | 0.462484000           | C                                | 4.244359000  | -1.690369000 | -0.043665000 |
| H                      | -3.999577000 | -2.906423000 | 0.478203000           | N                                | 0.213721000  | -2.463169000 | -0.306130000 |
| H                      | -3.716244000 | 1.224959000  | -0.609363000          | C                                | -0.229811000 | -1.196993000 | -0.105005000 |
| C                      | -5.482203000 | -0.781085000 | -0.013666000          | C                                | 0.824975000  | -0.301458000 | 0.075025000  |
| C                      | 0.944841000  | 1.197096000  | 0.977854000           | C                                | 3.844199000  | -3.040121000 | -0.291576000 |
| H                      | -0.058163000 | 1.210847000  | 1.407088000           | C                                | 2.526732000  | -3.383852000 | -0.404303000 |
| H                      | 1.649484000  | 1.323142000  | 1.812925000           | C                                | 1.538662000  | -2.381735000 | -0.266134000 |
| C                      | 1.196937000  | 2.353692000  | 0.009773000           | N                                | 1.959491000  | -1.075405000 | -0.038614000 |
| H                      | 1.281757000  | 4.203360000  | -1.621833000          | C                                | 3.844199000  | -0.728911000 | 0.072486000  |
| H                      | 0.844597000  | 5.378524000  | -0.357892000          | H                                | -1.470675000 | 1.052050000  | -1.012560000 |
| N                      | 0.289384000  | 3.372108000  | -0.002753000          | H                                | 2.199174000  | -4.399540000 | -0.590763000 |
| H                      | -1.554465000 | 2.746224000  | 0.858773000           | C                                | 5.703277000  | -1.338935000 | 0.066162000  |
| O                      | 2.183465000  | 2.331948000  | -0.711940000          | H                                | 6.230021000  | -1.567973000 | -0.865805000 |
| C                      | 0.512710000  | 4.489727000  | -0.907221000          | H                                | 5.839421000  | -0.275980000 | 0.278189000  |
| H                      | -0.414178000 | 4.727168000  | -1.437510000          | H                                | 6.185470000  | -1.911359000 | 0.865287000  |
| C                      | -0.778315000 | 3.509708000  | 0.980017000           | C                                | -1.666181000 | -0.888131000 | -0.091894000 |
| H                      | -0.397412000 | 3.466693000  | 2.005369000           | C                                | -2.568221000 | -1.847322000 | 0.385498000  |
| H                      | -1.242865000 | 4.486690000  | 0.838404000           | C                                | -3.928351000 | -1.577666000 | 0.420195000  |
| H                      | 5.437108000  | -2.934618000 | -0.471968000          | C                                | -4.404315000 | -0.342577000 | -0.029163000 |
| H                      | 3.697552000  | 0.872713000  | 0.581217000           | C                                | -3.515968000 | 0.608963000  | -0.530843000 |
| O                      | -6.201118000 | -1.717050000 | 0.243079000           | C                                | -2.155990000 | 0.335302000  | -0.569232000 |
| O                      | -5.975717000 | 0.440518000  | -0.310720000          | H                                | -2.179274000 | -2.801638000 | 0.724736000  |
| H                      | -6.943436000 | 0.353585000  | -0.270403000          | H                                | -4.627462000 | -2.316886000 | 0.795447000  |
| <b>MI radical (C4)</b> |              |              |                       |                                  |              |              |              |
| E = -1124.33945452 Ha  |              |              |                       |                                  |              |              |              |
| C                      | 4.406567000  | -1.617664000 | -0.012051000          | H                                | -3.913106000 | 1.548616000  | -0.900691000 |
| N                      | 0.366572000  | -2.365577000 | 0.013235000           | C                                | -5.849392000 | 0.001730000  | -0.008876000 |
| C                      | -0.085938000 | -1.105270000 | -0.028719000          | C                                | 0.869566000  | 1.105602000  | 0.488902000  |
| C                      | 0.978990000  | -0.147261000 | -0.050820000          | H                                | -0.125756000 | 1.450052000  | 0.781898000  |
| C                      | 3.984992000  | -2.979103000 | 0.026408000           | H                                | 1.519768000  | 1.202076000  | 1.438260000  |
| C                      | 2.656256000  | -3.303690000 | 0.025539000           | C                                | 1.538676000  | 2.052050000  | -0.509359000 |
| C                      | 1.698628000  | -2.271945000 | -0.008568000          | H                                | 2.850678000  | 4.912482000  | -0.666011000 |
| N                      | 2.128073000  | -0.950573000 | -0.061546000          | H                                | 1.252790000  | 5.040677000  | -1.440744000 |
| C                      | 3.465927000  | -0.628987000 | -0.054468000          | N                                | 1.504726000  | 3.373628000  | -0.187658000 |
| H                      | -1.434720000 | 0.880080000  | -1.351528000          | H                                | 1.373812000  | 4.850623000  | 1.260402000  |
| H                      | 2.297174000  | -4.325149000 | 0.058613000           | O                                | 2.074565000  | 1.616197000  | -1.517028000 |
| C                      | 5.872299000  | -1.275860000 | -0.018167000          | C                                | 2.037659000  | 4.342323000  | -1.128530000 |
| H                      | 6.373008000  | -1.720496000 | -0.884297000          | H                                | 2.416196000  | 3.807107000  | -1.997293000 |
| H                      | 6.024907000  | -0.195116000 | -0.057330000          | C                                | 0.891666000  | 3.899751000  | 1.020482000  |
| H                      | 6.367339000  | -1.658779000 | 0.880292000           | H                                | -0.182631000 | 4.084755000  | 0.890116000  |
| C                      | -1.529146000 | -0.835439000 | -0.047656000          | H                                | 1.051545000  | 3.231084000  | 1.867206000  |
| C                      | -2.385139000 | -1.711745000 | 0.636636000           | H                                | 4.614113000  | -3.799615000 | -0.394660000 |
| C                      | -3.753854000 | -1.500194000 | 0.633389000           | H                                | 3.495718000  | 0.319460000  | 0.242329000  |
| C                      | -4.292842000 | -0.415710000 | -0.063914000          | O                                | 2.689757000  | 1.454305000  | 2.405663000  |
| C                      | -3.454202000 | 0.446328000  | -0.771390000          | H                                | 2.709615000  | 0.567928000  | 2.819705000  |
| C                      | -2.081185000 | 0.235059000  | -0.765328000          | O                                | -6.621179000 | -0.991605000 | 0.477941000  |
| H                      | -1.951311000 | -2.553751000 | 1.165301000           | H                                | -7.535607000 | -0.662355000 | 0.444313000  |
| H                      | -4.427983000 | -2.163071000 | 1.165925000           | O                                | -6.313704000 | 1.053245000  | -0.380774000 |
| H                      | -3.880771000 | 1.269427000  | -1.333970000          | <b>MI TS(C4) HOO<sup>•</sup></b> |              |              |              |
|                        |              |              | E = -1275.79397314 Ha |                                  |              |              |              |
|                        |              |              | C                     | 4.225713000                      | -1.604210000 | -0.274314000 |              |
|                        |              |              | N                     | 0.198501000                      | -2.404607000 | -0.457764000 |              |

|   |              |              |              |
|---|--------------|--------------|--------------|
| C | -0.255182000 | -1.144495000 | -0.302009000 |
| C | 0.796311000  | -0.214570000 | -0.197769000 |
| C | 3.830221000  | -2.959850000 | -0.477305000 |
| C | 2.511510000  | -3.309638000 | -0.566834000 |
| C | 1.528464000  | -2.303782000 | -0.456353000 |
| N | 1.940566000  | -0.988460000 | -0.306667000 |
| C | 3.261777000  | -0.642445000 | -0.190351000 |
| H | -1.587890000 | 1.024517000  | -1.289250000 |
| H | 2.181428000  | -4.332012000 | -0.705186000 |
| C | 5.682345000  | -1.246202000 | -0.158086000 |
| H | 6.227765000  | -1.531158000 | -1.063508000 |
| H | 5.814701000  | -0.172516000 | -0.007428000 |
| H | 6.146127000  | -1.767607000 | 0.685377000  |
| C | -1.697180000 | -0.863681000 | -0.255800000 |
| C | -2.556156000 | -1.816684000 | 0.309242000  |
| C | -3.919572000 | -1.578467000 | 0.375083000  |
| C | -4.447024000 | -0.387579000 | -0.130955000 |
| C | -3.604537000 | 0.556050000  | -0.720178000 |
| C | -2.237842000 | 0.315224000  | -0.785949000 |
| H | -2.130017000 | -2.739971000 | 0.687634000  |
| H | -4.598050000 | -2.301782000 | 0.815607000  |
| H | -4.024260000 | 1.464741000  | -1.137344000 |
| C | -5.914990000 | -0.179173000 | -0.031814000 |
| C | 0.788351000  | 1.171170000  | 0.214680000  |
| H | -0.226451000 | 1.515004000  | 0.421937000  |
| H | 1.325759000  | 1.130770000  | 1.371727000  |
| C | 1.606503000  | 2.176019000  | -0.560860000 |
| H | 2.709765000  | 4.051077000  | -1.722169000 |
| H | 2.909599000  | 5.048269000  | -0.255844000 |
| N | 1.537702000  | 3.466129000  | -0.117042000 |
| H | -0.269640000 | 4.200347000  | 0.720973000  |
| O | 2.296768000  | 1.839984000  | -1.514282000 |
| C | 2.190341000  | 4.511109000  | -0.883800000 |
| H | 1.450802000  | 5.228343000  | -1.259209000 |
| C | 0.743874000  | 3.899361000  | 1.018280000  |
| H | 0.679226000  | 3.120062000  | 1.778741000  |
| H | 1.235368000  | 4.763601000  | 1.473585000  |
| H | 4.600842000  | -3.721786000 | -0.554212000 |
| H | 3.473572000  | 0.409081000  | -0.058649000 |
| O | 1.743474000  | 0.818824000  | 2.549436000  |
| O | 1.449819000  | -0.523949000 | 2.580464000  |
| H | 0.568997000  | -0.558091000 | 2.993948000  |
| O | -6.690673000 | -0.960601000 | 0.464189000  |
| O | -6.316921000 | 0.996171000  | -0.558683000 |
| H | -7.282330000 | 1.025302000  | -0.444875000 |

#### MI TS(C4) CH<sub>3</sub>O'

E = -1239.96697394 Ha

|   |              |              |              |
|---|--------------|--------------|--------------|
| C | 4.166299000  | -1.612184000 | -0.323127000 |
| N | 0.137006000  | -2.421563000 | -0.479280000 |
| C | -0.314703000 | -1.163744000 | -0.268151000 |
| C | 0.737383000  | -0.247370000 | -0.133026000 |
| C | 3.771619000  | -2.963621000 | -0.564016000 |
| C | 2.454055000  | -3.318818000 | -0.645858000 |
| C | 1.464214000  | -2.323775000 | -0.487220000 |
| N | 1.877879000  | -1.013393000 | -0.283318000 |
| C | 3.200193000  | -0.658366000 | -0.189365000 |
| H | -1.614499000 | 1.059241000  | -1.150345000 |
| H | 2.129792000  | -4.338051000 | -0.817605000 |
| C | 5.623826000  | -1.251115000 | -0.229073000 |
| H | 6.142587000  | -1.478287000 | -1.165941000 |
| H | 5.754862000  | -0.187289000 | -0.019057000 |
| H | 6.116677000  | -1.818546000 | 0.566863000  |
| C | -1.753947000 | -0.873799000 | -0.208038000 |
| C | -2.625344000 | -1.841809000 | 0.308781000  |
| C | -3.985668000 | -1.588827000 | 0.382227000  |
| C | -4.495688000 | -0.367957000 | -0.067363000 |
| C | -3.639531000 | 0.592528000  | -0.607379000 |
| C | -2.276025000 | 0.336579000  | -0.681807000 |
| H | -2.212165000 | -2.786546000 | 0.646137000  |
| H | -4.675014000 | -2.323061000 | 0.786160000  |
| H | -4.046088000 | 1.526030000  | -0.980395000 |
| C | -5.961315000 | -0.145783000 | 0.036767000  |
| C | 0.782119000  | 1.147089000  | 0.290671000  |
| H | -0.207841000 | 1.500596000  | 0.589596000  |
| H | 1.441045000  | 1.172371000  | 1.285753000  |
| C | 1.490364000  | 2.117342000  | -0.644602000 |
| H | 2.436308000  | 3.933228000  | -2.015851000 |
| H | 2.933687000  | 4.929590000  | -0.621699000 |

|   |              |              |              |
|---|--------------|--------------|--------------|
| N | 1.539634000  | 3.412006000  | -0.222020000 |
| H | -0.080573000 | 4.167435000  | 0.925309000  |
| O | 1.990563000  | 1.732871000  | -1.691674000 |
| C | 2.092544000  | 4.421663000  | -1.105997000 |
| H | 1.330122000  | 5.168708000  | -1.355850000 |
| C | 0.973905000  | 3.880427000  | 1.032176000  |
| H | 1.071944000  | 3.128483000  | 1.816638000  |
| H | 1.535212000  | 4.762472000  | 1.351314000  |
| H | 4.544858000  | -3.717879000 | -0.679930000 |
| H | 3.406933000  | 0.387788000  | -0.006627000 |
| C | 1.933295000  | -0.275711000 | 2.893323000  |
| H | 1.671883000  | -0.235293000 | 3.960228000  |
| H | 2.749121000  | -0.995461000 | 2.728487000  |
| H | 1.041986000  | -0.674980000 | 2.368989000  |
| O | 2.246444000  | 0.986760000  | 2.416750000  |
| O | -6.749482000 | -0.941443000 | 0.488522000  |
| O | -6.345876000 | 1.060264000  | -0.430483000 |
| H | -7.311227000 | 1.095990000  | -0.318298000 |

#### MI TS(C4) CH<sub>3</sub>OO'

E = -1315.08653195 Ha

|   |              |              |              |
|---|--------------|--------------|--------------|
| C | 4.292575000  | -1.483799000 | -0.467266000 |
| N | 0.276250000  | -2.337979000 | -0.635630000 |
| C | -0.196691000 | -1.083016000 | -0.488815000 |
| C | 0.840166000  | -0.133475000 | -0.391703000 |
| C | 3.913299000  | -2.848303000 | -0.648835000 |
| C | 2.598923000  | -3.211354000 | -0.740759000 |
| C | 1.602854000  | -2.215830000 | -0.644182000 |
| N | 1.996749000  | -0.889359000 | -0.502786000 |
| C | 3.320194000  | -0.529044000 | -0.400400000 |
| H | -1.576939000 | 1.017171000  | -1.545482000 |
| H | 2.278916000  | -4.238302000 | -0.869608000 |
| C | 5.746046000  | -1.106860000 | -0.368976000 |
| H | 6.285286000  | -1.396310000 | -1.276605000 |
| H | 5.867129000  | -0.029885000 | -0.233277000 |
| H | 6.225559000  | -1.613332000 | 0.474908000  |
| C | -1.642643000 | -0.825790000 | -0.431057000 |
| C | -2.475161000 | -1.766403000 | 0.188965000  |
| C | -3.842301000 | -1.551945000 | 0.258036000  |
| C | -4.397879000 | -0.397839000 | -0.299890000 |
| C | -3.580319000 | 0.534129000  | -0.940397000 |
| C | -2.209925000 | 0.316863000  | -1.008627000 |
| H | -2.028231000 | -2.661032000 | 0.609784000  |
| H | -4.501807000 | -2.265079000 | 0.741658000  |
| H | -4.021691000 | 1.415008000  | -1.393245000 |
| C | -5.868975000 | -0.214574000 | -0.197197000 |
| C | 0.773101000  | 1.229274000  | 0.086251000  |
| H | -0.266668000 | 1.531060000  | 0.223893000  |
| H | 1.103178000  | 1.126476000  | 1.333228000  |
| C | 1.621951000  | 2.307858000  | -0.530299000 |
| H | 2.761229000  | 4.295456000  | -1.446576000 |
| H | 2.748784000  | 5.208015000  | 0.087538000  |
| N | 1.454400000  | 3.560462000  | -0.014970000 |
| H | 0.383756000  | 3.057550000  | 1.735720000  |
| O | 2.418135000  | 2.066169000  | -1.431950000 |
| C | 2.131328000  | 4.677984000  | -0.645920000 |
| H | 1.400009000  | 5.382796000  | -1.059326000 |
| C | 0.522630000  | 3.893443000  | 1.049273000  |
| H | 0.938592000  | 4.726987000  | 1.622285000  |
| H | -0.452747000 | 4.205258000  | 0.652717000  |
| H | 4.692286000  | -3.602729000 | -0.713609000 |
| H | 3.520203000  | 0.529575000  | -0.314862000 |
| C | 1.091335000  | -1.441476000 | 2.653672000  |
| H | 1.445082000  | -1.535734000 | 3.684851000  |
| H | 1.948574000  | -1.377655000 | 1.975900000  |
| H | 0.458326000  | -2.289590000 | 2.382407000  |
| O | 0.268695000  | -0.291977000 | 2.521950000  |
| O | 1.052239000  | 0.828608000  | 2.574925000  |
| O | -6.625468000 | -0.990114000 | 0.336303000  |
| O | -6.298647000 | 0.929641000  | -0.769117000 |
| H | -7.263291000 | 0.944762000  | -0.646722000 |

#### MI TS(C4) CH<sub>2</sub>CHOO'

E = -1353.16075641 Ha

|   |              |              |              |
|---|--------------|--------------|--------------|
| C | 4.217295000  | -1.351643000 | -0.682954000 |
| N | 0.213661000  | -2.270537000 | -0.786294000 |
| C | -0.276497000 | -1.032977000 | -0.585936000 |
| C | 0.748714000  | -0.067493000 | -0.479627000 |
| C | 3.858150000  | -2.713076000 | -0.908712000 |

|   |              |              |              |
|---|--------------|--------------|--------------|
| C | 2.547201000  | -3.096924000 | -0.979027000 |
| C | 1.539897000  | -2.123407000 | -0.820361000 |
| N | 1.912437000  | -0.796417000 | -0.652802000 |
| C | 3.228450000  | -0.418358000 | -0.558130000 |
| H | -1.713583000 | 1.089719000  | -1.517542000 |
| H | 2.241400000  | -4.124156000 | -1.136754000 |
| C | 5.665175000  | -0.951567000 | -0.593619000 |
| H | 6.198546000  | -1.208773000 | -1.514291000 |
| H | 5.769342000  | 0.123733000  | -0.432525000 |
| H | 6.163834000  | -1.469858000 | 0.231901000  |
| C | -1.724801000 | -0.803119000 | -0.487289000 |
| C | -2.528923000 | -1.786097000 | 0.104287000  |
| C | -3.897803000 | -1.599218000 | 0.210029000  |
| C | -4.483733000 | -0.430633000 | -0.282710000 |
| C | -3.695187000 | 0.544055000  | -0.895388000 |
| C | -2.322989000 | 0.354744000  | -1.000173000 |
| H | -2.058810000 | -2.692157000 | 0.472196000  |
| H | -4.535383000 | -2.345718000 | 0.672192000  |
| H | -4.160425000 | 1.436592000  | -1.298763000 |
| C | -5.955725000 | -0.278950000 | -0.143377000 |
| C | 0.672414000  | 1.275112000  | 0.051425000  |
| H | -0.368584000 | 1.552798000  | 0.227123000  |
| H | 1.056993000  | 1.156681000  | 1.260943000  |
| C | 1.476834000  | 2.389428000  | -0.568831000 |
| H | 2.542933000  | 4.422527000  | -1.472244000 |
| H | 2.559508000  | 5.298906000  | 0.082805000  |
| N | 1.299693000  | 3.624692000  | -0.017508000 |
| H | 0.306834000  | 3.060562000  | 1.760302000  |
| O | 2.245771000  | 2.185636000  | -1.502114000 |
| C | 1.930820000  | 4.771947000  | -0.643172000 |
| H | 1.170895000  | 5.468811000  | -1.016342000 |
| C | 0.394713000  | 3.910851000  | 1.083206000  |
| H | 0.803852000  | 4.748322000  | 1.655134000  |
| H | -0.603114000 | 4.197308000  | 0.725317000  |
| H | 4.648057000  | -3.450330000 | -1.022255000 |
| H | 3.413142000  | 0.639120000  | -0.432111000 |
| C | 1.071760000  | -1.412308000 | 2.420911000  |
| O | 0.327160000  | -0.269898000 | 2.539615000  |
| O | 1.092706000  | 0.863814000  | 2.540400000  |
| O | -6.687257000 | -1.092271000 | 0.367943000  |
| O | -6.416081000 | 0.882172000  | -0.653346000 |
| H | -7.378349000 | 0.874509000  | -0.512694000 |
| C | 2.398148000  | -1.496674000 | 2.420888000  |
| H | 2.865162000  | -2.466075000 | 2.300710000  |
| H | 3.018835000  | -0.618852000 | 2.541546000  |
| H | 0.396496000  | -2.255632000 | 2.312969000  |

#### MI radical (COO<sup>•</sup>)

E = -1124.29539623 Ha

|   |              |              |              |
|---|--------------|--------------|--------------|
| C | 4.703624000  | -0.982191000 | 0.128892000  |
| N | 0.835760000  | -2.279066000 | -0.371484000 |
| C | 0.211087000  | -1.119460000 | -0.022060000 |
| C | 1.116496000  | -0.133627000 | 0.342022000  |
| C | 4.507609000  | -2.338987000 | -0.287868000 |
| C | 3.258576000  | -2.847053000 | -0.487911000 |
| C | 2.128391000  | -2.022038000 | -0.256540000 |
| N | 2.351606000  | -0.713480000 | 0.169862000  |
| C | 3.614202000  | -0.194046000 | 0.338595000  |
| H | -1.277404000 | 1.064319000  | -0.642236000 |
| H | 3.084724000  | -3.864108000 | -0.818448000 |
| C | 6.095811000  | -0.437610000 | 0.298579000  |
| H | 6.660781000  | -0.512725000 | -0.636106000 |
| H | 6.077340000  | 0.612932000  | 0.597988000  |
| H | 6.645668000  | -0.999551000 | 1.060790000  |
| C | -1.252443000 | -1.006943000 | -0.040043000 |
| C | -2.037906000 | -2.135458000 | 0.232367000  |
| C | -3.420736000 | -2.042841000 | 0.234157000  |
| C | -4.033865000 | -0.819180000 | -0.044044000 |
| C | -3.265375000 | 0.306085000  | -0.345261000 |
| C | -1.880448000 | 0.207808000  | -0.350559000 |
| H | -1.538214000 | -3.075807000 | 0.439610000  |
| H | -4.045312000 | -2.903950000 | 0.450638000  |
| H | -3.749648000 | 1.246747000  | -0.594795000 |
| C | -5.511016000 | -0.755298000 | -0.024861000 |
| C | 0.915835000  | 1.203091000  | 0.974004000  |
| H | -0.085819000 | 1.226317000  | 1.406178000  |
| H | 1.622869000  | 1.328455000  | 1.807067000  |
| C | 1.172869000  | 2.352101000  | -0.002412000 |
| H | 1.255826000  | 4.189246000  | -1.649782000 |

|   |              |              |              |
|---|--------------|--------------|--------------|
| H | 0.856919000  | 5.378080000  | -0.386114000 |
| N | 0.278821000  | 3.382231000  | -0.008698000 |
| H | -1.572288000 | 2.800473000  | 0.869378000  |
| O | 2.149595000  | 2.312238000  | -0.736133000 |
| C | 0.503079000  | 4.491052000  | -0.924247000 |
| H | -0.429102000 | 4.738506000  | -1.440379000 |
| C | -0.772359000 | 3.539771000  | 0.988621000  |
| H | -0.380550000 | 3.473911000  | 2.008371000  |
| H | -1.209976000 | 4.531389000  | 0.864234000  |
| H | 5.381946000  | -2.959965000 | -0.461185000 |
| H | 3.664355000  | 0.860610000  | 0.579543000  |
| O | -6.279919000 | -1.666829000 | 0.202041000  |
| O | -6.062925000 | 0.422875000  | -0.277296000 |

#### MI TS(COOH) HO<sup>•</sup>

E = -1200.67203139 Ha

|   |              |              |              |
|---|--------------|--------------|--------------|
| C | 5.114508000  | -1.033902000 | 0.128151000  |
| N | 1.228780000  | -2.275788000 | -0.374324000 |
| C | 0.619846000  | -1.107954000 | -0.023975000 |
| C | 1.539288000  | -0.135333000 | 0.340995000  |
| C | 4.899676000  | -2.387356000 | -0.289748000 |
| C | 3.643477000  | -2.877471000 | -0.490581000 |
| C | 2.524853000  | -2.037046000 | -0.258972000 |
| N | 2.766451000  | -0.732023000 | 0.168547000  |
| C | 4.036037000  | -0.230715000 | 0.338039000  |
| H | -0.836182000 | 1.097350000  | -0.643900000 |
| H | 3.455425000  | -3.891721000 | -0.822020000 |
| C | 6.514071000  | -0.508729000 | 0.298660000  |
| H | 7.078403000  | -0.590892000 | -0.635850000 |
| H | 6.509907000  | 0.541815000  | 0.598688000  |
| H | 7.056078000  | -1.078512000 | 1.060722000  |
| C | -0.842103000 | -0.973190000 | -0.040290000 |
| C | -1.645643000 | -2.087580000 | 0.232644000  |
| C | -3.027610000 | -1.972365000 | 0.237031000  |
| C | -3.623742000 | -0.738233000 | -0.036228000 |
| C | -2.834804000 | 0.373030000  | -0.337960000 |
| C | -1.452271000 | 0.251220000  | -0.348715000 |
| H | -1.162296000 | -3.036964000 | 0.437833000  |
| H | -3.660721000 | -2.826706000 | 0.451683000  |
| H | -3.315123000 | 1.314924000  | -0.583424000 |
| C | -5.102492000 | -0.617822000 | -0.019123000 |
| C | 1.357256000  | 1.203531000  | 0.974309000  |
| H | 0.355639000  | 1.239970000  | 1.405526000  |
| H | 2.065962000  | 1.318173000  | 1.807526000  |
| C | 1.630930000  | 2.350017000  | -0.000451000 |
| H | 1.345966000  | 5.378396000  | -0.392199000 |
| H | 0.057962000  | 4.748026000  | -1.449758000 |
| N | 0.747465000  | 3.389020000  | -0.012101000 |
| H | -0.737875000 | 4.552085000  | 0.847667000  |
| O | 2.611807000  | 2.300898000  | -0.728349000 |
| C | 0.985804000  | 4.493262000  | -0.929382000 |
| H | 1.738462000  | 4.182539000  | -1.651230000 |
| C | -0.309117000 | 3.557317000  | 0.977782000  |
| H | -1.113966000 | 2.824154000  | 0.855057000  |
| H | 0.075986000  | 3.491389000  | 2.000148000  |
| H | 5.765225000  | -3.020466000 | -0.463452000 |
| H | 4.100780000  | 0.823011000  | 0.579590000  |
| O | -7.616477000 | -0.178772000 | -0.150440000 |
| H | -7.693877000 | 0.364877000  | 0.653505000  |
| O | -5.812316000 | -1.650506000 | 0.203244000  |
| H | -6.882648000 | -1.120705000 | 0.102231000  |
| O | -5.629233000 | 0.515469000  | -0.217744000 |

#### MI TS(COOH) HOO<sup>•</sup>

E = -1275.77338009 Ha

|   |              |              |              |
|---|--------------|--------------|--------------|
| C | 5.443543000  | -1.089180000 | 0.140892000  |
| N | 1.543283000  | -2.237528000 | -0.458052000 |
| C | 0.948774000  | -1.078776000 | -0.057594000 |
| C | 1.880089000  | -0.136000000 | 0.354950000  |
| C | 5.210429000  | -2.415752000 | -0.346158000 |
| C | 3.947934000  | -2.872170000 | -0.584027000 |
| C | 2.842059000  | -2.023778000 | -0.323385000 |
| N | 3.100757000  | -0.743633000 | 0.165062000  |
| C | 4.377507000  | -0.276025000 | 0.376387000  |
| H | -0.482379000 | 1.163735000  | -0.580243000 |
| H | 3.745096000  | -3.866077000 | -0.964781000 |
| C | 6.849778000  | -0.599634000 | 0.357290000  |
| H | 7.427317000  | -0.647294000 | -0.571570000 |
| H | 6.859866000  | 0.434990000  | 0.708069000  |

|   |              |              |              |
|---|--------------|--------------|--------------|
| H | 7.369243000  | -1.215792000 | 1.098707000  |
| C | -0.511930000 | -0.927120000 | -0.062304000 |
| C | -1.327124000 | -2.041081000 | 0.176499000  |
| C | -2.707063000 | -1.906794000 | 0.198896000  |
| C | -3.291202000 | -0.656108000 | -0.020622000 |
| C | -2.489915000 | 0.454410000  | -0.287429000 |
| C | -1.108785000 | 0.315499000  | -0.315637000 |
| H | -0.854272000 | -3.002894000 | 0.345201000  |
| H | -3.345651000 | -2.762439000 | 0.392941000  |
| H | -2.964327000 | 1.410343000  | -0.484117000 |
| C | -4.772658000 | -0.493242000 | 0.008579000  |
| C | 1.711175000  | 1.173448000  | 1.055984000  |
| H | 0.715824000  | 1.182662000  | 1.497455000  |
| H | 2.430354000  | 1.240074000  | 1.883249000  |
| C | 2.011045000  | 2.356819000  | 0.134003000  |
| H | 0.512200000  | 4.644236000  | -1.587618000 |
| H | 2.215690000  | 4.101321000  | -1.616337000 |
| N | 1.062480000  | 3.318716000  | -0.071575000 |
| H | -0.030224000 | 4.441293000  | 1.329013000  |
| O | 3.097034000  | 2.389207000  | -0.428860000 |
| C | 1.390049000  | 4.408579000  | -0.978568000 |
| H | 1.680685000  | 5.306654000  | -0.419540000 |
| C | -0.140173000 | 3.541758000  | 0.710268000  |
| H | -0.991759000 | 3.693196000  | 0.037516000  |
| H | -0.370991000 | 2.701668000  | 1.360296000  |
| H | 6.066532000  | -3.055743000 | -0.540485000 |
| H | 4.457133000  | 0.763287000  | 0.669734000  |
| O | -7.580579000 | 0.240372000  | -0.426974000 |
| H | -6.548788000 | 0.628342000  | -0.244310000 |
| O | -5.472708000 | -1.548733000 | 0.092186000  |
| H | -7.764822000 | -1.577592000 | -0.077082000 |
| O | -5.254250000 | 0.675257000  | -0.054014000 |
| O | -7.496193000 | -0.800599000 | 0.453626000  |

#### MI TS(COOH) CH<sub>3</sub>O'

E = -1239.94753492 Ha

|   |              |              |              |
|---|--------------|--------------|--------------|
| C | 5.486240000  | -0.965179000 | 0.193829000  |
| N | 1.637404000  | -2.275131000 | -0.410612000 |
| C | 0.998105000  | -1.123287000 | -0.061348000 |
| C | 1.890220000  | -0.137396000 | 0.334615000  |
| C | 5.307122000  | -2.317489000 | -0.243654000 |
| C | 4.065357000  | -2.829016000 | -0.478571000 |
| C | 2.925759000  | -2.012890000 | -0.263464000 |
| N | 3.132459000  | -0.708271000 | 0.183478000  |
| C | 4.387874000  | -0.185024000 | 0.387545000  |
| H | -0.485504000 | 1.058206000  | -0.695643000 |
| H | 3.904465000  | -3.842931000 | -0.825041000 |
| C | 6.871097000  | -0.415313000 | 0.402624000  |
| H | 7.458399000  | -0.475778000 | -0.519314000 |
| H | 6.839536000  | 0.631424000  | 0.714155000  |
| H | 7.406444000  | -0.983300000 | 1.170731000  |
| C | -0.465487000 | -1.015736000 | -0.107652000 |
| C | -1.254613000 | -2.145679000 | 0.146025000  |
| C | -2.637500000 | -2.053897000 | 0.124137000  |
| C | -3.252744000 | -0.830540000 | -0.155449000 |
| C | -2.477652000 | 0.295228000  | -0.439623000 |
| C | -1.091896000 | 0.197907000  | -0.421512000 |
| H | -0.758634000 | -3.086722000 | 0.359936000  |
| H | -3.263676000 | -2.915929000 | 0.329851000  |
| H | -2.962989000 | 1.234171000  | -0.685376000 |
| C | -4.747049000 | -0.784460000 | -0.153342000 |
| C | 1.667331000  | 1.189497000  | 0.979910000  |
| H | 0.655768000  | 1.200371000  | 1.388691000  |
| H | 2.354872000  | 1.307649000  | 1.830222000  |
| C | 1.939896000  | 2.353891000  | 0.026642000  |
| H | 2.052208000  | 4.211532000  | -1.595273000 |
| H | 1.601933000  | 5.379528000  | -0.329470000 |
| N | 1.033434000  | 3.372865000  | 0.003727000  |
| H | -0.828717000 | 2.747044000  | 0.825670000  |
| O | 2.940680000  | 2.336537000  | -0.675327000 |
| C | 1.274245000  | 4.495945000  | -0.889601000 |
| H | 0.355834000  | 4.740669000  | -1.431087000 |
| C | -0.051469000 | 3.505719000  | 0.968251000  |
| H | 0.310676000  | 3.451066000  | 1.999782000  |
| H | -0.509270000 | 4.486023000  | 0.827854000  |
| H | 6.188384000  | -2.932128000 | -0.404228000 |
| H | 4.426731000  | 0.866928000  | 0.642088000  |
| O | -7.467701000 | 0.605921000  | -0.189970000 |
| O | -5.447189000 | -1.688540000 | 0.262882000  |

|   |              |              |              |
|---|--------------|--------------|--------------|
| O | -5.228327000 | 0.335551000  | -0.670219000 |
| H | -6.612943000 | 0.305120000  | -0.704370000 |
| C | -7.969967000 | -0.382473000 | 0.668954000  |
| H | -8.099113000 | -1.344629000 | 0.168113000  |
| H | -7.302567000 | -0.526375000 | 1.528317000  |
| H | -8.923838000 | 0.007209000  | 1.039428000  |

#### MI

E = -1124.97756556 Ha

|   |              |              |              |
|---|--------------|--------------|--------------|
| C | 3.769567000  | -0.817868000 | 0.041745000  |
| N | 0.001302000  | -2.324649000 | -0.388782000 |
| C | -0.691491000 | -1.200272000 | -0.031595000 |
| C | 0.155461000  | -0.163538000 | 0.315155000  |
| C | 3.668612000  | -2.181196000 | -0.373629000 |
| C | 2.446545000  | -2.756985000 | -0.546972000 |
| C | 1.274036000  | -1.996784000 | -0.295150000 |
| N | 1.426314000  | -0.666771000 | 0.126048000  |
| C | 2.646043000  | -0.074644000 | 0.270971000  |
| H | -2.318661000 | 0.868139000  | -0.702501000 |
| H | 2.322711000  | -3.782600000 | -0.872841000 |
| C | 5.115831000  | -0.222833000 | 0.190950000  |
| C | -2.160570000 | -1.170999000 | -0.027403000 |
| C | -2.884438000 | -2.322956000 | 0.300898000  |
| C | -4.271492000 | -2.299245000 | 0.319151000  |
| C | -4.981968000 | -1.134018000 | 0.007587000  |
| C | -4.256558000 | 0.004305000  | -0.343837000 |
| C | -2.864373000 | -0.012515000 | -0.369073000 |
| H | -2.338525000 | -3.231258000 | 0.535978000  |
| H | -4.820203000 | -3.201576000 | 0.578870000  |
| H | -6.904819000 | -1.953904000 | -0.530633000 |
| H | -4.788008000 | 0.911108000  | -0.623223000 |
| C | -6.488692000 | -1.122721000 | 0.047072000  |
| H | -6.855947000 | -1.223898000 | 1.074120000  |
| H | -6.889793000 | -0.191814000 | -0.361787000 |
| C | -0.120211000 | 1.165816000  | 0.931668000  |
| H | -1.122587000 | 1.133270000  | 1.361429000  |
| H | 0.578014000  | 1.345798000  | 1.762308000  |
| C | 0.069293000  | 2.311490000  | -0.063433000 |
| H | 0.066854000  | 4.137800000  | -1.719686000 |
| H | -0.446080000 | 5.318033000  | -0.488897000 |
| N | -0.876805000 | 3.292806000  | -0.079325000 |
| H | -2.697030000 | 2.602950000  | 0.783224000  |
| O | 1.044274000  | 2.311750000  | -0.801249000 |
| C | -0.720684000 | 4.396194000  | -1.014558000 |
| H | -1.658585000 | 4.561799000  | -1.553131000 |
| C | -1.947583000 | 3.393129000  | 0.904141000  |
| H | -1.563468000 | 3.362208000  | 1.928497000  |
| H | -2.444446000 | 4.354465000  | 0.764643000  |
| H | 4.588313000  | -2.725664000 | -0.555387000 |
| H | 2.656043000  | 0.979367000  | 0.516961000  |
| O | 5.084166000  | 1.058808000  | 0.611229000  |
| H | 6.010605000  | 1.349842000  | 0.660931000  |
| O | 6.149806000  | -0.806799000 | -0.028305000 |

#### MI radical (C4)

E = -1124.33830637 Ha

|   |              |              |              |
|---|--------------|--------------|--------------|
| C | 3.465489000  | -1.313723000 | 0.018345000  |
| N | -0.485676000 | -2.321223000 | 0.009807000  |
| C | -1.029388000 | -1.092285000 | -0.035998000 |
| C | -0.036691000 | -0.063914000 | -0.053438000 |
| C | 3.158242000  | -2.704066000 | 0.047597000  |
| C | 1.855128000  | -3.110278000 | 0.035698000  |
| C | 0.830623000  | -2.140777000 | -0.002909000 |
| N | 1.170479000  | -0.783516000 | -0.055605000 |
| C | 2.473873000  | -0.372027000 | -0.034762000 |
| H | -2.521430000 | 0.788401000  | -1.369844000 |
| H | 1.560331000  | -4.152031000 | 0.063828000  |
| C | 4.891331000  | -0.910899000 | 0.036470000  |
| C | -2.486722000 | -0.924817000 | -0.061410000 |
| C | -3.285390000 | -1.856892000 | 0.616442000  |
| C | -4.666815000 | -1.744128000 | 0.600946000  |
| C | -5.301077000 | -0.709353000 | -0.096503000 |
| C | -4.504088000 | 0.199444000  | -0.792818000 |
| C | -3.116521000 | 0.096911000  | -0.781255000 |
| H | -2.799398000 | -2.668070000 | 1.148909000  |
| H | -5.270667000 | -2.472761000 | 1.136464000  |
| H | -7.280238000 | -1.558730000 | -0.235475000 |
| H | -4.976497000 | 0.991877000  | -1.367637000 |
| C | -6.802691000 | -0.585705000 | -0.086891000 |

|   |              |              |              |
|---|--------------|--------------|--------------|
| H | -7.156629000 | -0.191387000 | 0.872178000  |
| H | -7.150852000 | 0.088832000  | -0.873209000 |
| C | -0.264315000 | 1.306519000  | 0.066115000  |
| H | -1.294624000 | 1.557368000  | 0.284785000  |
| C | 0.665746000  | 2.403041000  | -0.202560000 |
| H | 1.840747000  | 4.483413000  | -0.824507000 |
| H | 1.496525000  | 5.311252000  | 0.716244000  |
| N | 0.303133000  | 3.638807000  | 0.274123000  |
| H | -1.763082000 | 4.048998000  | 0.570018000  |
| O | 1.698125000  | 2.252784000  | -0.864857000 |
| C | 1.051304000  | 4.805988000  | -0.148793000 |
| H | 0.392807000  | 5.515601000  | -0.664428000 |
| C | -0.837292000 | 3.876344000  | 1.135787000  |
| H | -0.988547000 | 3.039188000  | 1.819280000  |
| H | -0.636918000 | 4.766653000  | 1.738354000  |
| H | 3.980232000  | -3.410336000 | 0.080258000  |
| H | 2.650801000  | 0.693337000  | -0.102367000 |
| O | 5.063648000  | 0.423506000  | 0.038282000  |
| H | 6.023949000  | 0.576428000  | 0.038845000  |
| O | 5.814912000  | -1.689141000 | 0.052781000  |

**MII TS(C4) HO'**

E = -1200.66902887 Ha

|   |              |              |              |
|---|--------------|--------------|--------------|
| C | 3.376549000  | -1.379093000 | -0.069072000 |
| N | -0.561798000 | -2.433329000 | -0.269606000 |
| C | -1.101078000 | -1.198122000 | -0.073347000 |
| C | -0.117638000 | -0.226999000 | 0.088104000  |
| C | 3.094439000  | -2.756926000 | -0.306322000 |
| C | 1.804003000  | -3.190496000 | -0.394388000 |
| C | 0.748287000  | -2.258110000 | -0.245824000 |
| N | 1.075621000  | -0.913591000 | -0.032214000 |
| C | 2.362146000  | -0.469851000 | 0.057428000  |
| H | -2.528509000 | 0.927257000  | -1.013120000 |
| H | 1.543784000  | -4.226972000 | -0.570877000 |
| C | 4.792899000  | -0.956350000 | 0.025139000  |
| C | -2.556193000 | -0.999317000 | -0.049981000 |
| C | -3.382404000 | -2.011194000 | 0.454671000  |
| C | -4.758106000 | -1.841400000 | 0.490132000  |
| C | -5.355480000 | -0.665923000 | 0.019573000  |
| C | -4.529863000 | 0.327990000  | -0.505338000 |
| C | -3.147988000 | 0.165495000  | -0.546992000 |
| H | -2.924047000 | -2.928027000 | 0.811617000  |
| H | -5.387017000 | -2.634538000 | 0.887579000  |
| H | -7.367623000 | -1.364091000 | -0.330024000 |
| H | -4.975199000 | 1.235174000  | -0.905583000 |
| C | -6.851111000 | -0.490731000 | 0.079825000  |
| H | -7.190176000 | -0.367098000 | 1.114167000  |
| H | -7.171026000 | 0.388927000  | -0.484344000 |
| C | -0.179112000 | 1.186185000  | 0.475744000  |
| H | -1.198068000 | 1.457036000  | 0.764549000  |
| C | 0.465557000  | 1.353774000  | 1.420262000  |
| C | 0.416734000  | 2.157181000  | -0.544860000 |
| H | 1.509454000  | 5.102292000  | -0.765265000 |
| H | -0.086738000 | 5.091857000  | -1.554463000 |
| N | 0.277933000  | 3.479417000  | -0.258240000 |
| H | 0.029026000  | 4.978115000  | 1.151220000  |
| O | 0.989323000  | 1.737715000  | -1.539406000 |
| C | 0.745292000  | 4.462120000  | -1.219229000 |
| H | 1.170825000  | 3.935585000  | -2.071376000 |
| C | -0.375463000 | 3.985850000  | 0.936953000  |
| H | -1.461137000 | 4.080719000  | 0.803926000  |
| H | -0.162265000 | 3.354156000  | 1.800233000  |
| H | 3.933374000  | -3.435309000 | -0.413727000 |
| H | 2.516607000  | 0.588483000  | 0.226919000  |
| O | 1.620156000  | 1.737346000  | 2.349390000  |
| H | 1.707014000  | 0.887074000  | 2.825798000  |
| O | 5.735463000  | -1.700648000 | -0.099164000 |
| O | 4.933594000  | 0.359873000  | 0.274527000  |
| H | 5.890108000  | 0.531960000  | 0.306868000  |

**MII TS(C4) HOO'**

E = -1275.79304623 Ha

|   |              |              |              |
|---|--------------|--------------|--------------|
| C | 3.373864000  | -1.349470000 | -0.223614000 |
| N | -0.571105000 | -2.369267000 | -0.418590000 |
| C | -1.104154000 | -1.131191000 | -0.293388000 |
| C | -0.113332000 | -0.140874000 | -0.199412000 |
| C | 3.079427000  | -2.731340000 | -0.402027000 |
| C | 1.783501000  | -3.150136000 | -0.492497000 |
| C | 0.744650000  | -2.195398000 | -0.407272000 |

|   |              |              |              |
|---|--------------|--------------|--------------|
| N | 1.080052000  | -0.846803000 | -0.282597000 |
| C | 2.368926000  | -0.423222000 | -0.163696000 |
| H | -2.569996000 | 0.930023000  | -1.337923000 |
| H | 1.507713000  | -4.190474000 | -0.612907000 |
| C | 4.792906000  | -0.941311000 | -0.105927000 |
| C | -2.559801000 | -0.936945000 | -0.262387000 |
| C | -3.368111000 | -1.925330000 | 0.314186000  |
| C | -4.745343000 | -1.769288000 | 0.359373000  |
| C | -5.362986000 | -0.631675000 | -0.173283000 |
| C | -4.555841000 | 0.337183000  | -0.770045000 |
| C | -3.173029000 | 0.189350000  | -0.820415000 |
| H | -2.894399000 | -2.815538000 | 0.716009000  |
| H | -5.359015000 | -2.544504000 | 0.811979000  |
| H | -5.017390000 | 1.212768000  | -1.219305000 |
| C | -6.858998000 | -0.466499000 | -0.099730000 |
| H | -7.372696000 | -1.388851000 | -0.386827000 |
| H | -7.176229000 | -0.219889000 | 0.919558000  |
| C | -0.209310000 | 1.247883000  | 0.189366000  |
| H | -1.246700000 | 1.534356000  | 0.369642000  |
| H | 0.300942000  | 1.250943000  | 1.362426000  |
| C | 0.569595000  | 2.281870000  | -0.587254000 |
| H | 1.609820000  | 4.188372000  | -1.754812000 |
| H | 1.712006000  | 5.223974000  | -0.305292000 |
| N | 0.423003000  | 3.573973000  | -0.171655000 |
| H | -1.434353000 | 4.238041000  | 0.612553000  |
| O | 1.296523000  | 1.963720000  | -1.519669000 |
| C | 1.041552000  | 4.636808000  | -0.942270000 |
| H | 0.276412000  | 5.305400000  | -1.354346000 |
| C | -0.416262000 | 3.986119000  | 0.938316000  |
| H | -0.465358000 | 3.214424000  | 1.707578000  |
| H | 0.025655000  | 4.876815000  | 1.393523000  |
| H | 3.910275000  | -3.426022000 | -0.454874000 |
| H | 2.538476000  | 0.637963000  | -0.051811000 |
| O | 0.693245000  | 0.966336000  | 2.551658000  |
| O | 0.477033000  | -0.390847000 | 2.580087000  |
| H | -0.415693000 | -0.475344000 | 2.959606000  |
| H | -7.203075000 | 0.334414000  | -0.758946000 |
| O | 5.726709000  | -1.704383000 | -0.165748000 |
| O | 4.946764000  | 0.383548000  | 0.079290000  |
| H | 5.904230000  | 0.541616000  | 0.140978000  |

**MII TS(C4) CH<sub>3</sub>O'**

E = -1239.96570207 Ha

|   |              |              |              |
|---|--------------|--------------|--------------|
| C | 3.307350000  | -1.374491000 | -0.266545000 |
| N | -0.644327000 | -2.385763000 | -0.422956000 |
| C | -1.170000000 | -1.145954000 | -0.241474000 |
| C | -0.173254000 | -0.173395000 | -0.118019000 |
| C | 3.007264000  | -2.751250000 | -0.481992000 |
| C | 1.710667000  | -3.170127000 | -0.560100000 |
| C | 0.669812000  | -2.221237000 | -0.424052000 |
| N | 1.013004000  | -0.877834000 | -0.244878000 |
| C | 2.304343000  | -0.450966000 | -0.153151000 |
| H | -2.597341000 | 0.981156000  | -1.179077000 |
| H | 1.436045000  | -4.206499000 | -0.713382000 |
| C | 4.729614000  | -0.969883000 | -0.173224000 |
| C | -2.622456000 | -0.935805000 | -0.196636000 |
| C | -3.446269000 | -1.937676000 | 0.331040000  |
| C | -4.820425000 | -1.759508000 | 0.385171000  |
| C | -5.417703000 | -0.585792000 | -0.089153000 |
| C | -4.594267000 | 0.397722000  | -0.637751000 |
| C | -3.214436000 | 0.227744000  | -0.697244000 |
| H | -2.987958000 | -2.853572000 | 0.690426000  |
| H | -5.447756000 | -2.544800000 | 0.800021000  |
| H | -7.243841000 | 0.425899000  | -0.640974000 |
| H | -5.040565000 | 1.302730000  | -1.041756000 |
| C | -6.910264000 | -0.396783000 | -0.003442000 |
| H | -7.441539000 | -1.302846000 | -0.309536000 |
| H | -7.217378000 | -0.169099000 | 1.023363000  |
| C | -0.209625000 | 1.229159000  | 0.277600000  |
| H | -1.222339000 | 1.533564000  | 0.553080000  |
| H | 0.431057000  | 1.307110000  | 1.283393000  |
| C | 0.465456000  | 2.213353000  | -0.667059000 |
| H | 0.172186000  | 5.237418000  | -1.456764000 |
| H | 1.350519000  | 4.041109000  | -2.062446000 |
| N | 0.436577000  | 3.518248000  | -0.277949000 |
| H | -1.241202000 | 4.211023000  | 0.825394000  |
| O | 1.008245000  | 1.828703000  | -1.692931000 |
| C | 0.962584000  | 4.533071000  | -1.172501000 |
| H | 1.767632000  | 5.090147000  | -0.681088000 |

|   |              |              |              |
|---|--------------|--------------|--------------|
| C | -0.174664000 | 3.984795000  | 0.955287000  |
| H | -0.049153000 | 3.257896000  | 1.759282000  |
| H | 0.332836000  | 4.903232000  | 1.261416000  |
| H | 3.837267000  | -3.442507000 | -0.576474000 |
| H | 2.473642000  | 0.604660000  | 0.010381000  |
| C | 0.971536000  | -0.091163000 | 2.920370000  |
| H | 0.690937000  | -0.037974000 | 3.981661000  |
| H | 1.823707000  | -0.774327000 | 2.787402000  |
| H | 0.109195000  | -0.544147000 | 2.391493000  |
| O | 1.234254000  | 1.172952000  | 2.417130000  |
| O | 5.660377000  | -1.733190000 | -0.266046000 |
| O | 4.888244000  | 0.351191000  | 0.031373000  |
| H | 5.846739000  | 0.509138000  | 0.075713000  |

**MII TS(C4) CH<sub>3</sub>OO'**

E = -1315.08521306 Ha

|   |              |              |              |
|---|--------------|--------------|--------------|
| C | 3.474900000  | -1.258459000 | -0.342860000 |
| N | -0.455132000 | -2.320972000 | -0.593183000 |
| C | -1.006230000 | -1.087741000 | -0.486538000 |
| C | -0.029840000 | -0.082237000 | -0.379923000 |
| C | 3.197100000  | -2.646093000 | -0.510189000 |
| C | 1.907018000  | -3.075647000 | -0.624175000 |
| C | 0.856432000  | -2.130509000 | -0.567123000 |
| N | 1.174475000  | -0.772675000 | -0.442810000 |
| C | 2.463227000  | -0.338001000 | -0.316738000 |
| H | -2.480217000 | 0.910014000  | -1.626352000 |
| H | 1.641714000  | -4.119033000 | -0.742872000 |
| C | 4.889322000  | -0.835891000 | -0.210176000 |
| C | -2.464120000 | -0.912898000 | -0.478626000 |
| C | -3.265883000 | -1.886723000 | 0.128144000  |
| C | -4.645689000 | -1.748503000 | 0.146922000  |
| C | -5.270071000 | -0.643918000 | -0.443211000 |
| C | -4.467586000 | 0.310340000  | -1.069489000 |
| C | -3.082662000 | 0.180430000  | -1.092220000 |
| H | -2.787563000 | -2.751425000 | 0.577509000  |
| H | -5.255379000 | -2.510644000 | 0.626055000  |
| H | -7.119776000 | 0.226926000  | -1.137871000 |
| H | -4.934118000 | 1.160298000  | -1.560815000 |
| C | -6.768418000 | -0.491915000 | -0.393229000 |
| H | -7.269426000 | -1.446817000 | -0.577003000 |
| H | -7.092062000 | -0.136721000 | 0.591481000  |
| C | -0.184900000 | 1.284787000  | 0.062880000  |
| H | -1.243322000 | 1.531683000  | 0.162597000  |
| O | 0.110683000  | 1.229047000  | 1.322718000  |
| C | 0.626980000  | 2.387550000  | -0.560681000 |
| H | 1.704197000  | 4.399345000  | -1.497356000 |
| H | 1.598302000  | 5.352220000  | 0.008222000  |
| N | 0.385530000  | 3.643880000  | -0.087602000 |
| H | -0.711565000 | 3.135781000  | 1.644680000  |
| O | 1.457688000  | 2.157517000  | -1.433790000 |
| C | 1.030751000  | 4.774147000  | -0.729153000 |
| H | 0.281894000  | 5.431949000  | -1.186269000 |
| C | -0.590347000 | 3.960322000  | 0.941357000  |
| H | -0.228619000 | 4.825389000  | 1.504338000  |
| H | -1.566678000 | 4.217778000  | 0.509778000  |
| H | 4.034935000  | -3.333687000 | -0.540172000 |
| H | 2.621417000  | 0.728388000  | -0.240618000 |
| C | 0.141343000  | -1.302751000 | 2.712053000  |
| H | 0.487392000  | -1.343815000 | 3.749156000  |
| H | 1.003785000  | -1.243452000 | 2.040430000  |
| H | -0.464196000 | -2.179143000 | 2.470257000  |
| O | -0.713027000 | -0.184846000 | 2.524484000  |
| O | 0.033157000  | 0.961519000  | 2.567086000  |
| O | 5.829700000  | -1.591720000 | -0.252833000 |
| O | 5.027906000  | 0.490721000  | -0.028824000 |
| H | 5.983162000  | 0.661031000  | 0.036121000  |

**MII TS(C4) CH<sub>2</sub>CHOO'**

E = -1353.15988827 Ha

|   |              |              |              |
|---|--------------|--------------|--------------|
| C | 3.411195000  | -1.165418000 | -0.524226000 |
| N | -0.507620000 | -2.273631000 | -0.736326000 |
| C | -1.072027000 | -1.055770000 | -0.574181000 |
| C | -0.104371000 | -0.039096000 | -0.454759000 |
| C | 3.150183000  | -2.547458000 | -0.744187000 |
| C | 1.863074000  | -2.991571000 | -0.847186000 |
| C | 0.803718000  | -2.063907000 | -0.731893000 |
| N | 1.104192000  | -0.708153000 | -0.578064000 |
| C | 2.385551000  | -0.262438000 | -0.444156000 |
| H | -2.597479000 | 0.973999000  | -1.584639000 |

|   |              |              |              |
|---|--------------|--------------|--------------|
| H | 1.609388000  | -4.033565000 | -0.998841000 |
| C | -2.530925000 | -0.900620000 | -0.524658000 |
| C | -3.306375000 | -1.913262000 | 0.052977000  |
| C | -4.686729000 | -1.794075000 | 0.1111029000 |
| C | -5.338391000 | -0.670695000 | -0.410484000 |
| C | -4.562840000 | 0.322710000  | -1.009262000 |
| C | -3.177476000 | 0.212517000  | -1.070688000 |
| H | -2.806814000 | -2.792441000 | 0.447837000  |
| H | -5.275563000 | -2.586231000 | 0.566969000  |
| H | -5.051339000 | 1.188627000  | -1.448526000 |
| C | -0.261750000 | 1.309980000  | 0.039158000  |
| H | -1.319422000 | 1.540055000  | 0.179894000  |
| H | 0.096576000  | 1.241261000  | 1.262815000  |
| C | 0.510686000  | 2.439897000  | -0.593420000 |
| H | 1.524295000  | 4.485947000  | -1.526062000 |
| H | 1.456350000  | 5.407536000  | 0.000994000  |
| N | 0.267170000  | 3.682236000  | -0.086795000 |
| H | -0.750923000 | 3.127043000  | 1.678974000  |
| O | 1.312387000  | 2.238308000  | -1.499084000 |
| C | 0.872369000  | 4.835066000  | -0.727773000 |
| H | 0.098046000  | 5.489401000  | -1.145600000 |
| C | -0.677497000 | 3.962070000  | 0.981426000  |
| H | -0.316456000 | 4.829579000  | 1.540817000  |
| H | -1.675513000 | 4.199498000  | 0.589848000  |
| H | 3.996632000  | -3.221145000 | -0.818588000 |
| H | 2.531088000  | 0.801309000  | -0.320594000 |
| C | 0.209814000  | -1.295052000 | 2.487993000  |
| O | -0.591248000 | -0.187110000 | 2.559119000  |
| O | 0.118939000  | 0.981834000  | 2.544869000  |
| C | 1.538454000  | -1.315782000 | 2.519099000  |
| H | 2.053802000  | -2.264712000 | 2.438887000  |
| H | 2.114772000  | -0.406753000 | 2.631097000  |
| H | -0.422346000 | -2.172307000 | 2.389550000  |
| C | 4.820232000  | -0.728045000 | -0.387489000 |
| H | -7.212599000 | 0.222879000  | -1.002928000 |
| C | -6.836843000 | -0.541981000 | -0.318587000 |
| H | -7.330572000 | -1.488077000 | -0.559110000 |
| H | -7.142840000 | -0.261792000 | 0.695470000  |
| O | 5.771991000  | -1.464872000 | -0.480335000 |
| O | 4.940502000  | 0.589669000  | -0.137811000 |
| H | 5.893850000  | 0.771688000  | -0.076428000 |

**MII radical (COO')**

E = -1124.28074695 Ha

|   |              |              |              |
|---|--------------|--------------|--------------|
| C | 3.798951000  | -0.811121000 | 0.046262000  |
| N | 0.033521000  | -2.319224000 | -0.385868000 |
| C | -0.663281000 | -1.196099000 | -0.024140000 |
| C | 0.181456000  | -0.161127000 | 0.328759000  |
| C | 3.700049000  | -2.172837000 | -0.375696000 |
| C | 2.477986000  | -2.749017000 | -0.548114000 |
| C | 1.303955000  | -1.991097000 | -0.290358000 |
| N | 1.454529000  | -0.662021000 | 0.137886000  |
| C | 2.670551000  | -0.069992000 | 0.283847000  |
| H | -2.289826000 | 0.871817000  | -0.696329000 |
| H | 2.353872000  | -3.773252000 | -0.878431000 |
| C | 5.126724000  | -0.185428000 | 0.208913000  |
| C | -2.132173000 | -1.169165000 | -0.025265000 |
| C | -2.855369000 | -2.322951000 | 0.297678000  |
| C | -4.242472000 | -2.300727000 | 0.310840000  |
| C | -4.952932000 | -1.135570000 | -0.001041000 |
| C | -4.227660000 | 0.004549000  | -0.347275000 |
| C | -2.835534000 | -0.010381000 | -0.366989000 |
| H | -2.309895000 | -3.231439000 | 0.533084000  |
| H | -4.791108000 | -3.204156000 | 0.566559000  |
| H | -6.872256000 | -1.955707000 | -0.550192000 |
| H | -4.759154000 | 0.911201000  | -0.626697000 |
| C | -6.459712000 | -1.126247000 | 0.032467000  |
| H | -6.830476000 | -1.232184000 | 1.057718000  |
| H | -6.860425000 | -0.194252000 | -0.374120000 |
| C | -0.095067000 | 1.169582000  | 0.940882000  |
| H | -1.101663000 | 1.141837000  | 1.360874000  |
| H | 0.595594000  | 1.349289000  | 1.777801000  |
| C | 0.109825000  | 2.309759000  | -0.058485000 |
| H | 0.142735000  | 4.139375000  | -1.710149000 |
| H | -0.375175000 | 5.324717000  | -0.486309000 |
| N | -0.821009000 | 3.303725000  | -0.075994000 |
| H | -2.656657000 | 2.637879000  | 0.772653000  |
| O | 1.085050000  | 2.291509000  | -0.796086000 |
| C | -0.649920000 | 4.403840000  | -1.013104000 |

|   |              |              |              |
|---|--------------|--------------|--------------|
| H | -1.581793000 | 4.573252000  | -1.560840000 |
| C | -1.895671000 | 3.415716000  | 0.902077000  |
| H | -1.517628000 | 3.373746000  | 1.928170000  |
| H | -2.376679000 | 4.385311000  | 0.764806000  |
| H | 4.618290000  | -2.717954000 | -0.562970000 |
| H | 2.684393000  | 0.981345000  | 0.539797000  |
| O | 5.124037000  | 1.093586000  | 0.622041000  |
| O | 6.178454000  | -0.766132000 | -0.000346000 |

**MI TS(COOH) HO'**

E = -1200.66267720 Ha

|   |              |              |              |
|---|--------------|--------------|--------------|
| C | 3.365883000  | -1.050803000 | -0.052349000 |
| N | -0.477835000 | -2.372149000 | -0.396656000 |
| C | -1.107808000 | -1.212361000 | -0.034194000 |
| C | -0.204485000 | -0.216756000 | 0.289205000  |
| C | 3.191773000  | -2.412050000 | -0.451135000 |
| C | 1.939025000  | -2.926409000 | -0.596977000 |
| C | 0.810354000  | -2.107124000 | -0.330934000 |
| N | 1.036300000  | -0.782779000 | 0.077578000  |
| C | 2.284857000  | -0.249736000 | 0.191301000  |
| H | -2.640622000 | 0.929453000  | -0.693622000 |
| H | 1.758881000  | -3.948249000 | -0.908172000 |
| C | 4.748318000  | -0.520057000 | 0.067961000  |
| C | -2.573198000 | -1.109796000 | -0.003502000 |
| C | -3.347639000 | -2.221215000 | 0.348104000  |
| C | -4.731112000 | -2.127176000 | 0.391420000  |
| C | -5.387586000 | -0.930047000 | 0.082244000  |
| C | -4.612532000 | 0.167400000  | -0.292511000 |
| C | -3.223756000 | 0.080131000  | -0.342686000 |
| H | -2.844203000 | -3.154137000 | 0.581585000  |
| H | -5.319677000 | -2.998438000 | 0.669159000  |
| H | -5.102790000 | 1.097565000  | -0.570203000 |
| C | -6.890837000 | -0.842569000 | 0.148439000  |
| H | -7.251582000 | 0.107415000  | -0.254029000 |
| H | -7.358566000 | -1.651654000 | -0.421099000 |
| C | -0.401715000 | 1.129368000  | 0.899072000  |
| H | -1.397497000 | 1.151703000  | 1.344449000  |
| H | 0.317699000  | 1.279274000  | 1.717522000  |
| C | -0.167878000 | 2.255276000  | -0.109279000 |
| H | -0.524606000 | 5.284909000  | -0.541542000 |
| H | -1.788697000 | 4.589232000  | -1.586956000 |
| N | -1.056822000 | 3.287784000  | -0.115590000 |
| H | -1.706961000 | 3.410317000  | 1.902038000  |
| O | 0.792032000  | 2.194148000  | -0.864497000 |
| C | -0.854179000 | 4.376742000  | -1.059117000 |
| H | -0.090427000 | 4.073593000  | -1.772494000 |
| C | -2.105201000 | 3.451834000  | 0.883465000  |
| H | -2.554282000 | 4.436072000  | 0.742103000  |
| H | -2.895970000 | 2.700263000  | 0.781267000  |
| H | 4.079071000  | -3.005253000 | -0.639339000 |
| H | 2.351040000  | 0.804196000  | 0.429610000  |
| O | 6.968851000  | 1.041417000  | 0.636706000  |
| H | -7.244251000 | -0.925229000 | 1.181935000  |
| O | 5.736327000  | -1.219945000 | -0.069099000 |
| O | 4.783317000  | 0.781172000  | 0.333432000  |
| H | 5.939830000  | 1.203548000  | 0.239539000  |
| H | 7.124192000  | 0.103187000  | 0.377432000  |

**MI TS(COOH) HOO'**

E = -1275.77204546 Ha

|   |              |              |              |
|---|--------------|--------------|--------------|
| C | 3.054752000  | -1.039995000 | -0.084012000 |
| N | -0.790461000 | -2.368940000 | -0.401527000 |
| C | -1.419565000 | -1.209691000 | -0.036666000 |
| C | -0.515472000 | -0.211619000 | 0.277191000  |
| C | 2.879578000  | -2.399895000 | -0.486029000 |
| C | 1.626325000  | -2.917258000 | -0.621838000 |
| C | 0.498242000  | -2.100880000 | -0.345302000 |
| N | 0.724381000  | -0.775725000 | 0.058898000  |
| C | 1.973922000  | -0.243746000 | 0.169087000  |
| H | -2.966311000 | 0.931906000  | -0.673203000 |
| H | 1.444925000  | -3.937640000 | -0.936999000 |
| C | 4.409414000  | -0.445186000 | 0.056946000  |
| C | -2.885011000 | -1.110652000 | 0.006684000  |
| C | -3.653166000 | -2.225966000 | 0.360119000  |
| C | -5.036507000 | -2.136913000 | 0.415994000  |
| C | -5.699672000 | -0.940657000 | 0.118139000  |
| C | -4.931396000 | 0.160863000  | -0.258382000 |
| C | -3.542811000 | 0.078558000  | -0.321251000 |
| H | -3.144372000 | -3.158146000 | 0.584764000  |

|   |              |              |              |
|---|--------------|--------------|--------------|
| H | -5.619696000 | -3.011468000 | 0.694901000  |
| H | -5.427053000 | 1.090761000  | -0.527371000 |
| C | -7.202564000 | -0.858123000 | 0.198489000  |
| H | -7.570117000 | 0.090747000  | -0.200530000 |
| H | -7.673165000 | -1.668650000 | -0.366645000 |
| C | -0.710066000 | 1.138658000  | 0.877398000  |
| H | -1.699244000 | 1.161007000  | 1.337538000  |
| H | 0.021185000  | 1.301187000  | 1.682784000  |
| C | -0.499940000 | 2.254044000  | -0.148246000 |
| H | -2.160137000 | 4.561340000  | -1.609538000 |
| H | -0.460003000 | 4.061756000  | -1.821298000 |
| N | -1.380440000 | 3.294797000  | -0.130863000 |
| H | -1.987296000 | 3.388772000  | 1.900115000  |
| O | 0.431516000  | 2.178822000  | -0.935710000 |
| C | -1.212348000 | 4.368723000  | -1.097396000 |
| H | -0.883282000 | 5.289684000  | -0.602697000 |
| C | -2.404170000 | 3.465213000  | 0.891410000  |
| H | -2.826842000 | 4.465303000  | 0.782494000  |
| H | -3.218415000 | 2.738406000  | 0.789108000  |
| H | 3.760709000  | -2.997183000 | -0.690868000 |
| H | 2.054833000  | 0.808606000  | 0.411252000  |
| O | 6.837400000  | 0.958217000  | 0.910931000  |
| H | -7.546173000 | -0.941777000 | 1.235253000  |
| O | 5.397050000  | -1.221919000 | -0.131726000 |
| O | 4.510119000  | 0.776964000  | 0.362358000  |
| H | 5.756383000  | 1.073611000  | 0.684071000  |
| O | 7.111788000  | 0.128806000  | -0.139122000 |
| H | 7.589445000  | -0.619158000 | 0.273434000  |

**MI TS(COOH) CH<sub>3</sub>O'**

E = -1239.94646239 Ha

|   |              |              |              |
|---|--------------|--------------|--------------|
| C | 3.021681000  | -1.159065000 | -0.211630000 |
| N | -0.865128000 | -2.367260000 | -0.463945000 |
| C | -1.454981000 | -1.200942000 | -0.058229000 |
| C | -0.517434000 | -0.232437000 | 0.251670000  |
| C | 2.798271000  | -2.499346000 | -0.647059000 |
| C | 1.526862000  | -2.976826000 | -0.760715000 |
| C | 0.431202000  | -2.135104000 | -0.432780000 |
| N | 0.703558000  | -0.826312000 | -0.006375000 |
| C | 1.971246000  | -0.334402000 | 0.091613000  |
| H | -2.968418000 | 0.982494000  | -0.610756000 |
| H | 1.306044000  | -3.980793000 | -1.102744000 |
| C | 4.424399000  | -0.666021000 | -0.104999000 |
| C | -2.915519000 | -1.070204000 | 0.034282000  |
| C | -3.696837000 | -2.173038000 | 0.398336000  |
| C | -5.074485000 | -2.051399000 | 0.505960000  |
| C | -5.718061000 | -0.834241000 | 0.252120000  |
| C | -4.937117000 | 0.254662000  | -0.134622000 |
| C | -3.554441000 | 0.139572000  | -0.250731000 |
| H | -3.203555000 | -3.120646000 | 0.590708000  |
| H | -5.668769000 | -2.915951000 | 0.792328000  |
| H | -5.418958000 | 1.201287000  | -0.367964000 |
| C | -7.214381000 | -0.716816000 | 0.390000000  |
| H | -7.725418000 | -1.506239000 | -0.169814000 |
| H | -7.521058000 | -0.809636000 | 1.437496000  |
| C | -0.663349000 | 1.103834000  | 0.902310000  |
| H | -1.632161000 | 1.120540000  | 1.399057000  |
| H | 0.100706000  | 1.220167000  | 1.682713000  |
| C | -0.431158000 | 2.241790000  | -0.093441000 |
| H | -0.833893000 | 5.191592000  | -0.699792000 |
| H | -2.009538000 | 4.457621000  | -1.816951000 |
| N | -1.385896000 | 3.202557000  | -0.266968000 |
| H | -2.372061000 | 4.321669000  | 1.218718000  |
| O | 0.610937000  | 2.237759000  | -0.734703000 |
| C | -1.111856000 | 4.267227000  | -1.220870000 |
| H | -0.293296000 | 3.958955000  | -1.867096000 |
| C | -2.540249000 | 3.446476000  | 0.578298000  |
| H | -3.411798000 | 3.649350000  | -0.053727000 |
| H | -2.778140000 | 2.592549000  | 1.207782000  |
| H | 3.662311000  | -3.102367000 | -0.902427000 |
| H | 2.074724000  | 0.711219000  | 0.351303000  |
| O | 6.619054000  | 1.308009000  | 0.429924000  |
| H | -7.573020000 | 0.247147000  | 0.020161000  |
| O | 5.359372000  | -1.183448000 | -0.674605000 |
| O | 4.502527000  | 0.354946000  | 0.736428000  |
| H | 5.659332000  | 1.065980000  | 0.757419000  |
| C | 7.540425000  | 0.356643000  | 0.889610000  |
| H | 7.474293000  | 0.205435000  | 1.973048000  |
| H | 7.393181000  | -0.594481000 | 0.364878000  |



H 8.531328000 0.740909000 0.625585000

**MIII**

E = -1050.94525007 Ha

C 4.591648000 -0.689805000 0.167628000  
N 0.848595000 -2.298915000 -0.380593000  
C 0.124890000 -1.194944000 -0.040972000  
C 0.942634000 -0.138521000 0.331629000  
C 4.513146000 -2.058097000 -0.247258000  
C 3.311528000 -2.666549000 -0.461850000  
C 2.114712000 -1.937030000 -0.248691000  
N 2.224883000 -0.613721000 0.176474000  
C 3.437733000 0.006775000 0.360054000  
H -1.528827000 0.849657000 -0.717631000  
H 3.225922000 -3.695331000 -0.791000000  
C 5.931735000 -0.031673000 0.355077000  
H 6.514444000 -0.060232000 -0.571356000  
H 5.821982000 1.014129000 0.651895000  
H 6.516102000 -0.544784000 1.126152000  
C -1.344365000 -1.198009000 -0.074811000  
C -2.048681000 -2.370248000 0.218525000  
C -3.437848000 -2.376664000 0.207235000  
C -4.157342000 -1.222177000 -0.107977000  
C -3.456719000 -0.056667000 -0.422062000  
C -2.065878000 -0.046821000 -0.413712000  
H -1.486903000 -3.266946000 0.460142000  
H -3.974002000 -3.291042000 0.451707000  
H -6.050430000 -2.052564000 0.477117000  
H -4.014316000 0.836582000 -0.690248000  
C -5.669263000 -1.232199000 -0.149246000  
H -6.017484000 -1.419390000 -1.170454000  
C 0.622285000 1.177077000 0.958464000  
H -0.384985000 1.114664000 1.373119000  
H 1.303584000 1.362028000 1.802037000  
C 0.797720000 2.345662000 -0.011788000  
H 0.761564000 4.182928000 -1.659662000  
H 0.210180000 5.327058000 -0.412360000  
N -0.191652000 3.284584000 -0.053241000  
H -1.987813000 2.505467000 0.781393000  
O 1.799114000 2.404519000 -0.710772000  
C -0.040713000 4.411512000 -0.960947000  
H -0.973641000 4.571814000 -1.509227000  
C -1.288626000 3.339535000 0.904734000  
H -0.927915000 3.349467000 1.938445000  
H -1.838070000 4.266769000 0.734961000  
H 5.437387000 -2.606297000 -0.407084000  
H 3.397751000 1.062526000 0.598393000  
O -6.241074000 0.007843000 0.216928000  
H -5.913214000 0.224033000 1.101738000

**MIII radical (C4)**

E = -1050.30703901 Ha

C 4.267392000 -1.420840000 0.005391000  
N 0.279154000 -2.409448000 0.028625000  
C -0.249112000 -1.179077000 -0.018207000  
C 0.757301000 -0.159582000 -0.044338000  
C 3.928483000 -2.804750000 0.049463000  
C 2.621149000 -3.207976000 0.048933000  
C 1.603405000 -2.236232000 0.008701000  
N 1.952878000 -0.891513000 -0.050195000  
C 3.268936000 -0.490612000 -0.042671000  
H -1.728140000 0.716160000 -1.346562000  
H 2.324092000 -4.249034000 0.086591000  
C 5.709836000 -0.990887000 -0.000110000  
H 6.238716000 -1.409016000 -0.862731000  
H 5.796598000 0.096928000 -0.045325000  
H 6.225684000 -1.337590000 0.901414000  
C -1.706393000 -0.996346000 -0.037105000  
C -2.508606000 -1.916282000 0.651692000  
C -3.890081000 -1.787951000 0.647466000  
C -4.509564000 -0.753530000 -0.057796000  
C -3.715279000 0.150778000 -0.762792000  
C -2.329655000 0.031578000 -0.756427000  
H -2.025493000 -2.723936000 1.191895000  
H -4.498590000 -2.499058000 1.201673000  
H -6.444960000 -1.094524000 0.809675000  
H -4.196171000 0.943051000 -1.328812000  
C -6.017023000 -0.631443000 -0.092129000  
H -6.416737000 -1.177638000 -0.953100000

C 0.542544000 1.214125000 0.073770000  
H -0.485483000 1.471718000 0.294983000  
C 1.473094000 2.310115000 -0.187431000  
H 2.634024000 4.400215000 -0.807664000  
H 2.287812000 5.225775000 0.733841000  
N 1.104401000 3.545174000 0.292992000  
H -0.966693000 3.935933000 0.583955000  
O 2.511319000 2.171051000 -0.844102000  
C 1.843864000 4.717232000 -0.130183000  
H 1.180419000 5.423385000 -0.644572000  
C -0.039269000 3.776072000 1.151303000  
H -0.182844000 2.940973000 1.839157000  
H 0.150929000 4.672020000 1.748961000  
H 4.726608000 -3.541070000 0.082950000  
H 3.435493000 0.575004000 -0.120602000  
O -6.464122000 0.698512000 -0.254003000  
H -6.093975000 1.218357000 0.473990000

**MIII TS(C4) HO'**

E = -1126.63791528 Ha

C 3.926641000 -1.875798000 -0.055860000  
N -0.147325000 -2.407459000 -0.254648000  
C -0.512080000 -1.114386000 -0.066643000  
C 0.597714000 -0.282211000 0.085534000  
C 3.442763000 -3.202397000 -0.274403000  
C 2.104995000 -3.467339000 -0.364691000  
C 1.180869000 -2.405908000 -0.231761000  
N 1.682965000 -1.123843000 -0.031612000  
C 3.027244000 -0.856193000 0.055133000  
H -1.631349000 1.178267000 -1.023372000  
H 1.714674000 -4.464550000 -0.529014000  
C 5.405418000 -1.610520000 0.028797000  
H 5.904894000 -1.885667000 -0.905754000  
H 5.607618000 -0.554232000 0.220840000  
H 5.864028000 -2.197417000 0.831353000  
C -1.926413000 -0.716213000 -0.040447000  
C -2.882545000 -1.599937000 0.473448000  
C -4.223706000 -1.243896000 0.510706000  
C -4.644270000 -0.002035000 0.026617000  
C -3.696705000 0.867383000 -0.512287000  
C -2.351124000 0.516848000 -0.548323000  
H -2.551571000 -2.566679000 0.839578000  
H -4.964677000 -1.927763000 0.914149000  
H -4.016490000 1.819715000 -0.929161000  
C -6.105493000 0.384549000 0.090653000  
H -6.330474000 0.843919000 1.059188000  
H -6.320579000 1.138781000 -0.681397000  
C 0.731033000 1.123894000 0.481952000  
H -0.240781000 1.529300000 0.776939000  
H 1.392510000 1.190947000 1.423508000  
C 1.443717000 2.018401000 -0.533426000  
H 2.941446000 4.784130000 -0.729621000  
H 1.344650000 5.014922000 -1.482113000  
N 1.502702000 3.342155000 -0.221040000  
H 1.504844000 4.827298000 1.224741000  
O 1.933011000 1.544121000 -1.547476000  
C 2.085148000 4.266837000 -1.176143000  
H 2.414015000 3.702129000 -2.046462000  
C 0.946665000 3.916924000 0.991913000  
H -0.111160000 4.185927000 0.872502000  
H 1.061995000 3.239485000 1.838589000  
H 4.163885000 -4.008853000 -0.373780000  
H 3.303747000 0.180717000 0.201206000  
O 2.611387000 1.387336000 2.364511000  
H 2.611881000 0.492542000 2.760468000  
O -6.977831000 -0.721460000 -0.007845000  
H -6.763252000 -1.186872000 -0.829402000

**MIII TS(C4) HOO'**

E = -1201.75902996 Ha

C 3.973184000 -1.751738000 -0.168315000  
N -0.079001000 -2.364397000 -0.489479000  
C -0.479160000 -1.082133000 -0.372862000  
C 0.611809000 -0.200349000 -0.245672000  
C 3.520685000 -3.090882000 -0.358433000  
C 2.190397000 -3.378547000 -0.491515000  
C 1.253300000 -2.325660000 -0.437671000  
N 1.722527000 -1.028111000 -0.296421000  
C 3.054081000 -0.743587000 -0.139715000

|   |              |              |              |
|---|--------------|--------------|--------------|
| H | -1.689357000 | 1.113660000  | -1.468668000 |
| H | 1.816473000  | -4.386728000 | -0.622544000 |
| C | 5.440317000  | -1.459897000 | -0.006221000 |
| H | 6.004393000  | -1.792648000 | -0.883529000 |
| H | 5.618336000  | -0.390079000 | 0.124016000  |
| H | 5.848238000  | -1.980872000 | 0.865988000  |
| C | -1.906678000 | -0.730260000 | -0.372619000 |
| C | -2.826764000 | -1.608333000 | 0.210600000  |
| C | -4.182365000 | -1.304268000 | 0.234990000  |
| C | -4.648832000 | -0.116160000 | -0.328153000 |
| C | -3.736811000 | 0.754084000  | -0.926197000 |
| C | -2.381370000 | 0.450286000  | -0.957766000 |
| H | -2.458385000 | -2.534789000 | 0.640205000  |
| H | -4.892246000 | -1.980380000 | 0.698304000  |
| H | -4.091630000 | 1.674710000  | -1.384555000 |
| C | -6.121473000 | 0.212136000  | -0.343697000 |
| H | -6.522270000 | 0.004689000  | -1.348311000 |
| C | 0.640994000  | 1.186970000  | 0.159679000  |
| H | -0.371155000 | 1.572738000  | 0.294455000  |
| H | 1.079040000  | 1.129565000  | 1.354728000  |
| C | 1.545543000  | 2.156788000  | -0.559281000 |
| H | 2.797542000  | 3.986985000  | -1.639349000 |
| H | 2.935700000  | 4.979478000  | -0.162539000 |
| N | 1.500531000  | 3.449269000  | -0.116544000 |
| H | -0.319052000 | 4.272566000  | 0.601876000  |
| O | 2.281675000  | 1.797237000  | -1.469408000 |
| C | 2.240654000  | 4.467561000  | -0.837322000 |
| H | 1.555168000  | 5.211323000  | -1.261156000 |
| C | 0.653581000  | 3.914982000  | 0.966025000  |
| H | 0.493328000  | 3.133961000  | 1.710151000  |
| H | 1.156841000  | 4.747898000  | 1.465224000  |
| H | 4.255617000  | -3.890384000 | -0.390982000 |
| H | 3.311942000  | 0.300109000  | -0.029070000 |
| O | 1.321525000  | 0.799047000  | 2.582581000  |
| O | 0.978385000  | -0.531773000 | 2.557425000  |
| H | 0.039731000  | -0.535014000 | 2.817147000  |
| H | -6.254177000 | 1.288836000  | -0.157993000 |
| O | -6.785609000 | -0.562930000 | 0.632020000  |
| H | -7.736842000 | -0.441554000 | 0.517651000  |

### MIH TS(C4) CH<sub>3</sub>O<sup>+</sup>

E = -1165.93481249 Ha

|   |              |              |              |
|---|--------------|--------------|--------------|
| C | 3.839022000  | -1.835522000 | -0.315756000 |
| N | -0.240560000 | -2.349456000 | -0.437039000 |
| C | -0.598706000 | -1.059497000 | -0.240575000 |
| C | 0.519579000  | -0.221413000 | -0.125181000 |
| C | 3.345025000  | -3.157302000 | -0.533701000 |
| C | 2.003970000  | -3.416053000 | -0.602329000 |
| C | 1.090596000  | -2.349571000 | -0.453185000 |
| N | 1.600791000  | -1.070281000 | -0.271904000 |
| C | 2.945640000  | -0.811625000 | -0.191201000 |
| H | -1.746657000 | 1.234902000  | -1.162827000 |
| H | 1.605245000  | -4.411447000 | -0.756467000 |
| C | 5.319623000  | -1.580299000 | -0.234819000 |
| H | 5.815045000  | -1.857935000 | -1.170775000 |
| H | 5.528921000  | -0.525891000 | -0.041147000 |
| H | 5.775013000  | -2.170312000 | 0.567039000  |
| C | -2.011674000 | -0.661619000 | -0.175111000 |
| C | -2.951143000 | -1.548147000 | 0.364241000  |
| C | -4.291736000 | -1.195723000 | 0.437089000  |
| C | -4.727973000 | 0.044733000  | -0.036434000 |
| C | -3.797328000 | 0.916732000  | -0.600440000 |
| C | -2.452155000 | 0.570652000  | -0.671347000 |
| H | -2.608066000 | -2.513924000 | 0.721702000  |
| H | -5.019914000 | -1.881152000 | 0.860542000  |
| H | -4.130544000 | 1.868255000  | -1.008421000 |
| C | -6.187934000 | 0.427919000  | 0.066702000  |
| H | -6.386095000 | 0.891257000  | 1.039171000  |
| H | -6.426617000 | 1.178146000  | -0.702232000 |
| C | 0.668376000  | 1.171864000  | 0.276592000  |
| H | -0.293102000 | 1.600374000  | 0.570938000  |
| H | 1.330496000  | 1.164247000  | 1.266297000  |
| C | 1.439893000  | 2.074060000  | -0.676330000 |
| H | 2.515028000  | 3.794839000  | -2.074285000 |
| H | 3.091205000  | 4.772176000  | -0.696974000 |
| N | 1.592117000  | 3.366520000  | -0.269795000 |
| H | 0.044026000  | 4.259873000  | 0.877765000  |
| O | 1.900769000  | 1.641807000  | -1.722838000 |
| C | 2.212621000  | 4.320285000  | -1.170342000 |

|   |              |              |              |
|---|--------------|--------------|--------------|
| H | 1.506009000  | 5.117924000  | -1.428276000 |
| C | 1.073364000  | 3.891793000  | 0.981896000  |
| H | 1.116806000  | 3.142976000  | 1.774142000  |
| H | 1.704461000  | 4.730328000  | 1.287962000  |
| H | 4.060077000  | -3.967927000 | -0.642762000 |
| H | 3.229335000  | 0.219384000  | -0.025726000 |
| C | 1.720525000  | -0.297939000 | 2.892752000  |
| H | 1.451174000  | -0.223921000 | 3.956092000  |
| H | 2.479822000  | -1.081200000 | 2.746489000  |
| H | 0.807104000  | -0.636644000 | 2.362612000  |
| O | 2.134084000  | 0.927882000  | 2.400439000  |
| O | -7.059721000 | -0.680571000 | -0.001827000 |
| H | -6.873758000 | -1.144731000 | -0.831013000 |

### MIH TS(C4) CH<sub>3</sub>OO<sup>+</sup>

E = -1241.05433758 Ha

|   |              |              |              |
|---|--------------|--------------|--------------|
| C | 3.983710000  | -1.733025000 | -0.425033000 |
| N | -0.085330000 | -2.290598000 | -0.593605000 |
| C | -0.465352000 | -1.001557000 | -0.470694000 |
| C | 0.640225000  | -0.130940000 | -0.387222000 |
| C | 3.505090000  | -3.068677000 | -0.582088000 |
| C | 2.167248000  | -3.335378000 | -0.671417000 |
| C | 1.246878000  | -2.267916000 | -0.597907000 |
| N | 1.738140000  | -0.971864000 | -0.480640000 |
| C | 3.083702000  | -0.708319000 | -0.379753000 |
| H | -1.686464000 | 1.178135000  | -1.571544000 |
| H | 1.773088000  | -4.338496000 | -0.781142000 |
| C | 5.460716000  | -1.461890000 | -0.327890000 |
| H | 5.979819000  | -1.805281000 | -1.228466000 |
| H | 5.659887000  | -0.394437000 | -0.210000000 |
| H | 5.900124000  | -1.987279000 | 0.526235000  |
| C | -1.887467000 | -0.634381000 | -0.424588000 |
| C | -2.795331000 | -1.496440000 | 0.200887000  |
| C | -4.145574000 | -1.179737000 | 0.255509000  |
| C | -4.623124000 | -0.000842000 | -0.323001000 |
| C | -3.723724000 | 0.845016000  | -0.971165000 |
| C | -2.369081000 | 0.535036000  | -1.023079000 |
| H | -2.421466000 | -2.415932000 | 0.640355000  |
| H | -4.848879000 | -1.845499000 | 0.746874000  |
| H | -6.298683000 | 0.883821000  | 0.692542000  |
| H | -4.088548000 | 1.746835000  | -1.457426000 |
| C | -6.093246000 | 0.346004000  | -0.239145000 |
| H | -6.359931000 | 1.020742000  | -1.066612000 |
| C | 0.676236000  | 1.242612000  | 0.061510000  |
| H | -0.338373000 | 1.621756000  | 0.196457000  |
| H | 1.007381000  | 1.145529000  | 1.305890000  |
| C | 1.597167000  | 2.241770000  | -0.584266000 |
| H | 2.868328000  | 4.120519000  | -1.554273000 |
| H | 2.933673000  | 5.067154000  | -0.042322000 |
| N | 1.522473000  | 3.515791000  | -0.098872000 |
| H | 0.433914000  | 3.131492000  | 1.670240000  |
| O | 2.370142000  | 1.923006000  | -1.482110000 |
| C | 2.273779000  | 4.566357000  | -0.759322000 |
| H | 1.592652000  | 5.312973000  | -1.185146000 |
| C | 0.624680000  | 3.938868000  | 0.962362000  |
| H | 1.102027000  | 4.755498000  | 1.511477000  |
| H | -0.330142000 | 4.307806000  | 0.564548000  |
| H | 4.226239000  | -3.879795000 | -0.629507000 |
| H | 3.360787000  | 0.334111000  | -0.311822000 |
| C | 0.782263000  | -1.381917000 | 2.684773000  |
| H | 1.135551000  | -1.486725000 | 3.715245000  |
| H | 1.635879000  | -1.408030000 | 1.999992000  |
| H | 0.074812000  | -2.176154000 | 2.435185000  |
| O | 0.063181000  | -0.167493000 | 2.534913000  |
| O | 0.943062000  | 0.880730000  | 2.558801000  |
| O | -6.931052000 | -0.790158000 | -0.205726000 |
| H | -6.734085000 | -1.318574000 | -0.992806000 |

### MIH TS(C4) CH<sub>2</sub>CHO<sup>+</sup>

E = -1279.12871223 Ha

|   |              |              |              |
|---|--------------|--------------|--------------|
| C | 3.923606000  | -1.591080000 | -0.652105000 |
| N | -0.136219000 | -2.224804000 | -0.747360000 |
| C | -0.538130000 | -0.952533000 | -0.567077000 |
| C | 0.554726000  | -0.061748000 | -0.475659000 |
| C | 3.468957000  | -2.926755000 | -0.856301000 |
| C | 2.133706000  | -3.217963000 | -0.921543000 |
| C | 1.197454000  | -2.173700000 | -0.780414000 |
| N | 1.663790000  | -0.874016000 | -0.635109000 |
| C | 3.002637000  | -0.588607000 | -0.543947000 |

|   |              |              |              |
|---|--------------|--------------|--------------|
| H | -1.824408000 | 1.254299000  | -1.534786000 |
| H | 1.756533000  | -4.223752000 | -1.062176000 |
| C | 5.396037000  | -1.292612000 | -0.566012000 |
| H | 5.911024000  | -1.599595000 | -1.481935000 |
| H | 5.575271000  | -0.225012000 | -0.420127000 |
| H | 5.856634000  | -1.832442000 | 0.267805000  |
| C | -1.965254000 | -0.615709000 | -0.473537000 |
| C | -2.843161000 | -1.525723000 | 0.126848000  |
| C | -4.197619000 | -1.239040000 | 0.225360000  |
| C | -4.709705000 | -0.042856000 | -0.283962000 |
| C | -3.840766000 | 0.851566000  | -0.908351000 |
| C | -2.482023000 | 0.571960000  | -1.003549000 |
| H | -2.442625000 | -2.458945000 | 0.510518000  |
| H | -4.877598000 | -1.942002000 | 0.697311000  |
| H | -4.233235000 | 1.768414000  | -1.342073000 |
| C | 0.577279000  | 1.292870000  | 0.028285000  |
| H | -0.440735000 | 1.646371000  | 0.203240000  |
| H | 0.963996000  | 1.174503000  | 1.233870000  |
| C | 1.453123000  | 2.333943000  | -0.621624000 |
| H | 2.653381000  | 4.267337000  | -1.574442000 |
| H | 2.742473000  | 5.174063000  | -0.039440000 |
| N | 1.367794000  | 3.590565000  | -0.095878000 |
| H | 0.354841000  | 3.134278000  | 1.701089000  |
| O | 2.199140000  | 2.057675000  | -1.554776000 |
| C | 2.073095000  | 4.676807000  | -0.749955000 |
| H | 1.361552000  | 5.417432000  | -1.134355000 |
| C | 0.495451000  | 3.962259000  | 1.005414000  |
| H | 0.967448000  | 4.780874000  | 1.555950000  |
| H | -0.483365000 | 4.310483000  | 0.649491000  |
| H | 4.204620000  | -3.719948000 | -0.956861000 |
| H | 3.261494000  | 0.454858000  | -0.432669000 |
| C | 0.771320000  | -1.360686000 | 2.453543000  |
| O | 0.131373000  | -0.155511000 | 2.555516000  |
| C | 0.993456000  | 0.906897000  | 2.524425000  |
| C | 2.085059000  | -1.562452000 | 2.446502000  |
| H | 2.463522000  | -2.571425000 | 2.341492000  |
| H | 2.781887000  | -0.740806000 | 2.544833000  |
| H | 0.023544000  | -2.143094000 | 2.366228000  |
| H | -6.377786000 | 0.761133000  | 0.807398000  |
| C | -6.183958000 | 0.270345000  | -0.152308000 |
| H | -6.482133000 | 0.976663000  | -0.941739000 |
| O | -6.998975000 | -0.882519000 | -0.152431000 |
| H | -6.814841000 | -1.367970000 | -0.969721000 |

### MIII radical (O')

E = -1050.27879450 Ha

|   |              |              |              |
|---|--------------|--------------|--------------|
| C | 4.560070000  | -0.695852000 | 0.130719000  |
| N | 0.807844000  | -2.298444000 | -0.373600000 |
| C | 0.090770000  | -1.193268000 | -0.024047000 |
| C | 0.914487000  | -0.138713000 | 0.339790000  |
| C | 4.474267000  | -2.063544000 | -0.284739000 |
| C | 3.269160000  | -2.669900000 | -0.485302000 |
| C | 2.076199000  | -1.938751000 | -0.256728000 |
| N | 2.193767000  | -0.616056000 | 0.168483000  |
| C | 3.409730000  | 0.002355000  | 0.338003000  |
| H | -1.561411000 | 0.851539000  | -0.694814000 |
| H | 3.177982000  | -3.698214000 | -0.814429000 |
| C | 5.903397000  | -0.040154000 | 0.302836000  |
| H | 6.475235000  | -0.069362000 | -0.630331000 |
| H | 5.798909000  | 1.005705000  | 0.601333000  |
| H | 6.495759000  | -0.554617000 | 1.066867000  |
| C | -1.378755000 | -1.191440000 | -0.039230000 |
| C | -2.083601000 | -2.358666000 | 0.274512000  |
| C | -3.472144000 | -2.358700000 | 0.280719000  |
| C | -4.185823000 | -1.200876000 | -0.033867000 |
| C | -3.490478000 | -0.042237000 | -0.369292000 |
| C | -2.099008000 | -0.040545000 | -0.379324000 |
| H | -1.522482000 | -3.256032000 | 0.514924000  |
| H | -4.009328000 | -3.269439000 | 0.538128000  |
| H | -6.104361000 | -1.856730000 | 0.759527000  |
| H | -4.048922000 | 0.851193000  | -0.631989000 |
| C | -5.699439000 | -1.221431000 | -0.048188000 |
| H | -6.065527000 | -1.704790000 | -0.978339000 |
| C | 0.602318000  | 1.175954000  | 0.972603000  |
| H | -0.400122000 | 1.113294000  | 1.398773000  |
| H | 1.293243000  | 1.358916000  | 1.808713000  |
| C | 0.767061000  | 2.346186000  | 0.002555000  |
| H | 0.714048000  | 4.188620000  | -1.638685000 |
| H | 0.174577000  | 5.329048000  | -0.382707000 |

|   |              |              |              |
|---|--------------|--------------|--------------|
| N | -0.221928000 | 3.285550000  | -0.024686000 |
| H | -2.010121000 | 2.505015000  | 0.827477000  |
| O | 1.760102000  | 2.405200000  | -0.708562000 |
| C | -0.081149000 | 4.414745000  | -0.931116000 |
| H | -1.019877000 | 4.575925000  | -1.469179000 |
| C | -1.308843000 | 3.337971000  | 0.945457000  |
| H | -0.936820000 | 3.344415000  | 1.975090000  |
| H | -1.859492000 | 4.266046000  | 0.784708000  |
| H | 5.395600000  | -2.613055000 | -0.456410000 |
| H | 3.374077000  | 1.057868000  | 0.578165000  |
| O | -6.313611000 | -0.000386000 | -0.036486000 |

### MIII TS(OH) HO'

E = -1126.63236783 Ha

|   |              |              |              |
|---|--------------|--------------|--------------|
| C | -4.766167000 | -1.267029000 | 0.031893000  |
| N | -0.773916000 | -2.217793000 | 0.254914000  |
| C | -0.275532000 | -1.009559000 | -0.129737000 |
| C | -1.286507000 | -0.102495000 | -0.414333000 |
| C | -4.423806000 | -2.599893000 | 0.426790000  |
| C | -3.122965000 | -2.993985000 | 0.537752000  |
| C | -2.089135000 | -2.072218000 | 0.235958000  |
| N | -2.454875000 | -0.786280000 | -0.160129000 |
| C | -3.767325000 | -0.383415000 | -0.243654000 |
| H | 1.087775000  | 1.269335000  | 0.430270000  |
| H | -2.836531000 | -3.992224000 | 0.846796000  |
| C | -6.209340000 | -0.848081000 | -0.046220000 |
| H | -6.706441000 | -0.975257000 | 0.920953000  |
| H | -6.302238000 | 0.200846000  | -0.337588000 |
| H | -6.754642000 | -1.454112000 | -0.777451000 |
| C | 1.171347000  | -0.775042000 | -0.236893000 |
| C | 2.021931000  | -1.820699000 | -0.615847000 |
| C | 3.386706000  | -1.605735000 | -0.743061000 |
| C | 3.936777000  | -0.346006000 | -0.487392000 |
| C | 3.096695000  | 0.687460000  | -0.078632000 |
| C | 1.727347000  | 0.475779000  | 0.050716000  |
| H | 1.589188000  | -2.797485000 | -0.807195000 |
| H | 4.044247000  | -2.418786000 | -1.038501000 |
| H | 3.519675000  | 1.659138000  | 0.166925000  |
| C | 5.418046000  | -0.118773000 | -0.660955000 |
| H | 5.666449000  | -0.007216000 | -1.726488000 |
| H | 5.725928000  | 0.810262000  | -0.162442000 |
| C | -1.243946000 | 1.246430000  | -1.056751000 |
| H | -0.288194000 | 1.333365000  | -1.571400000 |
| H | -2.028691000 | 1.311797000  | -1.822461000 |
| C | -1.534107000 | 2.367796000  | -0.058124000 |
| H | -1.291981000 | 5.310428000  | 0.601778000  |
| H | -0.043836000 | 4.644171000  | 1.682057000  |
| N | -0.618604000 | 3.365462000  | 0.134238000  |
| H | 0.304518000  | 4.570023000  | -1.323727000 |
| O | -2.580290000 | 2.322462000  | 0.574663000  |
| C | -0.940794000 | 4.400604000  | 1.104583000  |
| H | -1.721970000 | 4.032784000  | 1.765812000  |
| C | 0.515688000  | 3.682387000  | -0.713485000 |
| H | 1.386419000  | 3.900803000  | -0.085168000 |
| H | 0.779538000  | 2.859615000  | -1.373160000 |
| H | -5.225525000 | -3.296840000 | 0.654439000  |
| H | -3.926310000 | 0.662571000  | -0.474379000 |
| O | 6.036966000  | -1.027431000 | 1.975339000  |
| H | 7.005607000  | -0.983678000 | 2.081717000  |
| O | 6.210166000  | -1.199050000 | -0.232563000 |
| H | 5.924571000  | -1.442258000 | 0.790903000  |

### MIII TS(OH) HOO'

E = -1201.74872777 Ha

|   |              |              |              |
|---|--------------|--------------|--------------|
| C | -5.220747000 | -0.514735000 | 0.093112000  |
| N | -1.515984000 | -2.261180000 | 0.438972000  |
| C | -0.777122000 | -1.216874000 | -0.030230000 |
| C | -1.576233000 | -0.143464000 | -0.397241000 |
| C | -5.164481000 | -1.855479000 | 0.592101000  |
| C | -3.975013000 | -2.503940000 | 0.749036000  |
| C | -2.771686000 | -1.845538000 | 0.391242000  |
| N | -2.860951000 | -0.546091000 | -0.106678000 |
| C | -4.059647000 | 0.115781000  | -0.236511000 |
| H | 1.019610000  | 0.769865000  | 0.376081000  |
| H | -3.903860000 | -3.513282000 | 1.136621000  |
| C | -6.543849000 | 0.190756000  | -0.033492000 |
| H | -7.051832000 | 0.246130000  | 0.934814000  |
| H | -6.415287000 | 1.210018000  | -0.405375000 |
| H | -7.208077000 | -0.341784000 | -0.722362000 |

|   |              |              |              |
|---|--------------|--------------|--------------|
| C | 0.686459000  | -1.294238000 | -0.134410000 |
| C | 1.304270000  | -2.513650000 | -0.428675000 |
| C | 2.685974000  | -2.585631000 | -0.554713000 |
| C | 3.476948000  | -1.447871000 | -0.388996000 |
| C | 2.867572000  | -0.235320000 | -0.066198000 |
| C | 1.486665000  | -0.162644000 | 0.067898000  |
| H | 0.682946000  | -3.393448000 | -0.561878000 |
| H | 3.156167000  | -3.536501000 | -0.796052000 |
| H | 3.482684000  | 0.644675000  | 0.102686000  |
| C | 4.978886000  | -1.531924000 | -0.498336000 |
| H | 5.403697000  | -1.664018000 | 0.527522000  |
| H | 5.305042000  | -2.432423000 | -1.045432000 |
| C | -1.253143000 | 1.111802000  | -1.141932000 |
| H | -0.302520000 | 0.955370000  | -1.649512000 |
| H | -2.009762000 | 1.279647000  | -1.920155000 |
| C | -1.297212000 | 2.343998000  | -0.236897000 |
| H | -1.128586000 | 4.151913000  | 1.445159000  |
| H | -0.419549000 | 5.213227000  | 0.202367000  |
| N | -0.192993000 | 3.139309000  | -0.111945000 |
| H | 1.884480000  | 3.184926000  | -0.327487000 |
| O | -2.328241000 | 2.567530000  | 0.383780000  |
| C | -0.282039000 | 4.288272000  | 0.776203000  |
| H | 0.644021000  | -4.369499000 | 1.353445000  |
| C | 0.988238000  | 3.136129000  | -0.955902000 |
| H | 1.057629000  | 2.238989000  | -1.565597000 |
| H | 0.987109000  | 4.011587000  | -1.617730000 |
| H | -6.093836000 | -2.349266000 | 0.861992000  |
| H | -3.995429000 | 1.151303000  | -0.546939000 |
| O | 5.903357000  | 0.032728000  | 1.798029000  |
| O | 5.597491000  | -0.438050000 | -1.048415000 |
| H | 6.846323000  | -0.123294000 | 1.986010000  |
| O | 5.946544000  | 0.984062000  | 0.795899000  |
| H | 5.772266000  | 0.419874000  | -0.141314000 |

### MIII TS(OH) CH<sub>3</sub>O'

E = -1165.92690354 Ha

|   |              |              |              |
|---|--------------|--------------|--------------|
| C | -4.898654000 | -1.203550000 | 0.151932000  |
| N | -0.924234000 | -2.242705000 | -0.003667000 |
| C | -0.430087000 | -1.018247000 | -0.341810000 |
| C | -1.439407000 | -0.079030000 | -0.491158000 |
| C | -4.559648000 | -2.568417000 | 0.422078000  |
| C | -3.264528000 | -2.995267000 | 0.401713000  |
| C | -2.233989000 | -2.074652000 | 0.084722000  |
| N | -2.598999000 | -0.758371000 | -0.195294000 |
| C | -3.902081000 | -0.323524000 | -0.141391000 |
| H | 0.998714000  | 1.202868000  | 0.285427000  |
| H | -2.981165000 | -4.018555000 | 0.617643000  |
| C | -6.331995000 | -0.751436000 | 0.224123000  |
| H | -6.951177000 | -1.294435000 | -0.497695000 |
| H | -6.750355000 | -0.935334000 | 1.219021000  |
| H | -6.422029000 | 0.316789000  | 0.012976000  |
| C | 1.010907000  | -0.793709000 | -0.522747000 |
| C | 1.821493000  | -1.821698000 | -1.021609000 |
| C | 3.181752000  | -1.615836000 | -1.203177000 |
| C | 3.765723000  | -0.384311000 | -0.893468000 |
| C | 2.967480000  | 0.630436000  | -0.371281000 |
| C | 1.602816000  | 0.427299000  | -0.181168000 |
| H | 1.362202000  | -2.776946000 | -1.255186000 |
| H | 3.810092000  | -2.421413000 | -1.575367000 |
| H | 3.425616000  | 1.568790000  | -0.068345000 |
| C | 5.261704000  | -0.210084000 | -1.004179000 |
| H | 5.611032000  | -0.530721000 | -1.997685000 |
| H | 5.541716000  | 0.844987000  | -0.880019000 |
| C | -1.413023000 | 1.311283000  | -1.031952000 |
| H | -0.484710000 | 1.435425000  | -1.591730000 |
| H | -2.237460000 | 1.447335000  | -1.747286000 |
| C | -1.599358000 | 2.366141000  | 0.059001000  |
| H | -1.395934000 | 5.368650000  | 0.641019000  |
| H | 0.041917000  | 4.735893000  | 1.481774000  |
| N | -0.763406000 | 3.444388000  | 0.042230000  |
| H | 0.579289000  | 4.724984000  | -0.881818000 |
| O | -2.473876000 | 2.216059000  | 0.900257000  |
| C | -0.932105000 | 4.468630000  | 1.061621000  |
| H | -1.573178000 | 4.069424000  | 1.845038000  |
| C | 0.147518000  | 3.738398000  | -1.056977000 |
| H | 0.968923000  | 3.016454000  | -1.118090000 |
| H | -0.370869000 | 3.766864000  | -2.020914000 |
| H | -5.358509000 | -3.264007000 | 0.663390000  |
| H | -4.052379000 | 0.739600000  | -0.283788000 |

|   |             |              |              |
|---|-------------|--------------|--------------|
| O | 5.208390000 | -0.172304000 | 1.843201000  |
| O | 5.958009000 | -1.033263000 | -0.108240000 |
| H | 5.829310000 | -0.592292000 | 0.974548000  |
| C | 4.341206000 | -1.164193000 | 2.317266000  |
| H | 4.853415000 | -2.118158000 | 2.486165000  |
| H | 3.969072000 | -0.792894000 | 3.281543000  |
| H | 3.478425000 | -1.309819000 | 1.655520000  |

### MIV

E = -1050.94414964 Ha

|   |              |              |              |
|---|--------------|--------------|--------------|
| C | 3.988052000  | -0.941121000 | -0.031402000 |
| N | 0.158604000  | -2.357461000 | -0.420897000 |
| C | -0.495885000 | -1.218700000 | -0.054598000 |
| C | 0.387446000  | -0.203272000 | 0.278476000  |
| C | 3.832568000  | -2.301247000 | -0.440642000 |
| C | 2.592878000  | -2.846736000 | -0.607621000 |
| C | 1.444733000  | -2.057802000 | -0.346478000 |
| N | 1.637530000  | -0.738815000 | 0.070894000  |
| C | 2.883647000  | -0.179183000 | 0.203892000  |
| H | -2.077845000 | 0.898101000  | -0.690464000 |
| H | 2.441207000  | -3.871361000 | -0.925608000 |
| C | 5.365159000  | -0.329420000 | 0.094200000  |
| H | 6.076001000  | -1.103606000 | 0.421130000  |
| H | 5.709331000  | 0.030563000  | -0.880616000 |
| C | -1.963687000 | -1.147287000 | -0.025114000 |
| C | -2.714810000 | -2.279227000 | 0.311885000  |
| C | -4.100261000 | -2.217494000 | 0.353087000  |
| C | -4.783399000 | -1.031951000 | 0.057795000  |
| C | -4.032175000 | 0.086786000  | -0.301751000 |
| C | -2.641503000 | 0.031278000  | -0.350793000 |
| H | -2.190173000 | -3.203032000 | 0.534773000  |
| H | -4.669384000 | -3.105469000 | 0.618660000  |
| H | -6.738588000 | -1.807570000 | -0.428922000 |
| H | -4.542580000 | 1.009325000  | -0.568966000 |
| C | -6.288345000 | -0.977760000 | 0.124635000  |
| H | -6.639346000 | -1.048569000 | 1.160001000  |
| H | -6.670985000 | -0.043681000 | -0.294773000 |
| C | 0.155812000  | 1.135937000  | 0.891210000  |
| H | -0.834363000 | 1.127979000  | 1.349749000  |
| H | 0.881456000  | 1.309032000  | 1.699612000  |
| C | 0.337864000  | 2.271373000  | -0.117278000 |
| H | 0.325508000  | 4.095987000  | -1.773357000 |
| H | -0.131603000 | 5.292516000  | -0.536229000 |
| N | -0.583918000 | 3.277498000  | -0.101566000 |
| H | -2.393781000 | 2.634530000  | 0.816863000  |
| O | 1.282401000  | 2.244944000  | -0.891975000 |
| C | -0.436958000 | 4.372270000  | -1.047685000 |
| H | -1.386918000 | 4.551360000  | -1.560570000 |
| C | -1.619487000 | 3.403894000  | 0.915264000  |
| H | -1.204284000 | 3.359458000  | 1.926949000  |
| H | -2.094173000 | 4.378926000  | 0.793989000  |
| H | 4.721110000  | -2.898028000 | -0.628227000 |
| H | 2.924957000  | 0.876635000  | 0.441265000  |
| O | 5.397345000  | 0.795458000  | 0.944973000  |
| H | 5.101090000  | 0.503110000  | 1.819252000  |

### MIV radical (C4)

E = -1050.30520559 Ha

|   |              |              |              |
|---|--------------|--------------|--------------|
| C | 3.595576000  | -1.627943000 | -0.025487000 |
| N | -0.435096000 | -2.372064000 | 0.011013000  |
| C | -0.890566000 | -1.112829000 | -0.044936000 |
| C | 0.173851000  | -0.154887000 | -0.081191000 |
| C | 3.181247000  | -2.988183000 | 0.042295000  |
| C | 1.851833000  | -3.310000000 | 0.039013000  |
| C | 0.895885000  | -2.277525000 | -0.014975000 |
| N | 1.325384000  | -0.954641000 | -0.088143000 |
| C | 2.663180000  | -0.633280000 | -0.094825000 |
| H | -2.254235000 | 0.848053000  | -1.398182000 |
| H | 1.489902000  | -4.329519000 | 0.094193000  |
| C | 5.069729000  | -1.287000000 | -0.049401000 |
| H | 5.603955000  | -1.966862000 | 0.632777000  |
| H | 5.475140000  | -1.458484000 | -1.051987000 |
| C | -2.333212000 | -0.840150000 | -0.060713000 |
| C | -3.191926000 | -1.697762000 | 0.641554000  |
| C | -4.561522000 | -1.484663000 | 0.634758000  |
| C | -5.125095000 | -0.419234000 | -0.077376000 |
| C | -4.270231000 | 0.415792000  | -0.796259000 |
| C | -2.893496000 | 0.211442000  | -0.794091000 |
| H | -2.761240000 | -2.531862000 | 1.186173000  |

|   |              |              |              |
|---|--------------|--------------|--------------|
| H | -5.212198000 | -2.156533000 | 1.189547000  |
| H | -7.159325000 | -1.116743000 | -0.261740000 |
| H | -4.688299000 | 1.231304000  | -1.380902000 |
| C | -6.614278000 | -0.189299000 | -0.061017000 |
| H | -6.943903000 | 0.177183000  | 0.917420000  |
| H | -6.910452000 | 0.548403000  | -0.811082000 |
| C | 0.036249000  | 1.228592000  | 0.037074000  |
| H | -0.975406000 | 1.543542000  | 0.259841000  |
| C | 1.030207000  | 2.267526000  | -0.224031000 |
| H | 2.336793000  | 4.276790000  | -0.816434000 |
| H | 2.006229000  | 5.139712000  | 0.708231000  |
| N | 0.742487000  | 3.520845000  | 0.264866000  |
| H | -1.301306000 | 4.043132000  | 0.544902000  |
| O | 2.053295000  | 2.065224000  | -0.886233000 |
| C | 1.552275000  | 4.645522000  | -0.158739000 |
| H | 0.939141000  | 5.380743000  | -0.694738000 |
| C | -0.389565000 | 3.821489000  | 1.116888000  |
| H | -0.591479000 | 2.994627000  | 1.800029000  |
| H | -0.145856000 | 4.700901000  | 1.719692000  |
| H | 3.933531000  | -3.770516000 | 0.098156000  |
| H | 2.908328000  | 0.415092000  | -0.205173000 |
| O | 5.341659000  | 0.061541000  | 0.243962000  |
| H | 4.980778000  | 0.252271000  | 1.122054000  |

#### MIV TS(C4) HO\*

E = -1126.63799190 Ha

|   |              |              |              |
|---|--------------|--------------|--------------|
| C | 3.456997000  | -1.727629000 | -0.024899000 |
| N | -0.571567000 | -2.475194000 | -0.252561000 |
| C | -1.008292000 | -1.203417000 | -0.067299000 |
| C | 0.054155000  | -0.314166000 | 0.103879000  |
| C | 3.056666000  | -3.075237000 | -0.269016000 |
| C | 1.734701000  | -3.412206000 | -0.353623000 |
| C | 0.753372000  | -2.403861000 | -0.209235000 |
| N | 1.183427000  | -1.097471000 | 0.006210000  |
| C | 2.508301000  | -0.759334000 | 0.114754000  |
| H | -2.246317000 | 1.028997000  | -1.034309000 |
| H | 1.398683000  | -4.425881000 | -0.536063000 |
| C | 4.922510000  | -1.362626000 | 0.057773000  |
| H | 5.342845000  | -1.701357000 | 1.010789000  |
| H | 5.468422000  | -1.892579000 | -0.737776000 |
| C | -2.442423000 | -0.882687000 | -0.061057000 |
| C | -3.355656000 | -1.817513000 | 0.442074000  |
| C | -4.712841000 | -1.533540000 | 0.462708000  |
| C | -5.205799000 | -0.315572000 | -0.020266000 |
| C | -4.294939000 | 0.601807000  | -0.543205000 |
| C | -2.931147000 | 0.323752000  | -0.570731000 |
| H | -2.978493000 | -2.766365000 | 0.810276000  |
| H | -5.409327000 | -2.268483000 | 0.859479000  |
| H | -6.925140000 | 0.871336000  | -0.566174000 |
| H | -4.658888000 | 1.540841000  | -0.952440000 |
| C | -6.681617000 | -0.013506000 | 0.027435000  |
| H | -7.269485000 | -0.852952000 | -0.356240000 |
| H | -7.011197000 | 0.172393000  | 1.055601000  |
| C | 0.105640000  | 1.100374000  | 0.486580000  |
| H | -0.893817000 | 1.460689000  | 0.742794000  |
| H | 0.728936000  | 1.215651000  | 1.457051000  |
| C | 0.823064000  | 2.019243000  | -0.502183000 |
| H | 2.163398000  | 4.835441000  | -0.681401000 |
| H | 0.593689000  | 5.016811000  | -1.502502000 |
| N | 0.744125000  | 3.350504000  | -0.237163000 |
| H | 0.554507000  | 4.867265000  | 1.162817000  |
| O | 1.435660000  | 1.559007000  | -1.455890000 |
| C | 1.343218000  | 4.292618000  | -1.164489000 |
| H | 1.728028000  | 3.739223000  | -2.018920000 |
| C | 0.083983000  | 3.908530000  | 0.931283000  |
| H | -0.984845000 | 4.085399000  | 0.754085000  |
| H | 0.212526000  | 3.265081000  | 1.802277000  |
| H | 3.821639000  | -3.836997000 | -0.393871000 |
| H | 2.738657000  | 0.282681000  | 0.296393000  |
| O | 1.903813000  | 1.581875000  | 2.363042000  |
| H | 2.150732000  | 0.683028000  | 2.660246000  |
| O | 5.151793000  | 0.025166000  | 0.010045000  |
| H | 4.794079000  | 0.356322000  | -0.828023000 |

#### MIV TS(C4) HOO\*

E = -1201.76202189 Ha

|   |              |              |              |
|---|--------------|--------------|--------------|
| C | 3.581118000  | -1.185750000 | -0.400668000 |
| N | -0.349938000 | -2.343646000 | -0.515561000 |
| C | -0.916519000 | -1.131521000 | -0.339251000 |

|   |              |              |              |
|---|--------------|--------------|--------------|
| C | 0.048119000  | -0.110339000 | -0.250212000 |
| C | 3.316495000  | -2.573719000 | -0.591689000 |
| C | 2.032535000  | -3.037580000 | -0.664903000 |
| C | 0.964149000  | -2.122625000 | -0.540587000 |
| N | 1.256748000  | -0.773507000 | -0.393706000 |
| C | 2.541174000  | -0.310702000 | -0.293332000 |
| H | -2.474583000 | 0.913441000  | -1.275816000 |
| H | 1.791048000  | -4.085647000 | -0.794415000 |
| C | 5.007880000  | -0.707368000 | -0.300759000 |
| H | 5.513630000  | -0.820885000 | -1.264575000 |
| H | 5.025520000  | 0.361171000  | -0.043393000 |
| C | -2.375893000 | -0.981584000 | -0.256048000 |
| C | -3.137027000 | -2.008310000 | 0.317636000  |
| C | -4.515947000 | -1.893957000 | 0.411334000  |
| C | -5.182801000 | -0.760180000 | -0.067382000 |
| C | -4.423293000 | 0.247863000  | -0.661376000 |
| C | -3.039203000 | 0.141260000  | -0.760986000 |
| H | -2.625009000 | -2.894815000 | 0.678581000  |
| H | -5.092336000 | -2.699017000 | 0.861002000  |
| H | -4.923700000 | 1.122316000  | -1.069479000 |
| C | -6.679584000 | -0.639937000 | 0.060254000  |
| H | -7.067808000 | 0.168025000  | -0.565084000 |
| H | -7.177216000 | -1.568558000 | -0.234907000 |
| C | -0.076446000 | 1.264346000  | 0.178900000  |
| H | -1.114447000 | 1.510193000  | 0.409340000  |
| H | 0.488998000  | 1.262797000  | 1.318181000  |
| C | 0.630375000  | 2.346565000  | -0.601668000 |
| H | 1.533059000  | 4.325072000  | -1.764976000 |
| H | 1.654171000  | 5.330711000  | -0.295853000 |
| N | 0.444060000  | 3.622104000  | -0.149154000 |
| H | -1.415285000 | 4.161911000  | 0.723449000  |
| O | 1.338700000  | 2.083758000  | -1.565080000 |
| C | 0.982270000  | 4.728947000  | -0.917715000 |
| H | 0.172036000  | 5.372778000  | -1.280121000 |
| C | -0.370293000 | 3.969198000  | 1.001061000  |
| H | -0.338492000 | 3.186649000  | 1.760397000  |
| H | 0.036208000  | 4.880013000  | 1.449249000  |
| H | 4.159731000  | -3.254169000 | -0.658582000 |
| H | 2.661794000  | 0.754989000  | -0.154624000 |
| O | 0.979144000  | 0.969490000  | 2.483634000  |
| O | 0.809262000  | -0.395472000 | 2.495473000  |
| H | -0.058984000 | -0.517076000 | 2.918803000  |
| H | -6.969163000 | -0.429385000 | 1.095771000  |
| O | 5.762996000  | -1.481809000 | 0.609777000  |
| H | 5.321260000  | -1.430552000 | 1.469913000  |

#### MIV TS(C4) CH<sub>3</sub>O\*

E = -1165.93471432 Ha

|   |              |              |              |
|---|--------------|--------------|--------------|
| C | 3.382952000  | -1.709691000 | -0.241697000 |
| N | -0.656887000 | -2.413444000 | -0.417421000 |
| C | -1.078983000 | -1.138982000 | -0.238266000 |
| C | -0.002735000 | -0.251624000 | -0.096034000 |
| C | 2.964668000  | -3.051810000 | -0.478470000 |
| C | 1.637316000  | -3.375280000 | -0.545684000 |
| C | 0.671873000  | -2.354144000 | -0.397951000 |
| N | 1.118340000  | -1.051960000 | -0.202994000 |
| C | 2.445577000  | -0.730665000 | -0.094808000 |
| H | -2.313098000 | 1.095765000  | -1.204327000 |
| H | 1.287395000  | -4.386259000 | -0.715941000 |
| C | 4.851580000  | -1.354960000 | -0.166673000 |
| H | 5.401109000  | -1.950436000 | -0.911901000 |
| H | 5.256421000  | -1.619286000 | 0.815782000  |
| C | -2.509877000 | -0.806208000 | -0.212954000 |
| C | -3.421901000 | -1.730534000 | 0.311455000  |
| C | -4.776679000 | -1.437089000 | 0.348257000  |
| C | -5.267794000 | -0.220412000 | -0.139802000 |
| C | -4.358059000 | 0.686009000  | -0.683878000 |
| C | -2.996692000 | 0.399212000  | -0.726776000 |
| H | -3.046124000 | -2.678714000 | 0.682839000  |
| H | -5.472549000 | -2.163374000 | 0.761593000  |
| H | -7.339369000 | -0.747361000 | -0.440773000 |
| H | -4.721379000 | 1.623636000  | -1.096726000 |
| C | -6.740641000 | 0.092296000  | -0.074827000 |
| H | -7.054092000 | 0.291714000  | 0.955827000  |
| H | -6.986537000 | 0.972223000  | -0.674653000 |
| C | 0.075270000  | 1.152456000  | 0.289271000  |
| H | -0.914610000 | 1.551138000  | 0.524086000  |
| H | 0.679766000  | 1.184777000  | 1.314662000  |
| C | 0.870944000  | 2.068155000  | -0.630777000 |

|   |              |              |              |
|---|--------------|--------------|--------------|
| H | 1.940066000  | 3.814390000  | -2.003915000 |
| H | 2.431740000  | 4.802059000  | -0.602113000 |
| N | 0.933986000  | 3.373493000  | -0.247040000 |
| H | -0.712411000 | 4.218155000  | 0.795156000  |
| O | 1.427065000  | 1.636735000  | -1.631993000 |
| C | 1.584688000  | 4.335570000  | -1.117079000 |
| H | 0.878047000  | 5.120410000  | -1.410522000 |
| C | 0.323676000  | 3.896528000  | 0.964124000  |
| H | 0.353505000  | 3.163619000  | 1.771704000  |
| H | 0.901221000  | 4.765891000  | 1.288936000  |
| H | 3.719334000  | -3.823119000 | -0.607271000 |
| H | 2.692091000  | 0.303339000  | 0.103891000  |
| C | 1.055248000  | -0.248482000 | 2.970955000  |
| H | 0.734303000  | -0.194613000 | 4.021126000  |
| H | 1.866747000  | -0.983233000 | 2.859138000  |
| H | 0.187685000  | -0.637931000 | 2.400369000  |
| O | 1.414377000  | 1.002865000  | 2.501333000  |
| O | 5.093857000  | 0.023199000  | -0.320985000 |
| H | 4.717689000  | 0.296110000  | -1.171925000 |

#### MIV TS(C4) CH<sub>2</sub>OO<sup>•</sup>

E = -1241.05036994 Ha

|   |              |              |              |
|---|--------------|--------------|--------------|
| C | 3.645485000  | -1.217818000 | -0.608699000 |
| N | -0.309466000 | -2.307120000 | -0.689290000 |
| C | -0.856092000 | -1.082085000 | -0.531320000 |
| C | 0.124005000  | -0.073184000 | -0.448714000 |
| C | 3.349140000  | -2.599791000 | -0.793089000 |
| C | 2.055530000  | -3.041777000 | -0.849045000 |
| C | 1.005834000  | -2.108107000 | -0.718509000 |
| N | 1.323372000  | -0.756646000 | -0.580237000 |
| C | 2.621437000  | -0.320366000 | -0.504744000 |
| H | -2.380940000 | 0.925612000  | -1.580099000 |
| H | 1.792829000  | -4.084067000 | -0.983924000 |
| C | 5.074869000  | -0.753859000 | -0.468288000 |
| H | 5.715562000  | -1.340349000 | -1.142965000 |
| H | 5.161622000  | 0.295916000  | -0.757762000 |
| C | -2.312728000 | -0.908248000 | -0.453036000 |
| C | -3.085993000 | -1.887044000 | 0.182124000  |
| C | -4.463480000 | -1.750102000 | 0.264585000  |
| C | -5.114599000 | -0.641054000 | -0.287448000 |
| C | -4.341700000 | 0.319220000  | -0.940427000 |
| C | -2.958910000 | 0.189989000  | -1.027424000 |
| H | -2.586981000 | -2.754017000 | 0.603712000  |
| H | -5.050517000 | -2.516167000 | 0.765488000  |
| H | -6.894771000 | -0.201042000 | 0.847016000  |
| H | -4.830057000 | 1.173944000  | -1.401411000 |
| C | -6.609691000 | -0.493199000 | -0.169728000 |
| H | -6.988442000 | 0.270089000  | -0.854233000 |
| H | -7.119176000 | -1.435219000 | -0.393564000 |
| C | -0.018084000 | 1.284361000  | 0.027099000  |
| H | -1.072860000 | 1.522447000  | 0.175394000  |
| H | 0.331692000  | 1.208665000  | 1.269910000  |
| C | 0.757639000  | 2.407534000  | -0.605535000 |
| H | 1.767994000  | 4.452842000  | -1.545856000 |
| H | 1.730703000  | 5.364611000  | -0.011929000 |
| N | 0.523453000  | 3.651132000  | -0.094989000 |
| H | -0.494271000 | 3.093584000  | 1.670465000  |
| O | 1.555377000  | 2.207715000  | -1.516432000 |
| C | 1.130836000  | 4.802255000  | -0.735880000 |
| H | 0.356952000  | 5.467014000  | -1.138039000 |
| C | -0.409450000 | 3.935080000  | 0.982161000  |
| H | -0.030397000 | 4.790004000  | 1.549337000  |
| H | -1.405441000 | 4.194027000  | 0.598974000  |
| H | 4.170124000  | -3.304543000 | -0.900870000 |
| H | 2.765318000  | 0.746455000  | -0.404542000 |
| C | 0.506555000  | -1.346238000 | 2.594823000  |
| H | 0.876275000  | -1.417175000 | 3.622354000  |
| H | 1.351446000  | -1.221095000 | 1.910039000  |
| H | -0.068390000 | -2.235909000 | 2.326938000  |
| O | -0.395137000 | -0.256825000 | 2.472966000  |
| O | 0.310131000  | 0.915090000  | 2.514692000  |
| O | 5.542752000  | -0.824105000 | 0.866490000  |
| H | 5.431593000  | -1.735589000 | 1.172005000  |

#### MIV TS(C4) CH<sub>2</sub>CHOO<sup>•</sup>

E = -1279.12754119 Ha

|   |              |              |              |
|---|--------------|--------------|--------------|
| C | 3.491797000  | -1.411199000 | -0.677884000 |
| N | -0.511991000 | -2.286663000 | -0.795485000 |
| C | -0.992560000 | -1.044589000 | -0.595205000 |

|   |              |              |              |
|---|--------------|--------------|--------------|
| C | 0.043252000  | -0.089115000 | -0.492060000 |
| C | 3.128763000  | -2.767488000 | -0.903951000 |
| C | 1.812674000  | -3.136707000 | -0.983575000 |
| C | 0.815499000  | -2.152909000 | -0.831111000 |
| N | 1.201157000  | -0.827321000 | -0.666072000 |
| C | 2.516721000  | -0.460847000 | -0.564652000 |
| H | -2.413195000 | 1.093781000  | -1.529285000 |
| H | 1.496521000  | -4.161894000 | -1.133846000 |
| C | -2.436494000 | -0.795616000 | -0.495116000 |
| C | -3.258121000 | -1.762569000 | 0.096602000  |
| C | -4.625325000 | -1.555014000 | 0.200219000  |
| C | -5.218329000 | -0.384881000 | -0.287337000 |
| C | -4.398585000 | 0.563885000  | -0.899129000 |
| C | -3.025851000 | 0.364357000  | -1.006785000 |
| H | -2.804406000 | -2.676834000 | 0.466350000  |
| H | -5.250055000 | -2.313042000 | 0.666476000  |
| H | -4.842788000 | 1.466069000  | -1.311708000 |
| C | -0.009725000 | 1.260924000  | 0.018769000  |
| H | -1.044550000 | 1.556275000  | 0.203146000  |
| H | 0.397222000  | 1.158890000  | 1.217592000  |
| C | 0.802412000  | 2.346357000  | -0.644261000 |
| H | 1.921981000  | 4.329538000  | -1.591531000 |
| H | 1.983179000  | 5.237521000  | -0.056182000 |
| N | 0.683810000  | 3.592875000  | -0.101268000 |
| H | -0.292085000 | 3.076734000  | 1.699902000  |
| O | 1.526987000  | 2.107823000  | -1.603079000 |
| C | 1.330876000  | 4.711340000  | -0.761471000 |
| H | 0.582361000  | 5.418796000  | -1.138406000 |
| C | -0.178578000 | 3.922005000  | 1.020459000  |
| H | 0.283861000  | 4.738588000  | 1.582321000  |
| H | -1.169768000 | 4.256670000  | 0.686339000  |
| H | 3.911477000  | -3.515136000 | -1.001070000 |
| H | 2.729960000  | 0.590868000  | -0.433989000 |
| C | 0.444367000  | -1.402780000 | 2.406749000  |
| O | -0.301747000 | -0.263346000 | 2.519111000  |
| O | 0.463255000  | 0.873046000  | 2.506424000  |
| C | 1.771115000  | -1.485487000 | 2.427821000  |
| H | 2.243749000  | -2.452527000 | 2.311459000  |
| H | 2.381898000  | -0.603212000 | 2.567156000  |
| H | -0.226395000 | -2.248065000 | 2.284619000  |
| C | 4.945214000  | -1.003752000 | -0.573928000 |
| H | 5.522475000  | -1.835032000 | -0.141572000 |
| H | 5.355669000  | -0.811254000 | -1.570236000 |
| H | -7.264057000 | -1.066208000 | -0.391242000 |
| C | -6.701675000 | -0.160511000 | -0.145594000 |
| H | -6.958514000 | 0.114841000  | 0.883340000  |
| H | -7.046242000 | 0.643327000  | -0.801127000 |
| O | 5.131904000  | 0.190847000  | 0.149746000  |
| H | 4.782996000  | 0.049697000  | 1.042292000  |

#### MIV radical (O<sup>•</sup>)

E = -1050.27770530 Ha

|   |              |              |              |
|---|--------------|--------------|--------------|
| C | 4.005991000  | -0.952927000 | 0.036840000  |
| N | 0.183991000  | -2.358763000 | -0.400690000 |
| C | -0.472249000 | -1.219032000 | -0.039558000 |
| C | 0.409551000  | -0.207063000 | 0.307640000  |
| C | 3.857567000  | -2.310548000 | -0.380648000 |
| C | 2.618740000  | -2.854339000 | -0.559335000 |
| C | 1.469616000  | -2.063391000 | -0.308022000 |
| N | 1.660318000  | -0.745499000 | 0.114914000  |
| C | 2.904888000  | -0.188724000 | 0.266239000  |
| H | -2.040451000 | 0.905318000  | -0.686176000 |
| H | 2.468495000  | -3.876717000 | -0.884955000 |
| C | 5.385290000  | -0.353585000 | 0.186167000  |
| H | 6.049551000  | -1.022587000 | 0.764467000  |
| H | 5.885916000  | -0.270733000 | -0.799081000 |
| C | -1.940089000 | -1.143622000 | -0.028846000 |
| C | -2.698471000 | -2.274995000 | 0.293446000  |
| C | -4.084162000 | -2.209654000 | 0.317155000  |
| C | -4.760244000 | -1.020948000 | 0.018419000  |
| C | -4.001485000 | 0.097327000  | -0.326447000 |
| C | -2.610480000 | 0.038294000  | -0.357880000 |
| H | -2.179247000 | -3.201122000 | 0.519322000  |
| H | -4.659023000 | -3.097166000 | 0.571641000  |
| H | -6.711169000 | -1.788464000 | -0.497374000 |
| H | -4.505954000 | 1.022490000  | -0.595793000 |
| C | -6.265759000 | -0.962881000 | 0.066330000  |
| H | -6.630092000 | -1.038226000 | 1.096746000  |
| H | -6.640447000 | -0.025497000 | -0.352886000 |

|   |              |              |              |
|---|--------------|--------------|--------------|
| C | 0.175773000  | 1.132198000  | 0.919174000  |
| H | -0.820548000 | 1.128406000  | 1.364160000  |
| H | 0.891146000  | 1.300667000  | 1.737542000  |
| C | 0.376385000  | 2.267139000  | -0.086241000 |
| H | 0.395102000  | 4.097236000  | -1.736609000 |
| H | -0.063840000 | 5.294020000  | -0.500325000 |
| N | -0.535974000 | 3.281649000  | -0.075470000 |
| H | -2.361662000 | 2.652171000  | 0.820449000  |
| O | 1.326893000  | 2.233530000  | -0.853623000 |
| C | -0.371727000 | 4.377650000  | -1.017165000 |
| H | -1.315463000 | 4.565747000  | -1.538290000 |
| C | -1.580536000 | 3.412921000  | 0.931517000  |
| H | -1.176097000 | 3.358055000  | 1.946956000  |
| H | -2.043827000 | 4.393552000  | 0.811322000  |
| H | 4.746970000  | -2.907139000 | -0.566753000 |
| H | 2.948844000  | 0.862197000  | 0.521629000  |
| O | 5.434590000  | 0.894365000  | 0.741125000  |

**MIV TS(OH) HO<sup>•</sup>**

E = -1126.63321495 Ha

|   |              |              |              |
|---|--------------|--------------|--------------|
| C | 3.702577000  | -0.171929000 | -0.324226000 |
| N | 0.115863000  | -2.143234000 | -0.596204000 |
| C | -0.684419000 | -1.129847000 | -0.155775000 |
| C | 0.049944000  | -0.004420000 | 0.183024000  |
| C | 3.735139000  | -1.526521000 | -0.784573000 |
| C | 2.583967000  | -2.249392000 | -0.910905000 |
| C | 1.344543000  | -1.656811000 | -0.560942000 |
| N | 1.356195000  | -0.337817000 | -0.098023000 |
| C | 2.507915000  | 0.398798000  | -0.002602000 |
| H | -2.588366000 | 0.740945000  | -0.650497000 |
| H | 2.570602000  | -3.269143000 | -1.277102000 |
| C | 4.974018000  | 0.625384000  | -0.180685000 |
| H | 5.669826000  | 0.395128000  | -0.995806000 |
| H | 4.745368000  | 1.697814000  | -0.226209000 |
| C | -2.143208000 | -1.282587000 | -0.063941000 |
| C | -2.701257000 | -2.524124000 | 0.260825000  |
| C | -4.077394000 | -2.671973000 | 0.359897000  |
| C | -4.941554000 | -1.593796000 | 0.136542000  |
| C | -4.382044000 | -0.364538000 | -0.212311000 |
| C | -3.002352000 | -0.209649000 | -0.319345000 |
| H | -2.035872000 | -3.365379000 | 0.427873000  |
| H | -4.495842000 | -3.642930000 | 0.614685000  |
| H | -6.970457000 | -0.908685000 | -0.143409000 |
| H | -5.035474000 | 0.478451000  | -0.425348000 |
| C | -6.433066000 | -1.766166000 | 0.269849000  |
| H | -6.775304000 | -2.665082000 | -0.251849000 |
| H | -6.724722000 | -1.868414000 | 1.320995000  |
| C | -0.348005000 | 1.252495000  | 0.881253000  |
| H | -1.308215000 | 1.074670000  | 1.367747000  |
| H | 0.375840000  | 1.481131000  | 1.677395000  |
| C | -0.364862000 | 2.460493000  | -0.055340000 |
| H | -1.267617000 | 5.380454000  | -0.283012000 |
| H | -2.446622000 | 4.551153000  | -1.330263000 |
| N | -1.440553000 | 3.296286000  | 0.012162000  |
| H | -3.069473000 | 2.302574000  | 0.954160000  |
| O | 0.569424000  | 2.639806000  | -0.824210000 |
| C | -1.465818000 | 4.465392000  | -0.853444000 |
| H | -0.696963000 | 4.344968000  | -1.613981000 |
| C | -2.462277000 | 3.209047000  | 1.048255000  |
| H | -2.029288000 | 3.242617000  | 2.053416000  |
| H | -3.124073000 | 4.069890000  | 0.941509000  |
| H | 4.694341000  | -1.963288000 | -1.043735000 |
| H | 2.386517000  | 1.437350000  | 0.281320000  |
| O | 6.400254000  | -1.631627000 | 0.834045000  |
| O | 5.600270000  | 0.439589000  | 1.073533000  |
| H | 6.303352000  | -0.370313000 | 1.016349000  |
| H | 5.691239000  | -1.991830000 | 1.399940000  |

**MIV TS(OH) HOO<sup>•</sup>**

E = -1201.75980285 Ha

|   |              |              |              |
|---|--------------|--------------|--------------|
| C | 3.412908000  | -1.703633000 | 0.136039000  |
| N | -0.558617000 | -2.531475000 | -0.439335000 |
| C | -1.057087000 | -1.324840000 | -0.047715000 |
| C | -0.049558000 | -0.461351000 | 0.353482000  |
| C | 3.083761000  | -3.004003000 | -0.355314000 |
| C | 1.785685000  | -3.358895000 | -0.578692000 |
| C | 0.753642000  | -2.424644000 | -0.310451000 |
| N | 1.117818000  | -1.164896000 | 0.169287000  |
| C | 2.424362000  | -0.801601000 | 0.378893000  |

|   |              |              |              |
|---|--------------|--------------|--------------|
| H | -2.308002000 | 1.017793000  | -0.643335000 |
| H | 1.500346000  | -4.334121000 | -0.954593000 |
| C | 4.855694000  | -1.315548000 | 0.350255000  |
| H | 5.347394000  | -2.066100000 | 0.998606000  |
| H | 5.412592000  | -1.351468000 | -0.601641000 |
| C | -2.500275000 | -1.045714000 | -0.055514000 |
| C | -3.412740000 | -2.071486000 | 0.216955000  |
| C | -4.776377000 | -1.815899000 | 0.226957000  |
| C | -5.277501000 | -0.535727000 | -0.036439000 |
| C | -4.366357000 | 0.477767000  | -0.332965000 |
| C | -2.996503000 | 0.227693000  | -0.349904000 |
| H | -3.029844000 | -3.067691000 | 0.415042000  |
| H | -5.471986000 | -2.623670000 | 0.442310000  |
| H | -7.141264000 | -0.297794000 | 1.025596000  |
| H | -4.734420000 | 1.471857000  | -0.576507000 |
| C | -6.760914000 | -0.270691000 | -0.001470000 |
| H | -6.998997000 | 0.710710000  | -0.419804000 |
| H | -7.310664000 | -1.025397000 | -0.572103000 |
| C | -0.108248000 | 0.886021000  | 0.986774000  |
| H | -1.094449000 | 1.002859000  | 1.439301000  |
| H | 0.629501000  | 0.958475000  | 1.799688000  |
| C | 0.214392000  | 1.999050000  | -0.006471000 |
| H | 0.442886000  | 3.833646000  | -1.651406000 |
| H | 0.189163000  | 5.066219000  | -0.390086000 |
| N | -0.523397000 | 3.131958000  | 0.047696000  |
| H | -1.147312000 | 3.201051000  | 2.072029000  |
| O | 1.121740000  | 1.837227000  | -0.823990000 |
| C | -0.252038000 | 4.203675000  | -0.900744000 |
| H | -1.184132000 | 4.513008000  | -1.382546000 |
| C | -1.536815000 | 3.382408000  | 1.067003000  |
| H | -1.823867000 | 4.432987000  | 1.004963000  |
| H | -2.432453000 | 2.769712000  | 0.914267000  |
| H | 3.885136000  | -3.709875000 | -0.557287000 |
| H | 2.615107000  | 0.211014000  | 0.713100000  |
| O | 4.607420000  | 1.430923000  | -0.715085000 |
| O | 5.037916000  | -0.108982000 | 0.988198000  |
| H | 5.018919000  | 0.940773000  | 0.110889000  |
| O | 3.720996000  | 2.335113000  | -0.139144000 |
| H | 2.864949000  | 2.087163000  | -0.553922000 |

**MIV TS(OH) CH<sub>3</sub>O<sup>•</sup>**

E = -1165.92566541 Ha

|   |              |              |              |
|---|--------------|--------------|--------------|
| C | 3.426965000  | 0.221432000  | -0.478360000 |
| N | -0.007618000 | -2.005196000 | -0.742462000 |
| C | -0.868684000 | -1.074758000 | -0.238476000 |
| C | -0.211343000 | 0.088948000  | 0.128447000  |
| C | 3.548134000  | -1.106217000 | -0.998084000 |
| C | 2.451730000  | -1.909825000 | -1.124445000 |
| C | 1.181561000  | -1.427734000 | -0.718646000 |
| N | 1.107358000  | -0.132140000 | -0.200365000 |
| C | 2.203475000  | 0.685619000  | -0.101194000 |
| H | -2.921696000 | 0.662902000  | -0.604541000 |
| H | 2.504978000  | -2.913238000 | -1.530089000 |
| C | 4.643569000  | 1.102330000  | -0.344908000 |
| H | 5.282818000  | 1.017745000  | -1.234007000 |
| H | 4.334867000  | 2.155233000  | -0.267605000 |
| C | -2.308448000 | -1.341922000 | -0.113497000 |
| C | -2.761810000 | -2.633816000 | 0.175602000  |
| C | -4.119409000 | -2.889457000 | 0.307221000  |
| C | -5.068225000 | -1.872220000 | 0.152827000  |
| C | -4.613272000 | -0.591514000 | -0.161620000 |
| C | -3.253096000 | -0.328341000 | -0.300847000 |
| H | -2.030484000 | -3.427935000 | 0.289166000  |
| H | -4.455982000 | -3.898498000 | 0.533748000  |
| H | -7.150722000 | -1.343357000 | -0.065168000 |
| H | -5.334226000 | 0.206923000  | -0.322042000 |
| C | -6.537824000 | -2.160963000 | 0.323222000  |
| H | -6.823995000 | -3.078396000 | -0.199854000 |
| H | -6.792166000 | -2.295509000 | 1.380467000  |
| C | -0.682333000 | 1.283221000  | 0.888328000  |
| H | -1.611911000 | 1.013177000  | 1.391716000  |
| H | 0.045080000  | 1.535386000  | 1.674045000  |
| C | -0.818873000 | 2.521751000  | 0.002454000  |
| H | -1.958581000 | 5.368738000  | -0.092302000 |
| H | -3.097556000 | 4.479880000  | -1.134929000 |
| N | -1.952198000 | 3.268993000  | 0.134479000  |
| H | -3.486012000 | 2.126825000  | 1.069176000  |
| O | 0.074328000  | 2.801652000  | -0.784857000 |
| C | -2.098899000 | 4.459571000  | -0.688686000 |

|   |              |              |              |
|---|--------------|--------------|--------------|
| H | -1.346417000 | 4.427695000  | -1.474056000 |
| C | -2.931906000 | 3.063325000  | 1.194053000  |
| H | -2.468057000 | 3.070541000  | 2.185668000  |
| H | -3.647344000 | 3.886201000  | 1.155333000  |
| H | 4.532146000  | -1.457276000 | -1.294576000 |
| H | 2.012144000  | 1.698854000  | 0.231329000  |
| O | 6.391553000  | -1.099355000 | 0.352303000  |
| O | 5.385792000  | 0.856993000  | 0.821596000  |
| H | 6.144283000  | 0.000063000  | 0.624807000  |
| C | 5.857308000  | -1.934862000 | 1.340437000  |
| H | 4.770719000  | -2.046791000 | 1.234638000  |
| H | 6.316274000  | -2.919468000 | 1.180501000  |
| H | 6.103932000  | -1.593022000 | 2.351724000  |

**MX**

E = -1050.95844213 Ha

|   |              |              |              |
|---|--------------|--------------|--------------|
| C | 4.075125000  | -0.083809000 | 0.214163000  |
| N | 0.542897000  | -2.123586000 | -0.320669000 |
| C | -0.307451000 | -1.101851000 | 0.003446000  |
| C | 0.377342000  | 0.043907000  | 0.362915000  |
| C | 4.151307000  | -1.460832000 | -0.184186000 |
| C | 3.027391000  | -2.208719000 | -0.393700000 |
| C | 1.755757000  | -1.616086000 | -0.189805000 |
| N | 1.712514000  | -0.284522000 | 0.217795000  |
| C | 2.845388000  | 0.468688000  | 0.392509000  |
| H | -2.180798000 | 0.718236000  | -0.733169000 |
| H | 3.064775000  | -3.240390000 | -0.711222000 |
| C | 5.338870000  | 0.709027000  | 0.387074000  |
| H | 5.921847000  | 0.718239000  | -0.538706000 |
| H | 5.111839000  | 1.740391000  | 0.666174000  |
| H | 5.974262000  | 0.267344000  | 1.160854000  |
| C | -1.766106000 | -1.274265000 | -0.032619000 |
| C | -2.337124000 | -2.511589000 | 0.287270000  |
| C | -3.714655000 | -2.676483000 | 0.269179000  |
| C | -4.568411000 | -1.620302000 | -0.070172000 |
| C | -3.994349000 | -0.396506000 | -0.413454000 |
| C | -2.612171000 | -0.225255000 | -0.404128000 |
| H | -1.679022000 | -3.335600000 | 0.544623000  |
| H | -4.142886000 | -3.643652000 | 0.522681000  |
| H | -6.348997000 | -2.699659000 | -0.641928000 |
| H | -4.635929000 | 0.428575000  | -0.714669000 |
| C | -6.063578000 | -1.812595000 | -0.067841000 |
| H | -6.441880000 | -1.948957000 | 0.951212000  |
| H | -6.575415000 | -0.949654000 | -0.501735000 |
| C | -0.093673000 | 1.318052000  | 0.979682000  |
| H | -1.091746000 | 1.144131000  | 1.384662000  |
| H | 0.553649000  | 1.581691000  | 1.829288000  |
| C | -0.038791000 | 2.496939000  | 0.008671000  |
| H | -0.251377000 | 4.318659000  | -1.644743000 |
| H | -0.952498000 | 5.384775000  | -0.403750000 |
| N | -1.135030000 | 3.306944000  | -0.065985000 |
| H | -2.816812000 | 2.306081000  | 0.768480000  |
| O | 0.966184000  | 2.678455000  | -0.664353000 |
| C | -1.088947000 | 4.451364000  | -0.962911000 |
| H | -2.021745000 | 4.512810000  | -1.531026000 |
| C | -2.250494000 | 3.237523000  | 0.869884000  |
| H | -1.920671000 | 3.340143000  | 1.909260000  |
| H | -2.925518000 | 4.066272000  | 0.650591000  |
| H | 2.688753000  | 1.516371000  | 0.618360000  |
| O | 5.414631000  | -1.937725000 | -0.348837000 |
| H | 5.368412000  | -2.861759000 | -0.633582000 |

**MX radical (C4)**

E = -1050.32231668 Ha

|   |              |              |              |
|---|--------------|--------------|--------------|
| C | 3.855503000  | -0.760130000 | 0.005761000  |
| N | 0.007828000  | -2.211452000 | 0.009265000  |
| C | -0.662370000 | -1.047095000 | -0.041624000 |
| C | 0.215171000  | 0.082186000  | -0.060182000 |
| C | 3.674269000  | -2.178091000 | 0.048283000  |
| C | 2.419982000  | -2.733161000 | 0.040827000  |
| C | 1.300204000  | -1.883631000 | -0.003528000 |
| N | 1.491624000  | -0.508082000 | -0.061368000 |
| C | 2.752560000  | 0.037734000  | -0.047789000 |
| H | -2.346573000 | 0.666196000  | -1.373125000 |
| H | 2.248329000  | -3.803434000 | 0.077858000  |
| C | 5.244525000  | -0.187948000 | 0.007402000  |
| H | 5.818631000  | -0.557998000 | -0.847413000 |
| H | 5.209601000  | 0.902265000  | -0.040905000 |
| H | 5.787437000  | -0.483387000 | 0.910479000  |

|   |              |              |              |
|---|--------------|--------------|--------------|
| C | -2.129668000 | -1.035310000 | -0.067936000 |
| C | -2.826545000 | -2.047105000 | 0.608151000  |
| C | -4.212303000 | -2.082113000 | 0.591839000  |
| C | -4.952952000 | -1.119552000 | -0.103927000 |
| C | -4.256092000 | -0.130650000 | -0.798334000 |
| C | -2.865316000 | -0.085948000 | -0.786765000 |
| H | -2.256972000 | -2.802376000 | 1.140056000  |
| H | -4.735716000 | -2.871424000 | 1.126328000  |
| H | -6.832718000 | -2.173159000 | -0.234028000 |
| H | -4.809584000 | 0.608777000  | -1.371707000 |
| C | -6.459446000 | -1.154306000 | -0.093764000 |
| H | -6.853661000 | -0.790933000 | 0.861915000  |
| H | -6.876346000 | -0.526602000 | -0.885591000 |
| C | -0.157353000 | 1.420580000  | 0.060804000  |
| H | -1.210169000 | 1.554952000  | 0.273283000  |
| C | 0.642746000  | 2.616797000  | -0.178787000 |
| H | 1.569439000  | 4.829414000  | -0.767869000 |
| H | 1.079032000  | 5.610738000  | 0.757365000  |
| N | 0.118212000  | 3.800707000  | 0.288455000  |
| H | -1.993717000 | 3.929799000  | 0.517695000  |
| O | 1.709868000  | 2.605241000  | -0.805209000 |
| C | 0.726040000  | 5.051470000  | -0.117316000 |
| H | 0.000664000  | 5.673791000  | -0.656128000 |
| C | -1.069784000 | 3.894494000  | 1.111648000  |
| H | -1.127288000 | 3.055079000  | 1.806912000  |
| H | -1.010898000 | 4.813594000  | 1.701426000  |
| H | 2.797746000  | 1.116119000  | -0.124023000 |
| O | 4.814109000  | -2.907601000 | 0.094054000  |
| H | 4.592279000  | -3.850077000 | 0.113646000  |

**MX TS(C4) HO'**

E = -1126.65168166 Ha

|   |              |              |              |
|---|--------------|--------------|--------------|
| C | 3.729024000  | -0.893608000 | 0.019156000  |
| N | -0.114840000 | -2.345443000 | -0.217488000 |
| C | -0.769875000 | -1.163473000 | -0.053870000 |
| C | 0.114594000  | -0.099548000 | 0.098115000  |
| C | 3.558366000  | -2.301259000 | -0.188289000 |
| C | 2.314880000  | -2.867032000 | -0.288063000 |
| C | 1.175356000  | -2.039361000 | -0.179056000 |
| N | 1.369534000  | -0.675498000 | 0.007195000  |
| C | 2.616111000  | -0.113241000 | 0.103622000  |
| H | -2.380190000 | 0.805516000  | -1.038163000 |
| C | 2.165886000  | -3.930298000 | -0.442825000 |
| H | 5.113286000  | -0.318917000 | 0.114288000  |
| H | 5.677185000  | -0.512275000 | -0.803145000 |
| H | 5.071520000  | 0.760214000  | 0.276957000  |
| H | 5.671411000  | -0.778209000 | 0.935807000  |
| C | -2.237615000 | -1.101874000 | -0.048596000 |
| C | -2.972647000 | -2.179353000 | 0.461359000  |
| C | -4.358753000 | -2.139067000 | 0.479988000  |
| C | -5.058230000 | -1.030626000 | -0.011558000 |
| C | -4.322632000 | 0.029207000  | -0.541313000 |
| C | -2.931211000 | -0.004430000 | -0.567489000 |
| H | -2.434072000 | -3.044372000 | 0.835229000  |
| H | -4.915419000 | -2.982800000 | 0.881290000  |
| H | -6.994828000 | -1.933512000 | -0.321137000 |
| H | -4.846008000 | 0.886038000  | -0.958149000 |
| C | -6.564288000 | -0.992436000 | 0.034389000  |
| H | -6.922327000 | -0.836198000 | 1.058064000  |
| H | -6.959834000 | -0.182611000 | -0.584088000 |
| C | -0.078631000 | 1.303525000  | 0.479706000  |
| H | -1.123854000 | 1.481349000  | 0.747419000  |
| H | 0.527954000  | 1.525528000  | 1.426947000  |
| C | 0.435195000  | 2.326454000  | -0.534671000 |
| H | 1.260149000  | 5.356795000  | -0.743036000 |
| H | -0.328685000 | 5.214109000  | -1.533729000 |
| N | 0.171229000  | 3.630799000  | -0.246962000 |
| H | -0.231765000 | 5.100216000  | 1.157567000  |
| O | 1.054658000  | 1.969168000  | -1.525514000 |
| C | 0.553627000  | 4.655501000  | -1.200729000 |
| H | 1.023159000  | 4.172092000  | -2.055392000 |
| C | -0.530416000 | 4.070314000  | 0.947041000  |
| H | -1.620381000 | 4.050794000  | 0.816129000  |
| H | -0.251696000 | 3.466797000  | 1.811879000  |
| H | 2.652941000  | 0.960553000  | 0.240555000  |
| O | 1.713795000  | 2.047706000  | 2.350922000  |
| H | 1.906650000  | 1.196827000  | 2.793612000  |
| O | 4.712858000  | -3.010375000 | -0.276631000 |
| H | 4.503405000  | -3.942204000 | -0.435402000 |



**MX TS(C4) HOO'**

E = -1201.77436055 Ha

|   |              |              |              |
|---|--------------|--------------|--------------|
| C | 3.729046000  | -0.854238000 | -0.158746000 |
| N | -0.114179000 | -2.289410000 | -0.382873000 |
| C | -0.766812000 | -1.111849000 | -0.278232000 |
| C | 0.118261000  | -0.022714000 | -0.189898000 |
| C | 3.556792000  | -2.266871000 | -0.317596000 |
| C | 2.306806000  | -2.823033000 | -0.418756000 |
| C | 1.183353000  | -1.980418000 | -0.362321000 |
| N | 1.377239000  | -0.609360000 | -0.256332000 |
| C | 2.620309000  | -0.061269000 | -0.129417000 |
| H | -2.427313000 | 0.779255000  | -1.356179000 |
| H | 2.170899000  | -3.891667000 | -0.521148000 |
| C | 5.107836000  | -0.266313000 | -0.029873000 |
| H | 5.719535000  | -0.466822000 | -0.918449000 |
| H | 5.053107000  | 0.817604000  | 0.086151000  |
| H | 5.636606000  | -0.661455000 | 0.846447000  |
| C | -2.235521000 | -1.063649000 | -0.257659000 |
| C | -2.944506000 | -2.120964000 | 0.326976000  |
| C | -4.330977000 | -2.104557000 | 0.362627000  |
| C | -5.056861000 | -1.041650000 | -0.186907000 |
| C | -4.347358000 | -0.003757000 | -0.791665000 |
| C | -2.956342000 | -0.012239000 | -0.833040000 |
| H | -2.385169000 | -2.953782000 | 0.741574000  |
| H | -4.866228000 | -2.932555000 | 0.821435000  |
| H | -4.891880000 | 0.815521000  | -1.254312000 |
| C | -6.562386000 | -1.024507000 | -0.120808000 |
| H | -6.982655000 | -0.303079000 | -0.826269000 |
| H | -6.979520000 | -2.009324000 | -0.351013000 |
| C | -0.119627000 | 1.352067000  | 0.186974000  |
| H | -1.184248000 | 1.530800000  | 0.347268000  |
| H | 0.369818000  | 1.426537000  | 1.348325000  |
| C | 0.550209000  | 2.459523000  | -0.589083000 |
| H | 1.357363000  | 4.467331000  | -1.773447000 |
| H | 1.333654000  | 5.516059000  | -0.329944000 |
| N | 0.237891000  | 3.730256000  | -0.194693000 |
| H | -1.704869000 | 4.143978000  | 0.557178000  |
| O | 1.338763000  | 2.227012000  | -1.497342000 |
| C | 0.737336000  | 4.852501000  | -0.966221000 |
| H | -0.095777000 | 5.428588000  | -1.386223000 |
| C | -0.665006000 | 4.046373000  | 0.896988000  |
| H | -0.613437000 | 3.293526000  | 1.684781000  |
| H | -0.358397000 | 5.001431000  | 1.332503000  |
| H | 2.666529000  | 1.014532000  | -0.035754000 |
| O | 0.793410000  | 1.189858000  | 2.571125000  |
| O | 0.709191000  | -0.183051000 | 2.594169000  |
| H | -0.182222000 | -0.355243000 | 2.945613000  |
| H | -6.907930000 | -0.749770000 | 0.882104000  |
| O | 4.630235000  | -3.092259000 | -0.366112000 |
| H | 5.445389000  | -2.578966000 | -0.278135000 |

**MX TS(C4) CH<sub>3</sub>O'**

E = -1165.94909175 Ha

|   |              |              |              |
|---|--------------|--------------|--------------|
| C | 3.652203000  | -0.918525000 | -0.195985000 |
| N | -0.217675000 | -2.310592000 | -0.370480000 |
| C | -0.852939000 | -1.121868000 | -0.214983000 |
| C | 0.051009000  | -0.058963000 | -0.103918000 |
| C | 3.455898000  | -2.323815000 | -0.389839000 |
| C | 2.200820000  | -2.870070000 | -0.472332000 |
| C | 1.080374000  | -2.020603000 | -0.365258000 |
| N | 1.297462000  | -0.658462000 | -0.211557000 |
| C | 2.552732000  | -0.118801000 | -0.114738000 |
| H | -2.458509000 | 0.850654000  | -1.201328000 |
| H | 2.031438000  | -3.933044000 | -0.605833000 |
| C | 5.046339000  | -0.369150000 | -0.098507000 |
| H | 5.611201000  | -0.580331000 | -1.011398000 |
| H | 5.023658000  | 0.711422000  | 0.056771000  |
| H | 5.590029000  | -0.831881000 | 0.730512000  |
| C | -2.319067000 | -1.041178000 | -0.181888000 |
| C | -3.055307000 | -2.101298000 | 0.361682000  |
| C | -4.440195000 | -2.045276000 | 0.405335000  |
| C | -5.136456000 | -0.938563000 | -0.094629000 |
| C | -4.399649000 | 0.103152000  | -0.657968000 |
| C | -3.009568000 | 0.054703000  | -0.708131000 |
| H | -2.519187000 | -2.965014000 | 0.742038000  |
| H | -4.998283000 | -2.874826000 | 0.833161000  |
| H | -7.088134000 | -1.825715000 | -0.348837000 |
| H | -4.921555000 | 0.957821000  | -1.080842000 |

|   |              |              |              |
|---|--------------|--------------|--------------|
| C | -6.640740000 | -0.882430000 | -0.021187000 |
| H | -6.976868000 | -0.701309000 | 1.005776000  |
| H | -7.039172000 | -0.080901000 | -0.648456000 |
| C | -0.110152000 | 1.340907000  | 0.267774000  |
| H | -1.150020000 | 1.559802000  | 0.523856000  |
| H | 0.506470000  | 1.492084000  | 1.265837000  |
| C | 0.478096000  | 2.367903000  | -0.689794000 |
| H | 1.194582000  | 4.253924000  | -2.105293000 |
| H | 1.517804000  | 5.353736000  | -0.738059000 |
| N | 0.337489000  | 3.670680000  | -0.312158000 |
| H | -1.395294000 | 4.215048000  | 0.790264000  |
| O | 1.053179000  | 2.026087000  | -1.713203000 |
| C | 0.765829000  | 4.718788000  | -1.219435000 |
| H | -0.086055000 | 5.345148000  | -1.509304000 |
| C | -0.311375000 | 4.093348000  | 0.917527000  |
| H | -0.114285000 | 3.392168000  | 1.730045000  |
| H | 0.106945000  | 5.060332000  | 1.209001000  |
| H | 2.609373000  | 0.951809000  | 0.030579000  |
| C | 1.162815000  | 0.157363000  | 2.931017000  |
| H | 0.838380000  | 0.186385000  | 3.981575000  |
| H | 2.065157000  | -0.466016000 | 2.830290000  |
| H | 0.357327000  | -0.363021000 | 2.370712000  |
| O | 1.349473000  | 1.429738000  | 2.426540000  |
| O | 4.594983000  | -3.054306000 | -0.476442000 |
| H | 4.368979000  | -3.985544000 | -0.615305000 |

**MX TS(C4) CH<sub>3</sub>OO'**

E = -1241.06887491 Ha

|   |              |              |              |
|---|--------------|--------------|--------------|
| C | 3.826583000  | -0.698695000 | -0.292010000 |
| N | 0.018393000  | -2.234090000 | -0.537127000 |
| C | -0.668367000 | -1.070358000 | -0.461479000 |
| C | 0.186331000  | 0.043556000  | -0.372907000 |
| C | 3.685233000  | -2.117463000 | -0.424787000 |
| C | 2.451349000  | -2.704393000 | -0.534374000 |
| C | 1.302956000  | -1.887423000 | -0.508381000 |
| N | 1.462321000  | -0.509687000 | -0.415887000 |
| C | 2.701450000  | 0.068717000  | -0.295077000 |
| H | -2.350876000 | 0.723683000  | -1.648885000 |
| H | 2.316237000  | -3.776744000 | -0.625413000 |
| C | 5.197718000  | -0.097016000 | -0.175107000 |
| H | 5.805218000  | -0.344157000 | -1.050799000 |
| H | 5.134782000  | 0.989686000  | -0.089414000 |
| H | 5.722440000  | -0.489535000 | 0.701100000  |
| C | -2.137161000 | -1.061254000 | -0.463743000 |
| C | -2.829083000 | -2.105971000 | 0.160164000  |
| C | -4.215833000 | -2.124840000 | 0.168921000  |
| C | -4.957001000 | -1.110652000 | -0.447566000 |
| C | -4.262736000 | -0.085007000 | -1.089706000 |
| C | -2.871642000 | -0.058442000 | -1.103382000 |
| H | -2.258718000 | -2.900522000 | 0.631038000  |
| H | -4.739031000 | -2.940792000 | 0.661799000  |
| H | -6.832734000 | -0.799843000 | 0.570106000  |
| H | -4.818695000 | 0.696947000  | -1.600764000 |
| C | -6.463431000 | -1.128198000 | -0.407881000 |
| H | -6.888387000 | -0.462864000 | -1.163915000 |
| H | -6.852507000 | -2.135711000 | -0.582392000 |
| C | -0.124980000 | 1.389550000  | 0.051229000  |
| H | -1.206005000 | 1.513431000  | 0.137851000  |
| H | 0.167188000  | 1.393556000  | 1.299581000  |
| C | 0.551472000  | 2.574393000  | -0.582519000 |
| H | 1.365802000  | 4.695232000  | -1.545823000 |
| H | 1.142729000  | 5.643965000  | -0.050382000 |
| N | 0.149097000  | 3.797731000  | -0.128608000 |
| H | -0.882785000 | 3.180021000  | 1.607788000  |
| O | 1.417479000  | 2.444327000  | -1.442473000 |
| C | 0.650932000  | 4.992020000  | -0.780890000 |
| H | -0.172634000 | 5.548611000  | -1.244240000 |
| C | -0.866653000 | 4.001223000  | 0.890329000  |
| H | -0.625085000 | 4.916429000  | 1.438463000  |
| H | -1.865843000 | 4.120688000  | 0.450526000  |
| H | 2.721395000  | 1.148594000  | -0.250215000 |
| C | 0.484183000  | -1.098235000 | 2.726529000  |
| H | 0.817278000  | -1.101504000 | 3.769174000  |
| H | 1.343233000  | -0.931744000 | 2.068473000  |
| H | -0.005632000 | -2.041404000 | 2.473073000  |
| O | -0.495008000 | -0.091629000 | 2.528109000  |
| O | 0.110360000  | 1.135882000  | 2.570522000  |
| O | 4.848185000  | -2.813090000 | -0.430367000 |
| H | 4.657916000  | -3.756693000 | -0.535880000 |

**MX TS(C4) CH<sub>2</sub>CHOO<sup>•</sup>**

E = -1279.14356303 Ha

|   |              |              |              |
|---|--------------|--------------|--------------|
| C | 3.753705000  | -0.620447000 | -0.465739000 |
| N | -0.038483000 | -2.201531000 | -0.657826000 |
| C | -0.737156000 | -1.052712000 | -0.540456000 |
| C | 0.107741000  | 0.072958000  | -0.447565000 |
| C | 3.628609000  | -2.035130000 | -0.635022000 |
| C | 2.399150000  | -2.637088000 | -0.728650000 |
| C | 1.244399000  | -1.836474000 | -0.650832000 |
| N | 1.386150000  | -0.460597000 | -0.541350000 |
| C | 2.617111000  | 0.129843000  | -0.422777000 |
| H | -2.476170000 | 0.758244000  | -1.621730000 |
| H | 2.275844000  | -3.708692000 | -0.842427000 |
| C | 5.118097000  | -0.002780000 | -0.354140000 |
| H | 5.716244000  | -0.218881000 | -1.244340000 |
| H | 5.041831000  | 1.080469000  | -0.239694000 |
| H | 5.660859000  | -0.409794000 | 0.504395000  |
| C | -2.205236000 | -1.063097000 | -0.504510000 |
| C | -2.866108000 | -2.139402000 | 0.099798000  |
| C | -4.251659000 | -2.178389000 | 0.145298000  |
| C | -5.022828000 | -1.153708000 | -0.414535000 |
| C | -4.360047000 | -0.096556000 | -1.038907000 |
| C | -2.970505000 | -0.049195000 | -1.088832000 |
| H | -2.272346000 | -2.942757000 | 0.524704000  |
| H | -4.750153000 | -3.018861000 | 0.622244000  |
| H | -4.940200000 | 0.694408000  | -1.507318000 |
| C | -0.207055000 | 1.406527000  | 0.012174000  |
| H | -1.286960000 | 1.515846000  | 0.129601000  |
| H | 0.136278000  | 1.416338000  | 1.225284000  |
| C | 0.430300000  | 2.606505000  | -0.641618000 |
| H | 1.184915000  | 4.742784000  | -1.618555000 |
| H | 0.992207000  | 5.683056000  | -0.113545000 |
| N | 0.027025000  | 3.821154000  | -0.167501000 |
| H | -0.932083000 | 3.184729000  | 1.603761000  |
| O | 1.266187000  | 2.490559000  | -1.531828000 |
| C | 0.489083000  | 5.025572000  | -0.831117000 |
| H | -0.357218000 | 5.569827000  | -1.267244000 |
| C | -0.957904000 | 4.004763000  | 0.885235000  |
| H | -0.716800000 | 4.925554000  | 1.423892000  |
| H | -1.973636000 | 4.102961000  | 0.479412000  |
| H | 2.624691000  | 1.207900000  | -0.343143000 |
| C | 0.472034000  | -1.064733000 | 2.524218000  |
| O | -0.435809000 | -0.043459000 | 2.560190000  |
| O | 0.155302000  | 1.191826000  | 2.544848000  |
| C | 1.795542000  | -0.952550000 | 2.580313000  |
| H | 2.403899000  | -1.846576000 | 2.526085000  |
| H | 2.275132000  | 0.011647000  | 2.683180000  |
| H | -0.065477000 | -2.003343000 | 2.427634000  |
| H | -6.873584000 | -0.901905000 | 0.662770000  |
| C | -6.527143000 | -1.193860000 | -0.334899000 |
| H | -6.981519000 | -0.510948000 | -1.057374000 |
| H | -6.907279000 | -2.200780000 | -0.530919000 |
| O | 4.799232000  | -2.714799000 | -0.689268000 |
| H | 4.618606000  | -3.657700000 | -0.816101000 |

**MX radical (O<sup>•</sup>)**

E = -1050.32818821 Ha

|   |              |              |              |
|---|--------------|--------------|--------------|
| C | 4.115181000  | -0.111796000 | 0.215843000  |
| N | 0.537016000  | -2.140800000 | -0.337547000 |
| C | -0.285037000 | -1.133959000 | -0.005243000 |
| C | 0.437288000  | 0.014685000  | 0.372996000  |
| C | 4.239155000  | -1.529653000 | -0.200047000 |
| C | 3.009274000  | -2.260660000 | -0.416346000 |
| C | 1.787977000  | -1.649336000 | -0.207359000 |
| N | 1.747669000  | -0.319403000 | 0.214886000  |
| C | 2.900212000  | 0.439062000  | 0.397566000  |
| H | -2.124264000 | 0.743182000  | -0.705030000 |
| C | 3.053198000  | -3.294061000 | -0.736286000 |
| C | 5.387784000  | 0.657920000  | 0.388088000  |
| H | 5.960309000  | 0.653978000  | -0.543998000 |
| H | 5.192404000  | 1.691524000  | 0.682949000  |
| H | 6.019027000  | 0.180591000  | 1.143425000  |
| C | -1.748221000 | -1.269690000 | -0.030313000 |
| C | -2.341796000 | -2.498125000 | 0.280818000  |
| C | -3.722331000 | -2.634082000 | 0.263147000  |
| C | -4.553659000 | -1.557283000 | -0.066699000 |
| C | -3.955555000 | -0.341608000 | -0.399475000 |
| C | -2.570896000 | -0.197373000 | -0.387746000 |

|   |              |              |              |
|---|--------------|--------------|--------------|
| H | -1.701371000 | -3.338138000 | 0.530921000  |
| H | -4.169889000 | -3.594081000 | 0.508892000  |
| H | -6.354620000 | -2.625991000 | -0.587994000 |
| H | -4.580578000 | 0.498631000  | -0.692494000 |
| C | -6.052248000 | -1.716572000 | -0.060143000 |
| H | -6.434098000 | -1.791523000 | 0.963929000  |
| H | -6.544345000 | -0.866130000 | -0.538819000 |
| C | -0.033799000 | 1.291304000  | 0.978646000  |
| H | -1.029003000 | 1.118523000  | 1.390913000  |
| H | 0.621360000  | 1.570342000  | 1.815737000  |
| C | 0.006486000  | 2.447503000  | -0.027048000 |
| H | -0.239397000 | 4.252019000  | -1.687796000 |
| H | -0.911736000 | 5.361138000  | -0.467322000 |
| N | -1.054527000 | 3.301151000  | -0.034946000 |
| H | -2.792828000 | 2.399791000  | 0.801896000  |
| O | 0.968214000  | 2.562483000  | -0.771056000 |
| C | -1.054622000 | 4.405109000  | -0.983460000 |
| H | -2.006821000 | 4.431687000  | -1.521698000 |
| C | -2.129940000 | 3.260529000  | 0.947813000  |
| H | -1.743590000 | 3.241009000  | 1.971131000  |
| H | -2.723653000 | 4.168966000  | 0.835451000  |
| H | 2.735091000  | 1.483423000  | 0.634120000  |
| O | 5.350809000  | -2.045904000 | -0.361558000 |

**MX TS(OH) HO<sup>•</sup>**

E = -1126.65647609 Ha

|   |              |              |              |
|---|--------------|--------------|--------------|
| C | -3.837193000 | 0.420589000  | -0.559319000 |
| N | -0.516324000 | -1.960143000 | 0.032592000  |
| C | 0.434483000  | -1.001658000 | -0.177800000 |
| C | -0.136706000 | 0.223146000  | -0.479609000 |
| C | -4.069626000 | -0.949312000 | -0.205624000 |
| C | -2.997227000 | -1.839255000 | 0.000325000  |
| C | -1.675983000 | -1.337311000 | -0.097975000 |
| N | -1.498577000 | 0.007737000  | -0.403779000 |
| C | -2.551462000 | 0.861976000  | -0.629202000 |
| H | 2.402258000  | 0.580881000  | 0.805839000  |
| H | -3.140371000 | -2.908835000 | -0.036089000 |
| C | -5.014131000 | 1.333639000  | -0.742361000 |
| H | -4.686977000 | 2.353158000  | -0.958255000 |
| H | -5.652259000 | 0.988018000  | -1.561000000 |
| H | -5.629522000 | 1.342382000  | 0.161643000  |
| C | 1.869993000  | -1.301983000 | -0.091489000 |
| C | 2.355227000  | -2.550693000 | -0.495704000 |
| C | 3.712022000  | -2.832855000 | -0.426147000 |
| C | 4.627326000  | -1.886345000 | 0.048815000  |
| C | 4.135664000  | -0.652171000 | 0.474247000  |
| C | 2.774716000  | -0.363788000 | 0.413749000  |
| H | 1.649692000  | -3.291435000 | -0.858934000 |
| H | 4.074354000  | -3.807266000 | -0.745417000 |
| H | 6.648810000  | -1.449799000 | 0.670683000  |
| H | 4.823676000  | 0.085680000  | 0.880452000  |
| C | 6.100271000  | -2.202459000 | 0.098542000  |
| H | 6.279625000  | -3.177828000 | 0.561013000  |
| H | 6.529521000  | -2.235508000 | -0.908892000 |
| C | 0.475090000  | 1.486454000  | -0.984196000 |
| H | 1.480053000  | 1.251717000  | -1.337324000 |
| H | -0.091659000 | 1.854066000  | -1.851917000 |
| C | 0.445932000  | 2.603603000  | 0.060086000  |
| H | 1.547233000  | 5.368974000  | 0.724276000  |
| H | 2.462959000  | 4.349316000  | 1.863132000  |
| N | 1.595617000  | 3.306285000  | 0.267983000  |
| H | 3.233037000  | 2.215056000  | -0.540437000 |
| O | -0.591260000 | 2.827364000  | 0.667794000  |
| C | 1.571476000  | 4.397219000  | 1.231436000  |
| H | 0.679430000  | 4.293094000  | 1.845726000  |
| C | 2.767368000  | 3.204084000  | -0.593715000 |
| H | 2.529114000  | 3.428979000  | -1.638990000 |
| H | 3.499805000  | 3.937270000  | -0.252750000 |
| H | -2.287073000 | 1.899922000  | -0.792769000 |
| O | -4.150699000 | -2.346932000 | 1.904716000  |
| H | -5.126256000 | -2.008874000 | 0.817767000  |
| O | -5.301440000 | -1.349741000 | 0.025958000  |
| H | -3.866712000 | -3.268934000 | 2.022584000  |

**MX TS(OH) OOH<sup>•</sup>**

E = -1201.78355968 Ha

|   |              |              |              |
|---|--------------|--------------|--------------|
| C | 3.521615000  | 0.621529000  | -0.226804000 |
| N | 0.253339000  | -1.863429000 | -0.658136000 |
| C | -0.683846000 | -1.007049000 | -0.193296000 |

|   |              |              |              |
|---|--------------|--------------|--------------|
| C | -0.117150000 | 0.207698000  | 0.206343000  |
| C | 3.765325000  | -0.707541000 | -0.752785000 |
| C | 2.708036000  | -1.599390000 | -0.916383000 |
| C | 1.408265000  | -1.198312000 | -0.584145000 |
| N | 1.216632000  | 0.084293000  | -0.069265000 |
| C | 2.254771000  | 0.982499000  | 0.088859000  |
| H | -2.834953000 | 0.598399000  | -0.619343000 |
| H | 2.879937000  | -2.588438000 | -1.323133000 |
| C | 4.690034000  | 1.545130000  | -0.054657000 |
| H | 5.213347000  | 1.680911000  | -1.005645000 |
| H | 4.367925000  | 2.520829000  | 0.315370000  |
| H | 5.407561000  | 1.116694000  | 0.653534000  |
| C | -2.106388000 | -1.368543000 | -0.125551000 |
| C | -2.481831000 | -2.691741000 | 0.133382000  |
| C | -3.822784000 | -3.039711000 | 0.206007000  |
| C | -4.831198000 | -2.086692000 | 0.020394000  |
| C | -4.451935000 | -0.774301000 | -0.261883000 |
| C | -3.108328000 | -0.417675000 | -0.340958000 |
| H | -1.703856000 | -3.436067000 | 0.271304000  |
| H | -4.099028000 | -4.071511000 | 0.410086000  |
| H | -6.553598000 | -2.722822000 | 1.153635000  |
| H | -5.218215000 | -0.024394000 | -0.443791000 |
| C | -6.282991000 | -2.478875000 | 0.120538000  |
| H | -6.937078000 | -1.669936000 | -0.214643000 |
| H | -6.495913000 | -3.362375000 | -0.489059000 |
| C | -0.710002000 | 1.361891000  | 0.939209000  |
| H | -1.635163000 | 1.021795000  | 1.406881000  |
| H | -0.034929000 | 1.674465000  | 1.749035000  |
| C | -0.908554000 | 2.579433000  | 0.032307000  |
| H | -1.530123000 | 4.434128000  | -1.469498000 |
| H | -2.247714000 | 5.345431000  | -0.118597000 |
| N | -2.085444000 | 3.257421000  | 0.144682000  |
| H | -3.590147000 | 2.039151000  | 1.030833000  |
| O | -0.023730000 | 2.898317000  | -0.747749000 |
| C | -2.302609000 | 4.419952000  | -0.703229000 |
| H | -3.288118000 | 4.356257000  | -1.174009000 |
| C | -3.071383000 | 2.992077000  | 1.184740000  |
| H | -2.620833000 | 2.992869000  | 2.182030000  |
| H | -3.814613000 | 3.790304000  | 1.155919000  |
| H | 1.973627000  | 1.974095000  | 0.420709000  |
| O | 6.002584000  | -1.363840000 | 0.997432000  |
| O | 4.981661000  | -1.048153000 | -1.130064000 |
| H | 5.619366000  | -1.115794000 | -0.242549000 |
| O | 4.801810000  | -1.321977000 | 1.641692000  |
| H | 4.537928000  | -2.259027000 | 1.706958000  |

#### MX TS(OH) CH<sub>3</sub>O<sup>•</sup>

E = -1165.94963209 Ha

|   |              |              |               |
|---|--------------|--------------|---------------|
| C | 3.377243000  | 1.469360000  | 0.140164000   |
| N | 0.631595000  | -1.564579000 | -0.374534000  |
| C | -0.479517000 | -0.866715000 | -0.019844000  |
| C | -0.166004000 | 0.432283000  | 0.364599000   |
| C | 3.892711000  | 0.179742000  | -0.253151000  |
| C | 3.017377000  | -0.889555000 | -0.482325000  |
| C | 1.643982000  | -0.711331000 | -0.238322000  |
| N | 1.197795000  | 0.530425000  | 0.200989000   |
| C | 2.043311000  | 1.607093000  | 0.348612000   |
| H | -2.825757000 | 0.312610000  | -0.7111846000 |
| H | 3.356540000  | -1.825846000 | -0.900293000  |
| C | 4.339534000  | 2.608346000  | 0.306818000   |
| H | 4.875962000  | 2.800543000  | -0.626914000  |
| H | 3.817675000  | 3.520208000  | 0.605884000   |
| H | 5.092714000  | 2.363568000  | 1.061376000   |
| C | -1.818645000 | -1.471375000 | -0.046057000  |
| C | -1.983482000 | -2.827176000 | 0.258469000   |
| C | -3.246542000 | -3.401751000 | 0.244287000   |
| C | -4.382975000 | -2.649696000 | -0.074619000  |
| C | -4.210503000 | -1.304571000 | -0.402090000  |
| C | -2.945945000 | -0.722024000 | -0.395873000  |
| H | -1.104807000 | -3.416773000 | 0.500665000   |
| H | -3.358637000 | -4.456395000 | 0.484604000   |
| H | -6.485766000 | -2.650799000 | -0.566704000  |
| H | -5.074772000 | -0.709532000 | -0.688189000  |
| C | -5.750789000 | -3.282762000 | -0.061445000  |
| H | -5.740323000 | -4.256922000 | -0.559362000  |
| H | -6.098925000 | -3.444648000 | 0.964750000   |
| C | -1.004254000 | 1.494453000  | 0.989571000   |
| H | -1.894911000 | 1.016754000  | 1.400637000   |
| H | -0.464472000 | 1.948226000  | 1.833202000   |

|   |              |              |              |
|---|--------------|--------------|--------------|
| C | -1.329206000 | 2.626372000  | 0.011886000  |
| H | -2.123331000 | 4.290329000  | -1.627311000 |
| H | -3.110618000 | 5.099106000  | -0.385828000 |
| N | -2.613802000 | 3.080809000  | -0.016205000 |
| H | -3.294484000 | 2.817730000  | 1.978310000  |
| O | -0.444572000 | 3.079547000  | -0.700013000 |
| C | -2.949361000 | 4.161776000  | -0.930751000 |
| H | -3.860810000 | 3.910924000  | -1.481364000 |
| C | -3.631496000 | 2.677508000  | 0.946414000  |
| H | -4.507877000 | 3.309286000  | 0.794169000  |
| H | -3.937858000 | 1.634317000  | 0.812113000  |
| H | 1.568470000  | 2.549875000  | 0.591724000  |
| O | 5.160298000  | -2.170292000 | 0.561408000  |
| O | 5.193573000  | 0.052603000  | -0.383017000 |
| H | 5.370981000  | -0.954730000 | -0.087828000 |
| C | 5.465267000  | -3.296282000 | -0.171325000 |
| H | 6.542795000  | -3.520813000 | -0.061247000 |
| H | 4.924226000  | -4.173618000 | 0.211303000  |
| H | 5.266252000  | -3.187032000 | -1.250721000 |

#### MXI

E = -1050.95249333 Ha

|   |              |              |              |
|---|--------------|--------------|--------------|
| C | 4.430969000  | -0.542107000 | 0.174112000  |
| N | 0.822990000  | -2.437847000 | -0.361372000 |
| C | 0.014336000  | -1.389439000 | -0.042185000 |
| C | 0.746175000  | -0.263054000 | 0.306456000  |
| C | 4.457729000  | -1.916955000 | -0.223041000 |
| C | 3.305690000  | -2.616113000 | -0.433942000 |
| C | 2.057130000  | -1.975162000 | -0.236565000 |
| N | 2.064123000  | -0.639413000 | 0.163262000  |
| C | 3.227244000  | 0.070742000  | 0.349086000  |
| H | -1.800174000 | 0.467744000  | -0.820886000 |
| H | 3.297957000  | -3.653604000 | -0.746305000 |
| C | 5.716757000  | 0.216042000  | 0.364877000  |
| H | 6.311478000  | 0.214883000  | -0.554335000 |
| H | 5.526500000  | 1.255674000  | 0.641853000  |
| H | 6.327718000  | -0.239497000 | 1.151318000  |
| C | -1.450419000 | -1.511845000 | -0.058398000 |
| C | -2.059445000 | -2.716771000 | 0.310896000  |
| C | -3.442042000 | -2.832116000 | 0.315562000  |
| C | -4.262119000 | -1.757187000 | -0.047827000 |
| C | -3.650059000 | -0.566838000 | -0.439626000 |
| C | -2.262754000 | -0.445948000 | -0.453805000 |
| H | -1.427993000 | -3.554888000 | 0.588686000  |
| H | -3.901115000 | -3.774052000 | 0.606870000  |
| H | -6.087545000 | -2.804805000 | -0.528589000 |
| H | -4.266596000 | 0.270688000  | -0.758172000 |
| C | -5.762957000 | -1.893787000 | -0.016445000 |
| H | -6.131398000 | -1.950213000 | 1.013729000  |
| H | -6.249355000 | -1.041942000 | -0.498653000 |
| C | 0.321337000  | 1.029266000  | 0.926796000  |
| H | -0.671692000 | 0.875879000  | 1.348727000  |
| H | 0.995909000  | 1.271019000  | 1.759375000  |
| C | 0.421180000  | 2.201541000  | -0.050405000 |
| H | 0.135006000  | 3.662741000  | -2.161523000 |
| H | 0.011493000  | 4.861180000  | -0.859965000 |
| N | -0.697730000 | 2.917942000  | -0.394094000 |
| H | -2.072541000 | 2.050658000  | 0.919940000  |
| O | 1.506737000  | 2.459734000  | -0.547859000 |
| C | -0.486723000 | 4.013092000  | -1.338504000 |
| H | -1.459249000 | 4.338781000  | -1.711432000 |
| C | -1.946848000 | 2.964845000  | 0.336945000  |
| H | -2.766641000 | 3.023907000  | -0.383988000 |
| H | 3.107189000  | 1.123355000  | 0.573755000  |
| H | 5.421067000  | -2.397174000 | -0.370177000 |
| O | -2.065617000 | 4.119503000  | 1.127443000  |
| H | -1.405740000 | 4.071733000  | 1.834606000  |

#### MXI radical (C4)

E = -1050.31547040 Ha

|   |              |              |              |
|---|--------------|--------------|--------------|
| C | -3.760774000 | -1.885240000 | -0.017239000 |
| N | 0.301618000  | -2.500884000 | -0.127802000 |
| C | 0.717660000  | -1.241630000 | 0.051342000  |
| C | -0.377412000 | -0.324289000 | 0.180914000  |
| C | -3.297910000 | -3.219519000 | -0.206953000 |
| C | -1.958939000 | -3.500103000 | -0.243751000 |
| C | -1.033864000 | -2.450380000 | -0.095692000 |
| N | -1.502911000 | -1.156605000 | 0.104567000  |
| C | -2.850260000 | -0.878686000 | 0.134280000  |

|   |              |              |              |
|---|--------------|--------------|--------------|
| H | 2.024254000  | 0.609086000  | 1.603964000  |
| H | -1.568694000 | -4.499799000 | -0.391169000 |
| C | -5.236142000 | -1.590563000 | 0.027120000  |
| H | -5.720218000 | -2.143256000 | 0.838738000  |
| H | -5.421100000 | -0.525916000 | 0.185769000  |
| H | -5.722757000 | -1.886198000 | -0.908115000 |
| C | 2.150903000  | -0.924818000 | 0.094011000  |
| C | 3.032879000  | -1.675373000 | -0.695837000 |
| C | 4.395072000  | -1.419237000 | -0.668719000 |
| C | 4.927023000  | -0.416390000 | 0.150124000  |
| C | 4.049198000  | 0.309657000  | 0.955255000  |
| C | 2.680155000  | 0.061716000  | 0.933777000  |
| H | 2.627002000  | -2.461592000 | -1.324308000 |
| H | 5.064282000  | -2.007728000 | -1.291762000 |
| H | 6.988058000  | -1.057454000 | 0.155816000  |
| H | 4.443632000  | 1.071932000  | 1.622243000  |
| C | 6.406507000  | -0.130860000 | 0.151613000  |
| H | 6.696781000  | 0.433135000  | -0.741831000 |
| H | 6.696397000  | 0.458120000  | 1.025479000  |
| C | -0.277868000 | 1.068089000  | 0.206259000  |
| H | 0.728155000  | 1.424106000  | 0.024904000  |
| C | -1.293251000 | 2.052541000  | 0.568141000  |
| H | -2.583565000 | 4.076710000  | 1.435513000  |
| H | -2.846097000 | 4.285844000  | -0.308721000 |
| N | -1.015085000 | 3.377092000  | 0.254574000  |
| H | 0.861336000  | 3.258500000  | -0.659598000 |
| O | -2.333360000 | 1.763170000  | 1.162981000  |
| C | -2.098508000 | 4.322205000  | 0.492945000  |
| H | -1.680198000 | 5.329904000  | 0.545919000  |
| C | -0.120222000 | 3.708859000  | -0.834839000 |
| H | 0.005245000  | 4.792701000  | -0.838148000 |
| H | -3.113726000 | 0.152776000  | 0.322356000  |
| H | -4.025900000 | -4.017603000 | -0.322303000 |
| O | -0.621372000 | 3.370704000  | -2.104022000 |
| H | -0.625866000 | 2.402660000  | -2.162298000 |

#### MXI TS(C4) HO\*

E = -1126.65359266 Ha

|   |              |              |              |
|---|--------------|--------------|--------------|
| C | 3.274646000  | -2.306953000 | -0.100008000 |
| N | -0.833426000 | -2.559732000 | -0.129295000 |
| C | -1.101931000 | -1.231669000 | -0.069295000 |
| C | 0.069033000  | -0.470752000 | -0.034162000 |
| C | 2.692591000  | -3.610766000 | -0.133587000 |
| C | 1.336220000  | -3.784709000 | -0.167100000 |
| C | 0.491079000  | -2.653136000 | -0.141309000 |
| N | 1.086584000  | -1.394912000 | -0.098660000 |
| C | 2.448887000  | -1.219297000 | -0.094973000 |
| H | -2.073375000 | 1.046250000  | -1.196782000 |
| H | 0.873640000  | -4.763838000 | -0.202376000 |
| C | 4.770181000  | -2.141015000 | -0.111225000 |
| H | 5.202902000  | -2.583319000 | -1.014034000 |
| H | 5.054559000  | -1.086206000 | -0.085048000 |
| H | 5.226618000  | -2.639858000 | 0.749859000  |
| C | -2.479772000 | -0.725069000 | -0.041160000 |
| C | -3.483364000 | -1.478322000 | 0.580090000  |
| C | -4.787906000 | -1.010014000 | 0.620229000  |
| C | -5.135833000 | 0.216315000  | 0.041224000  |
| C | -4.136773000 | 0.950852000  | -0.597268000 |
| C | -2.825233000 | 0.487273000  | -0.645518000 |
| H | -3.218668000 | -2.432488000 | 1.024623000  |
| H | -5.556921000 | -1.603597000 | 1.108929000  |
| H | -7.266022000 | -0.060999000 | -0.171090000 |
| H | -4.391147000 | 1.890965000  | -1.079903000 |
| C | -6.554274000 | 0.720650000  | 0.111486000  |
| H | -6.806822000 | 1.039564000  | 1.128723000  |
| H | -6.705453000 | 1.574827000  | -0.553357000 |
| C | 0.326089000  | 0.940091000  | 0.288844000  |
| H | -0.612483000 | 1.443114000  | 0.538697000  |
| H | 0.945522000  | 0.965702000  | 1.241142000  |
| C | 1.107502000  | 1.709010000  | -0.781894000 |
| H | 1.962604000  | 3.361373000  | -2.506446000 |
| H | 3.265956000  | 3.565223000  | -1.310623000 |
| N | 1.373845000  | 3.026535000  | -0.534320000 |
| H | 1.069258000  | 4.671031000  | 0.678787000  |
| O | 1.452726000  | 1.149974000  | -1.810784000 |
| C | 2.201679000  | 3.726154000  | -1.509146000 |
| H | 1.989587000  | 4.795876000  | -1.441264000 |
| C | 1.348853000  | 3.620648000  | 0.794529000  |
| H | 0.582277000  | 3.122781000  | 1.395317000  |

|   |             |              |              |
|---|-------------|--------------|--------------|
| H | 3.351558000 | -4.474060000 | -0.148604000 |
| H | 2.803672000 | -0.197248000 | -0.155632000 |
| O | 2.224020000 | 0.952012000  | 2.322182000  |
| O | 2.597916000 | 3.605152000  | 1.415255000  |
| H | 2.745345000 | 2.698085000  | 1.740250000  |
| H | 2.601023000 | 0.070731000  | 2.122986000  |

#### MXI TS(C4) HOO\*

E = -1201.77625346 Ha

|   |              |              |              |
|---|--------------|--------------|--------------|
| C | 3.261522000  | -2.289907000 | -0.237313000 |
| N | -0.844860000 | -2.491305000 | -0.180013000 |
| C | -1.110325000 | -1.171358000 | -0.213752000 |
| C | 0.069230000  | -0.399163000 | -0.266357000 |
| C | 2.664009000  | -3.584261000 | -0.214678000 |
| C | 1.304875000  | -3.737364000 | -0.205252000 |
| C | 0.486677000  | -2.589161000 | -0.221998000 |
| N | 1.089892000  | -1.342763000 | -0.279919000 |
| C | 2.452179000  | -1.191780000 | -0.266245000 |
| H | -2.184638000 | 0.935304000  | -1.590335000 |
| H | 0.821219000  | -4.706189000 | -0.176656000 |
| C | 4.758808000  | -2.142059000 | -0.230875000 |
| H | 5.202414000  | -2.631236000 | -1.103919000 |
| H | 5.052962000  | -1.090291000 | -0.247495000 |
| H | 5.192754000  | -2.602447000 | 0.662440000  |
| C | -2.495226000 | -0.677240000 | -0.195136000 |
| C | -3.455910000 | -1.364136000 | 0.557254000  |
| C | -4.770984000 | -0.924193000 | 0.589128000  |
| C | -5.173303000 | 0.206369000  | -0.130745000 |
| C | -4.218479000 | 0.870360000  | -0.901611000 |
| C | -2.897255000 | 0.435912000  | -0.939996000 |
| H | -3.152108000 | -2.249720000 | 1.106706000  |
| H | -5.504767000 | -1.466893000 | 1.180193000  |
| H | -7.302951000 | -0.145696000 | -0.117056000 |
| H | -4.516338000 | 1.730824000  | -1.495130000 |
| C | -6.599006000 | 0.690137000  | -0.067037000 |
| H | -6.789568000 | 1.222722000  | 0.871362000  |
| H | -6.822960000 | 1.374739000  | -0.889056000 |
| C | 0.254820000  | 1.024826000  | -0.099694000 |
| H | -0.703307000 | 1.548595000  | -0.081117000 |
| H | 0.631557000  | 1.153927000  | 1.084700000  |
| C | 1.275621000  | 1.726412000  | -0.978299000 |
| H | 2.401013000  | 4.729371000  | -1.526684000 |
| H | 2.716932000  | 3.198640000  | -2.389901000 |
| N | 1.588030000  | 3.018308000  | -0.649211000 |
| H | 1.268586000  | 4.680552000  | 0.523148000  |
| O | 1.764773000  | 1.153935000  | -1.940909000 |
| C | 2.645175000  | 3.669678000  | -1.411941000 |
| H | 3.603787000  | 3.581731000  | -0.890009000 |
| C | 1.336646000  | 3.598572000  | 0.662520000  |
| H | 0.374344000  | 3.240813000  | 1.040464000  |
| H | 3.309978000  | -4.457579000 | -0.199366000 |
| H | 2.827865000  | -0.179330000 | -0.299053000 |
| O | 1.106244000  | -0.256016000 | 2.522860000  |
| H | 0.224225000  | -0.548927000 | 2.813298000  |
| O | 0.946786000  | 1.103262000  | 2.368765000  |
| O | 2.375216000  | 3.372339000  | 1.568418000  |
| H | 2.238987000  | 2.493396000  | 1.966556000  |

#### MXI TS(C4) CH<sub>3</sub>O\*

E = -1165.95147294 Ha

|   |              |              |              |
|---|--------------|--------------|--------------|
| C | 3.235828000  | -2.246509000 | -0.306643000 |
| N | -0.870174000 | -2.513927000 | -0.252731000 |
| C | -1.147767000 | -1.194862000 | -0.189173000 |
| C | 0.022994000  | -0.415572000 | -0.190206000 |
| C | 2.657286000  | -3.548507000 | -0.361477000 |
| C | 1.300000000  | -3.727614000 | -0.360551000 |
| C | 0.460239000  | -2.596903000 | -0.302769000 |
| N | 1.049791000  | -1.339650000 | -0.273479000 |
| C | 2.409517000  | -1.159640000 | -0.267084000 |
| H | -2.194042000 | 1.028117000  | -1.372196000 |
| H | 0.836593000  | -4.706190000 | -0.393280000 |
| C | 4.730820000  | -2.075771000 | -0.303628000 |
| H | 5.171139000  | -2.479948000 | -1.220735000 |
| H | 5.008012000  | -1.021796000 | -0.231193000 |
| H | 5.183119000  | -2.605326000 | 0.540946000  |
| C | -2.531356000 | -0.704113000 | -0.136477000 |
| C | -3.502052000 | -1.451494000 | 0.541298000  |
| C | -4.814232000 | -1.006571000 | 0.601612000  |
| C | -5.202449000 | 0.188893000  | -0.014356000 |

|   |              |              |              |
|---|--------------|--------------|--------------|
| C | -4.236516000 | 0.915757000  | -0.711005000 |
| C | -2.917714000 | 0.476945000  | -0.777829000 |
| H | -3.207033000 | -2.383912000 | 1.012231000  |
| H | -5.557197000 | -1.595412000 | 1.134145000  |
| H | -6.838611000 | 1.432579000  | -0.676490000 |
| H | -4.523571000 | 1.829893000  | -1.224222000 |
| C | -6.625945000 | 0.674040000  | 0.081118000  |
| H | -7.334142000 | -0.149105000 | -0.051345000 |
| H | -6.822090000 | 1.119487000  | 1.062817000  |
| C | 0.248246000  | 1.004227000  | 0.054302000  |
| H | -0.699118000 | 1.510554000  | 0.253136000  |
| H | 0.882068000  | 1.073632000  | 1.024510000  |
| C | 1.101565000  | 1.741055000  | -0.978385000 |
| H | 2.581690000  | 3.116501000  | -2.402712000 |
| H | 3.314736000  | 3.906347000  | -0.975512000 |
| N | 1.439821000  | 3.027812000  | -0.667382000 |
| H | 1.044542000  | 4.715968000  | 0.445168000  |
| O | 1.462953000  | 1.180036000  | -2.000518000 |
| C | 2.385319000  | 3.728617000  | -1.524900000 |
| H | 1.964379000  | 4.690746000  | -1.834239000 |
| C | 1.211931000  | 3.651066000  | 0.629851000  |
| H | 0.303163000  | 3.234496000  | 1.073168000  |
| H | 3.317558000  | -4.410261000 | -0.402636000 |
| H | 2.762050000  | -0.138538000 | -0.222527000 |
| C | 1.458695000  | -0.239173000 | 2.786922000  |
| H | 1.199192000  | 0.037022000  | 3.818210000  |
| H | 2.163643000  | -1.085228000 | 2.778928000  |
| H | 0.529063000  | -0.616318000 | 2.307400000  |
| O | 1.955792000  | 0.825037000  | 2.063991000  |
| O | 2.305808000  | 3.561286000  | 1.488790000  |
| H | 2.315917000  | 2.662936000  | 1.869753000  |

#### MXI TS(C4) CH<sub>2</sub>OO\*

E = -1241.06951075 Ha

|   |              |              |              |
|---|--------------|--------------|--------------|
| C | 3.280127000  | -2.233637000 | -0.374989000 |
| N | -0.827018000 | -2.429397000 | -0.420919000 |
| C | -1.087726000 | -1.108651000 | -0.442777000 |
| C | 0.093410000  | -0.337915000 | -0.461307000 |
| C | 2.680984000  | -3.526814000 | -0.385117000 |
| C | 1.321510000  | -3.677995000 | -0.415305000 |
| C | 0.505397000  | -2.529176000 | -0.437694000 |
| N | 1.111656000  | -1.282940000 | -0.469251000 |
| C | 2.472728000  | -1.133711000 | -0.414599000 |
| H | -2.144233000 | 1.042999000  | -1.760761000 |
| H | 0.836733000  | -4.646707000 | -0.410790000 |
| C | 4.776794000  | -2.087683000 | -0.325023000 |
| H | 5.244264000  | -2.567239000 | -1.190938000 |
| H | 5.072380000  | -1.036156000 | -0.321122000 |
| H | 5.185161000  | -2.559027000 | 0.574610000  |
| C | -2.467098000 | -0.603762000 | -0.409670000 |
| C | -3.430091000 | -1.296369000 | 0.335811000  |
| C | -4.739364000 | -0.840938000 | 0.389421000  |
| C | -5.132925000 | 0.311472000  | -0.300111000 |
| C | -4.175577000 | 0.983471000  | -1.061371000 |
| C | -2.860168000 | 0.534524000  | -1.121159000 |
| H | -3.131183000 | -2.198141000 | 0.861755000  |
| H | -5.475229000 | -1.388226000 | 0.973635000  |
| H | -6.729495000 | 1.321037000  | 0.739730000  |
| H | -4.467308000 | 1.862893000  | -1.629604000 |
| C | -6.552026000 | 0.810846000  | -0.213566000 |
| H | -6.773045000 | 1.519346000  | -1.015857000 |
| H | -7.266643000 | -0.014689000 | -0.280287000 |
| C | 0.283712000  | 1.073315000  | -0.222217000 |
| H | -0.665951000 | 1.611835000  | -0.194931000 |
| H | 0.639587000  | 1.108190000  | 0.992698000  |
| C | 1.338102000  | 1.805140000  | -1.029928000 |
| H | 2.740778000  | 3.420389000  | -2.365754000 |
| H | 3.745938000  | 3.439284000  | -0.895666000 |
| N | 1.688444000  | 3.059660000  | -0.602726000 |
| H | 1.482734000  | 4.607508000  | 0.740180000  |
| O | 1.825711000  | 1.293500000  | -2.027058000 |
| C | 2.774670000  | 3.716496000  | -1.319197000 |
| H | 2.647976000  | 4.798665000  | -1.234356000 |
| C | 1.491183000  | 3.515055000  | 0.765914000  |
| H | 0.517957000  | 3.171760000  | 1.127948000  |
| H | 3.325171000  | -4.401289000 | -0.362850000 |
| H | 2.851628000  | -0.121738000 | -0.431704000 |
| O | 0.765954000  | -0.430883000 | 2.329760000  |
| O | 0.947423000  | 0.926830000  | 2.249513000  |

|   |              |              |             |
|---|--------------|--------------|-------------|
| O | 2.531800000  | 3.139802000  | 1.620956000 |
| H | 2.353815000  | 2.236683000  | 1.938466000 |
| C | -0.539260000 | -0.675736000 | 2.834639000 |
| H | -1.287640000 | -0.161736000 | 2.222430000 |
| H | -0.678096000 | -1.757049000 | 2.763674000 |
| H | -0.610257000 | -0.341439000 | 3.873846000 |

#### MXI TS(C4) CH<sub>2</sub>CHO\*

E = -1279.14231888 Ha

|   |              |              |              |
|---|--------------|--------------|--------------|
| C | 3.521230000  | -1.919225000 | -0.571518000 |
| N | -0.551589000 | -2.496511000 | -0.550208000 |
| C | -0.931938000 | -1.207878000 | -0.559843000 |
| C | 0.178167000  | -0.331545000 | -0.608739000 |
| C | 3.043886000  | -3.262877000 | -0.569124000 |
| C | 1.703834000  | -3.541271000 | -0.583627000 |
| C | 0.784179000  | -2.473954000 | -0.592532000 |
| N | 1.271978000  | -1.175514000 | -0.646272000 |
| C | 2.615714000  | -0.897640000 | -0.610173000 |
| H | -2.180827000 | 0.902398000  | -1.769670000 |
| H | 1.312261000  | -4.551266000 | -0.569635000 |
| C | 4.998955000  | -1.635728000 | -0.547309000 |
| H | 5.493752000  | -2.073899000 | -1.419903000 |
| H | 5.195773000  | -0.561414000 | -0.551533000 |
| H | 5.464784000  | -2.064034000 | 0.345961000  |
| C | -2.348817000 | -0.829765000 | -0.498614000 |
| C | -3.240963000 | -1.640108000 | 0.215040000  |
| C | -4.584522000 | -1.306174000 | 0.292430000  |
| C | -5.083465000 | -0.162265000 | -0.341622000 |
| C | -4.194928000 | 0.627476000  | -1.072067000 |
| C | -2.845078000 | 0.300695000  | -1.155473000 |
| H | -2.858851000 | -2.533739000 | 0.698772000  |
| H | -5.265032000 | -1.942553000 | 0.852967000  |
| H | -4.567217000 | 1.503342000  | -1.596973000 |
| C | 0.239891000  | 1.070812000  | -0.269266000 |
| H | -0.764052000 | 1.455869000  | -0.087747000 |
| H | 0.745098000  | 1.074040000  | 0.865990000  |
| H | 3.766948000  | -4.073565000 | -0.553491000 |
| H | 2.889841000  | 0.146815000  | -0.663080000 |
| C | 0.122340000  | -1.027512000 | 2.676727000  |
| O | -0.040188000 | 0.330730000  | 2.636163000  |
| O | 1.077916000  | 0.980668000  | 2.181241000  |
| C | 1.245298000  | -1.706908000 | 2.465477000  |
| H | 1.224562000  | -2.786872000 | 2.532398000  |
| H | 2.177836000  | -1.207443000 | 2.235807000  |
| H | -0.834323000 | -1.477025000 | 2.923653000  |
| H | -6.762892000 | 0.622887000  | 0.758442000  |
| C | -6.541123000 | 0.202215000  | -0.228619000 |
| H | -6.824145000 | 0.945264000  | -0.978420000 |
| H | -7.179644000 | -0.676331000 | -0.360153000 |
| C | 1.122884000  | 2.018526000  | -1.049608000 |
| H | 1.557332000  | 5.159992000  | -1.538520000 |
| H | 2.527746000  | 3.768885000  | -2.091348000 |
| N | 1.110364000  | 3.322150000  | -0.635494000 |
| H | 0.231124000  | 4.834667000  | 0.441996000  |
| O | 1.815565000  | 1.619899000  | -1.976835000 |
| C | 2.069807000  | 4.244564000  | -1.226810000 |
| H | 2.838780000  | 4.500079000  | -0.490665000 |
| C | 0.504304000  | 3.788704000  | 0.607042000  |
| H | -0.410886000 | 3.224187000  | 0.801602000  |
| O | 1.374694000  | 3.758534000  | 1.696211000  |
| H | 1.304932000  | 2.879354000  | 2.112484000  |

#### MXI radical (O\*)

E = -1050.28579828 Ha

|   |              |              |              |
|---|--------------|--------------|--------------|
| C | -4.383989000 | -0.627649000 | -0.157490000 |
| N | -0.719664000 | -2.430350000 | 0.321742000  |
| C | 0.054716000  | -1.344815000 | 0.042294000  |
| C | -0.712004000 | -0.233387000 | -0.274618000 |
| C | -4.369152000 | -2.016638000 | 0.189388000  |
| C | -3.197116000 | -2.688581000 | 0.377289000  |
| C | -1.967784000 | -2.004036000 | 0.205995000  |
| N | -2.016026000 | -0.656391000 | -0.149045000 |
| C | -3.198926000 | 0.025654000  | -0.309339000 |
| H | 1.785357000  | 0.553507000  | 0.909658000  |
| H | -3.159414000 | -3.735767000 | 0.653037000  |
| C | -5.692035000 | 0.097823000  | -0.321461000 |
| H | -6.284819000 | 0.047748000  | 0.597653000  |
| H | -5.533538000 | 1.151403000  | -0.563534000 |
| H | -6.290296000 | -0.348969000 | -1.122509000 |

|   |              |              |              |
|---|--------------|--------------|--------------|
| C | 1.522691000  | -1.410736000 | 0.070634000  |
| C | 2.184620000  | -2.576232000 | -0.331213000 |
| C | 3.571085000  | -2.635802000 | -0.322781000 |
| C | 4.343316000  | -1.542914000 | 0.087644000  |
| C | 3.678972000  | -0.392667000 | 0.513451000  |
| C | 2.287507000  | -0.327459000 | 0.513630000  |
| H | 1.591006000  | -3.428989000 | -0.645442000 |
| H | 4.070724000  | -3.547980000 | -0.640771000 |
| H | 6.203902000  | -2.533700000 | 0.553704000  |
| H | 4.257810000  | 0.455116000  | 0.873494000  |
| C | 5.848650000  | -1.618329000 | 0.070578000  |
| H | 6.230673000  | -1.622375000 | -0.956159000 |
| H | 6.294976000  | -0.766079000 | 0.589523000  |
| C | -0.322982000 | 1.093327000  | -0.837614000 |
| H | 0.673945000  | 0.994627000  | -1.269043000 |
| H | -0.994931000 | 1.365418000  | -1.662967000 |
| C | -0.435903000 | 2.216309000  | 0.190788000  |
| H | -0.169360000 | 3.825624000  | 2.140917000  |
| H | 0.002188000  | 4.994660000  | 0.817182000  |
| N | 0.660883000  | 3.018689000  | 0.411980000  |
| H | 2.286238000  | 2.136379000  | -0.619894000 |
| O | -1.475910000 | 2.371124000  | 0.807341000  |
| C | 0.473554000  | 4.143538000  | 1.322125000  |
| H | 1.444599000  | 4.449527000  | 1.717813000  |
| C | 1.747837000  | 3.100075000  | -0.543497000 |
| H | 2.489590000  | 3.817851000  | -0.158926000 |
| H | -3.110697000 | 1.088321000  | -0.499511000 |
| H | -5.317848000 | -2.530338000 | 0.317326000  |
| O | 1.407810000  | 3.449562000  | -1.812232000 |

#### MXI TS(OH) HO'

E = -1126.64453183 Ha

|   |              |              |              |
|---|--------------|--------------|--------------|
| C | 4.638074000  | -0.277809000 | 0.127747000  |
| N | 1.167610000  | -2.428590000 | -0.339840000 |
| C | 0.290291000  | -1.444793000 | 0.009306000  |
| C | 0.950614000  | -0.276708000 | 0.366860000  |
| C | 4.757368000  | -1.646120000 | -0.276456000 |
| C | 3.655851000  | -2.428945000 | -0.461574000 |
| C | 2.367744000  | -1.884237000 | -0.229608000 |
| N | 2.286417000  | -0.557490000 | 0.189108000  |
| C | 3.396178000  | 0.237759000  | 0.341319000  |
| H | -1.699152000 | 0.363228000  | -0.388772000 |
| H | 3.718484000  | -3.461946000 | -0.782564000 |
| C | 5.867269000  | 0.576005000  | 0.282644000  |
| H | 6.427605000  | 0.628935000  | -0.656428000 |
| H | 5.608043000  | 1.595709000  | 0.577785000  |
| H | 6.538733000  | 0.162654000  | 1.042559000  |
| C | -1.160182000 | -1.682125000 | -0.016354000 |
| C | -1.658812000 | -2.980193000 | 0.149158000  |
| C | -3.025632000 | -3.215716000 | 0.133952000  |
| C | -3.942061000 | -2.171904000 | -0.041349000 |
| C | -3.441722000 | -0.882962000 | -0.220092000 |
| C | -2.070460000 | -0.643619000 | -0.222465000 |
| H | -0.952610000 | -3.792916000 | 0.285406000  |
| H | -3.396346000 | -4.229728000 | 0.265646000  |
| H | -5.752424000 | -2.813728000 | 0.942509000  |
| H | -4.134043000 | -0.056218000 | -0.366591000 |
| C | -5.424423000 | -2.444581000 | -0.035095000 |
| H | -5.995323000 | -1.540224000 | -0.260564000 |
| H | -5.689198000 | -3.206050000 | -0.775791000 |
| C | 0.468876000  | 1.010078000  | 0.949149000  |
| H | -0.515673000 | 0.847267000  | 1.392552000  |
| H | 1.142697000  | 1.326861000  | 1.759761000  |
| C | 0.454223000  | 2.130119000  | -0.094965000 |
| H | -0.143016000 | 3.698521000  | -1.966589000 |
| H | -0.120109000 | 4.980026000  | -0.743100000 |
| N | -0.586568000 | 3.027773000  | -0.050848000 |
| O | 1.328419000  | 2.199497000  | -0.940383000 |
| C | -0.637274000 | 4.071041000  | -1.070485000 |
| H | -1.682610000 | 4.296939000  | -1.289227000 |
| C | -1.479886000 | 3.149976000  | 1.080815000  |
| H | -1.915681000 | 4.153672000  | 1.044698000  |
| H | 5.749884000  | -2.051465000 | -0.451977000 |
| H | 3.209278000  | 1.276883000  | 0.583095000  |
| O | -3.522556000 | 2.527389000  | -0.792722000 |
| H | -3.032605000 | 1.824530000  | -1.264399000 |
| O | -2.468482000 | 2.166400000  | 1.159332000  |
| H | -3.244244000 | 2.338385000  | 0.392805000  |
| H | -0.929167000 | 3.048931000  | 2.025388000  |

#### MXI TS(OH) HOO'

E = -1201.76242210 Ha

|   |              |              |              |
|---|--------------|--------------|--------------|
| C | 4.874919000  | -0.067933000 | 0.286482000  |
| N | 1.521612000  | -2.334571000 | -0.454936000 |
| C | 0.597103000  | -1.374046000 | -0.179707000 |
| C | 1.185898000  | -0.189690000 | 0.230641000  |
| C | 5.069117000  | -1.431603000 | -0.105269000 |
| C | 4.012623000  | -2.250492000 | -0.377718000 |
| C | 2.692946000  | -1.749545000 | -0.249309000 |
| N | 2.538333000  | -0.425050000 | 0.161098000  |
| C | 3.604467000  | 0.408309000  | 0.400397000  |
| H | -1.218157000 | 0.305709000  | -1.280864000 |
| H | 4.135578000  | -3.279965000 | -0.692553000 |
| C | 6.060507000  | 0.824816000  | 0.534205000  |
| H | 5.746515000  | 1.832156000  | 0.817933000  |
| H | 6.690039000  | 0.426101000  | 1.336544000  |
| H | 6.683448000  | 0.905158000  | -0.362509000 |
| C | -0.851374000 | -1.591691000 | -0.314856000 |
| C | -1.449065000 | -2.767410000 | 0.146852000  |
| C | -2.830964000 | -2.930759000 | 0.071264000  |
| C | -3.649702000 | -1.942307000 | -0.484742000 |
| C | -3.041092000 | -0.785574000 | -0.983405000 |
| C | -1.665637000 | -0.605672000 | -0.892275000 |
| H | -0.820859000 | -3.539888000 | 0.579607000  |
| H | -3.285032000 | -3.838564000 | 0.460208000  |
| H | -5.464285000 | -3.082265000 | -0.194365000 |
| H | -3.653306000 | -0.001185000 | -1.420819000 |
| C | -5.148126000 | -2.088808000 | -0.522658000 |
| H | -5.616961000 | -1.344789000 | 0.129649000  |
| H | -5.531194000 | -1.927623000 | -1.535084000 |
| C | 0.565695000  | 1.028388000  | 0.829303000  |
| H | -0.403378000 | 0.725593000  | 1.225223000  |
| C | 0.479404000  | 2.171180000  | -0.178794000 |
| H | -0.720826000 | 4.818594000  | -0.978587000 |
| H | -1.837720000 | 3.739359000  | -1.857554000 |
| N | -0.730814000 | 2.792533000  | -0.367027000 |
| O | 1.474447000  | 2.471699000  | -0.817350000 |
| C | -0.847904000 | 3.813372000  | -1.401248000 |
| H | -0.071211000 | 3.638502000  | -2.141871000 |
| C | -1.868959000 | 2.745659000  | 0.522252000  |
| H | -2.046902000 | 3.764817000  | 0.912936000  |
| H | 6.085059000  | -1.804190000 | -0.201148000 |
| H | 3.357853000  | 1.440488000  | 0.619329000  |
| O | -3.902111000 | 0.702886000  | 1.445336000  |
| O | -3.017748000 | 2.303059000  | -0.087411000 |
| H | -3.608755000 | 1.440295000  | 0.718117000  |
| H | -1.672258000 | 2.105869000  | 1.399473000  |
| O | -2.726492000 | 0.194765000  | 1.960105000  |
| H | -2.585290000 | -0.613392000 | 1.422807000  |
| H | 1.169826000  | 1.382390000  | 1.675660000  |

#### MXI TS(OH) CH<sub>3</sub>O'

E = -1165.93318516 Ha

|   |              |              |              |
|---|--------------|--------------|--------------|
| C | 4.744205000  | -0.289859000 | 0.358683000  |
| N | 1.337379000  | -2.504264000 | -0.277395000 |
| C | 0.435944000  | -1.490540000 | -0.149955000 |
| C | 1.057022000  | -0.284127000 | 0.138187000  |
| C | 4.901053000  | -1.692422000 | 0.118296000  |
| C | 3.824220000  | -2.497962000 | -0.111382000 |
| C | 2.521266000  | -1.940483000 | -0.093651000 |
| N | 2.401569000  | -0.574220000 | 0.158445000  |
| C | 3.489372000  | 0.238860000  | 0.363552000  |
| H | -1.395321000 | 0.148094000  | -1.312644000 |
| H | 3.918305000  | -3.559304000 | -0.308279000 |
| C | 5.951798000  | 0.581520000  | 0.574106000  |
| H | 6.623120000  | 0.539756000  | -0.289736000 |
| H | 5.666239000  | 1.624955000  | 0.728219000  |
| H | 6.522194000  | 0.252421000  | 1.449048000  |
| C | -1.011656000 | -1.711901000 | -0.291650000 |
| C | -1.596193000 | -2.889710000 | 0.187063000  |
| C | -2.966867000 | -3.087370000 | 0.081949000  |
| C | -3.795423000 | -2.126361000 | -0.509249000 |
| C | -3.204814000 | -0.960696000 | -1.000668000 |
| C | -1.831157000 | -0.757967000 | -0.902329000 |
| H | -0.958468000 | -3.640060000 | 0.644267000  |
| H | -3.408082000 | -4.003857000 | 0.466704000  |
| H | -5.665542000 | -2.943941000 | 0.198351000  |
| H | -3.823650000 | -0.200060000 | -1.471316000 |

|   |              |              |              |   |              |              |              |
|---|--------------|--------------|--------------|---|--------------|--------------|--------------|
| C | -5.278505000 | -2.361691000 | -0.642748000 | C | -1.413495000 | 3.135987000  | 0.450807000  |
| H | -5.827739000 | -1.417254000 | -0.686904000 | H | -1.815296000 | 4.152844000  | 0.523881000  |
| H | -5.505100000 | -2.918679000 | -1.558863000 | H | 5.904575000  | -2.108436000 | 0.107278000  |
| C | 0.481164000  | 1.017986000  | 0.571879000  | H | 3.279250000  | 1.295730000  | 0.474633000  |
| H | -0.576681000 | 0.848640000  | 0.782333000  | O | -3.732466000 | 1.896985000  | 1.586138000  |
| H | 0.952843000  | 1.350383000  | 1.510586000  | O | -2.324088000 | 2.255710000  | -0.150977000 |
| C | 0.660370000  | 2.141746000  | -0.448846000 | H | -3.280841000 | 2.056285000  | 0.583391000  |
| H | -1.131080000 | 4.108113000  | -2.066032000 | H | -1.145504000 | 2.793463000  | 1.457539000  |
| H | 0.649563000  | 4.016484000  | -2.066322000 | C | -3.148390000 | 0.780573000  | 2.199213000  |
| N | -0.248273000 | 3.178178000  | -0.397427000 | H | -3.779318000 | 0.558509000  | 3.069338000  |
| O | 1.589517000  | 2.134083000  | -1.234887000 | H | -3.116182000 | -0.096438000 | 1.544144000  |
| C | -0.230574000 | 4.187374000  | -1.449573000 | H | -2.140502000 | 1.004841000  | 2.580276000  |
| H | -0.181268000 | 5.187679000  | -1.009541000 |   |              |              |              |
